# Supplementary material for: Cacolides: Sesterterpene Butenolides from a Southern Australian Marine Sponge, Cacospongia sp
Source: MDPI journal article supplement (doi:10.3390/md16110456), 2018-11-20
Supplement: s1 [file s1]

## SUPPORTING INFORMATION

# Cacolides: Sesterterpene butenolides from a southern Australian marine sponge, *Cacospongia* sp.

Shamsunnahar Khushi, Laizuman Nahar, Angela Salim, and Robert J. Capon\*

Institute for Molecular Bioscience, The University of Queensland, St Lucia, QLD 4072, Australia

## List of tables

|                                                                                                |    |
|------------------------------------------------------------------------------------------------|----|
| <b>Table S1.</b> NMR (600 MHz, CDCl <sub>3</sub> ) data for cacolide A ( <b>1</b> ).....       | 9  |
| <b>Table S2.</b> NMR (600 MHz,CDCl <sub>3</sub> ) data for cacolide B ( <b>2</b> ).....        | 10 |
| <b>Table S3.</b> NMR (600 MHz,CDCl <sub>3</sub> ) data for cacolide C ( <b>3</b> ).....        | 11 |
| <b>Table S4.</b> NMR (600 MHz,CDCl <sub>3</sub> ) data for cacolide D ( <b>4</b> ).....        | 12 |
| <b>Table S5.</b> NMR (600 MHz,CDCl <sub>3</sub> ) data for cacolide E ( <b>5</b> ).....        | 13 |
| <b>Table S6.</b> NMR (600 MHz,CDCl <sub>3</sub> ) data for cacolide F ( <b>6</b> ).....        | 14 |
| <b>Table S7.</b> NMR (600 MHz,CDCl <sub>3</sub> ) data for cacolide G ( <b>7</b> ).....        | 15 |
| <b>Table S8.</b> NMR (600 MHz,CDCl <sub>3</sub> ) data for cacolide H ( <b>8</b> ).....        | 16 |
| <b>Table S9.</b> NMR (600 MHz,CDCl <sub>3</sub> ) data for cacolide I ( <b>9</b> ).....        | 17 |
| <b>Table S10.</b> NMR (600 MHz,CDCl <sub>3</sub> ) data for cacolide J ( <b>10</b> ).....      | 18 |
| <b>Table S11.</b> NMR (600 MHz,CDCl <sub>3</sub> ) data for cacolide K ( <b>11</b> ).....      | 19 |
| <b>Table S12.</b> NMR (600 MHz,CDCl <sub>3</sub> ) data for cacolide L ( <b>12</b> ).....      | 20 |
| <b>Table S13.</b> NMR (600 MHz,CDCl <sub>3</sub> ) data for cacolic acid A ( <b>13</b> ) ..... | 21 |
| <b>Table S14.</b> NMR (600 MHz,CDCl <sub>3</sub> ) data for cacolic acid B ( <b>14</b> ).....  | 22 |
| <b>Table S15.</b> NMR (600 MHz,CDCl <sub>3</sub> ) data for cacolic acid C ( <b>15</b> ).....  | 23 |

## List of figures

|                                                                                                                                                                                                                                                                                |    |
|--------------------------------------------------------------------------------------------------------------------------------------------------------------------------------------------------------------------------------------------------------------------------------|----|
| <b>Figure S1.</b> Fractionation scheme of CMB-03404.....                                                                                                                                                                                                                       | 4  |
| <b>Figure S2.</b> HPLC-DAD (210 nm) chromatogram (C8 column) of DCM partition of the crude extract<br>CMB-03404 {inset: UV spectra for compounds <b>1-15</b> }.....                                                                                                            | 4  |
| <b>Figure S3.</b> Molecular networking for five <i>Ircinia</i> sp. (CMB-01064, CMB-03363, CMB-01058, CMB-01693, CMB-02014) and two authentic standards (7 <i>E</i> ,12 <i>E</i> ,20 <i>Z</i> ,18 <i>S</i> )-variabilin ( <b>16</b> ), ircinialactam A ( <b>20</b> ).....       | 5  |
| <b>Figure S4.</b> Molecular networking for five <i>Psammocinia</i> sp. (CMB-03231, CMB-01018, CMB-03344, CMB-01757, CMB-02026) and two authentic standards (7 <i>E</i> ,12 <i>E</i> ,20 <i>Z</i> ,18 <i>S</i> )-variabilin ( <b>16</b> ), ircinialactam A ( <b>20</b> ).....   | 6  |
| <b>Figure S5.</b> Molecular networking for five <i>Sarcotragus</i> sp. (CMB-01788, CMB-01848, CMB-02707, CMB-002717, CMB-03390) and two authentic standards (7 <i>E</i> ,12 <i>E</i> ,20 <i>Z</i> ,18 <i>S</i> )-variabilin ( <b>16</b> ), ircinialactam A ( <b>20</b> ) ..... | 7  |
| <b>Figure S6.</b> Molecular networking for two <i>Ircinia</i> sp. (CMB-01064, CMB-03363), <i>Cacospongia</i> sp. (CMB-03404) and two authentic standards (7 <i>E</i> ,12 <i>E</i> ,20 <i>Z</i> ,18 <i>S</i> )-variabilin ( <b>16</b> ), ircinialactam A ( <b>20</b> ) .....    | 8  |
| <b>Figure S7.</b> <sup>1</sup> H NMR (600 MHz, CDCl <sub>3</sub> ) spectrum of cacolide A ( <b>1</b> ).....                                                                                                                                                                    | 24 |
| <b>Figure S8.</b> <sup>13</sup> C NMR (150 MHz, CDCl <sub>3</sub> ) spectrum of cacolide A ( <b>1</b> ).....                                                                                                                                                                   | 24 |
| <b>Figure S9.</b> <sup>1</sup> H NMR (600 MHz, CDCl <sub>3</sub> ) spectrum of cacolide B ( <b>2</b> ).....                                                                                                                                                                    | 25 |
| <b>Figure S10.</b> <sup>13</sup> C NMR (150 MHz, CDCl <sub>3</sub> ) spectrum of cacolide B ( <b>2</b> ).....                                                                                                                                                                  | 25 |
| <b>Figure S11.</b> <sup>1</sup> H NMR (600 MHz, CDCl <sub>3</sub> ) spectrum of cacolide C ( <b>3</b> ).....                                                                                                                                                                   | 26 |
| <b>Figure S12.</b> <sup>13</sup> C NMR (150 MHz, CDCl <sub>3</sub> ) spectrum of cacolide C ( <b>3</b> ).....                                                                                                                                                                  | 26 |
| <b>Figure S13.</b> HSQC NMR (CDCl <sub>3</sub> ) spectrum of cacolide C ( <b>3</b> ) .....                                                                                                                                                                                     | 27 |
| <b>Figure S14.</b> <sup>1</sup> H NMR (600 MHz, CDCl <sub>3</sub> ) spectrum of cacolide D ( <b>4</b> ).....                                                                                                                                                                   | 28 |
| <b>Figure S15.</b> <sup>13</sup> C NMR (150 MHz, CDCl <sub>3</sub> ) spectrum of cacolide D ( <b>4</b> ).....                                                                                                                                                                  | 28 |
| <b>Figure S16.</b> <sup>1</sup> H NMR (600 MHz, CDCl <sub>3</sub> ) spectrum of cacolide E ( <b>5</b> ) .....                                                                                                                                                                  | 29 |
| <b>Figure S17.</b> <sup>13</sup> C NMR (150 MHz, CDCl <sub>3</sub> ) spectrum of cacolide E ( <b>5</b> ) .....                                                                                                                                                                 | 29 |
| <b>Figure S18.</b> <sup>1</sup> H NMR (600 MHz, CDCl <sub>3</sub> ) spectrum of cacolide F ( <b>6</b> ).....                                                                                                                                                                   | 30 |
| <b>Figure S19.</b> <sup>1</sup> H NMR (600 MHz, CDCl <sub>3</sub> ) spectrum of cacolide G ( <b>7</b> ).....                                                                                                                                                                   | 31 |

|                                                                                                                  |    |
|------------------------------------------------------------------------------------------------------------------|----|
| <b>Figure S20.</b> $^{13}\text{C}$ NMR (150 MHz, $\text{CDCl}_3$ ) spectrum of cacolide G (7).....               | 31 |
| <b>Figure S21.</b> $^1\text{H}$ NMR (600 MHz, $\text{CDCl}_3$ ) spectrum of cacolide H (8).....                  | 32 |
| <b>Figure S22.</b> $^{13}\text{C}$ NMR (150 MHz, $\text{CDCl}_3$ ) spectrum of cacolide H (8).....               | 32 |
| <b>Figure S23.</b> $^1\text{H}$ NMR (600 MHz, $\text{CDCl}_3$ ) spectrum of cacolide I (9) .....                 | 33 |
| <b>Figure S24.</b> $^{13}\text{C}$ NMR (150 MHz, $\text{CDCl}_3$ ) spectrum of cacolide I (9) .....              | 33 |
| <b>Figure S25.</b> $^1\text{H}$ NMR (600 MHz, $\text{CDCl}_3$ ) spectrum of cacolide J (10) .....                | 31 |
| <b>Figure S26.</b> $^{13}\text{C}$ NMR (150 MHz, $\text{CDCl}_3$ ) spectrum of cacolide J (10) .....             | 31 |
| <b>Figure S27.</b> $^1\text{H}$ NMR (600 MHz, $\text{CDCl}_3$ ) spectrum of cacolide K (11) .....                | 35 |
| <b>Figure S28.</b> $^1\text{H}$ NMR (600 MHz, $\text{CDCl}_3$ ) spectrum of cacolide L (12).....                 | 36 |
| <b>Figure S29.</b> $^{13}\text{C}$ NMR (150 MHz, $\text{CDCl}_3$ ) spectrum of cacolide L (12) .....             | 36 |
| <b>Figure S30.</b> $^1\text{H}$ NMR (600 MHz, $\text{CDCl}_3$ ) spectrum of cacolic acid A (13).....             | 37 |
| <b>Figure S31.</b> $^{13}\text{C}$ NMR (150 MHz, $\text{CDCl}_3$ ) spectrum of cacolic acid A (13).....          | 37 |
| <b>Figure S32.</b> HSQC NMR (600 MHz, $\text{CDCl}_3$ ) spectrum of cacolic acid A (13).....                     | 38 |
| <b>Figure S33.</b> $^1\text{H}$ NMR (600 MHz, $\text{CDCl}_3$ ) spectrum of cacolic acid B (14).....             | 39 |
| <b>Figure S34.</b> $^{13}\text{C}$ NMR (150 MHz, $\text{CDCl}_3$ ) spectrum of cacolic acid B (14).....          | 39 |
| <b>Figure S35.</b> $^1\text{H}$ NMR (600 MHz, $\text{CDCl}_3$ ) spectrum of cacolic acid C (15).....             | 40 |
| <b>Figure S36.</b> $^{13}\text{C}$ NMR (150 MHz, $\text{CDCl}_3$ ) spectrum of cacolic acid C (15).....          | 40 |
| <b>Figure S37.</b> Antimicrobial activity of cacolides A-I (1-9), K-L (11-12) and cacolic acids A-C (13-15)..... | 41 |
| <b>Figure S38.</b> Cytotoxic activity of cacolides A-I (1-9), K-L (11-12) and cacolic acids A-C (13-15).....     | 42 |
| <b>Figure S39.</b> HR-ESIMS data for cacolide A (1).....                                                         | 43 |
| <b>Figure S40.</b> HR-ESIMS data for cacolide B (2).....                                                         | 43 |
| <b>Figure S41.</b> HR-ESIMS data for cacolide C (3).....                                                         | 44 |
| <b>Figure S42.</b> HR-ESIMS data for cacolide D (4).....                                                         | 44 |
| <b>Figure S43.</b> HR-ESIMS data for cacolide E (5).....                                                         | 45 |
| <b>Figure S44.</b> HR-ESIMS data for cacolide F (6).....                                                         | 45 |
| <b>Figure S45.</b> HR-ESIMS data for cacolide G (7).....                                                         | 46 |
| <b>Figure S46.</b> HR-ESIMS data for cacolide H (8).....                                                         | 46 |
| <b>Figure S47.</b> HR-ESIMS data for cacolide I (9).....                                                         | 47 |
| <b>Figure S48.</b> HR-ESIMS data for cacolide J (10).....                                                        | 48 |
| <b>Figure S49.</b> HR-ESIMS data for cacolide K (11).....                                                        | 49 |
| <b>Figure S50.</b> HR-ESIMS data for cacolide L (12).....                                                        | 49 |
| <b>Figure S51.</b> HR-ESIMS data for cacolic acid A (13).....                                                    | 50 |
| <b>Figure S52.</b> HR-ESIMS data for cacolic acid B (14).....                                                    | 50 |
| <b>Figure S53.</b> HR-ESIMS data for cacolic acid C (15).....                                                    | 51 |

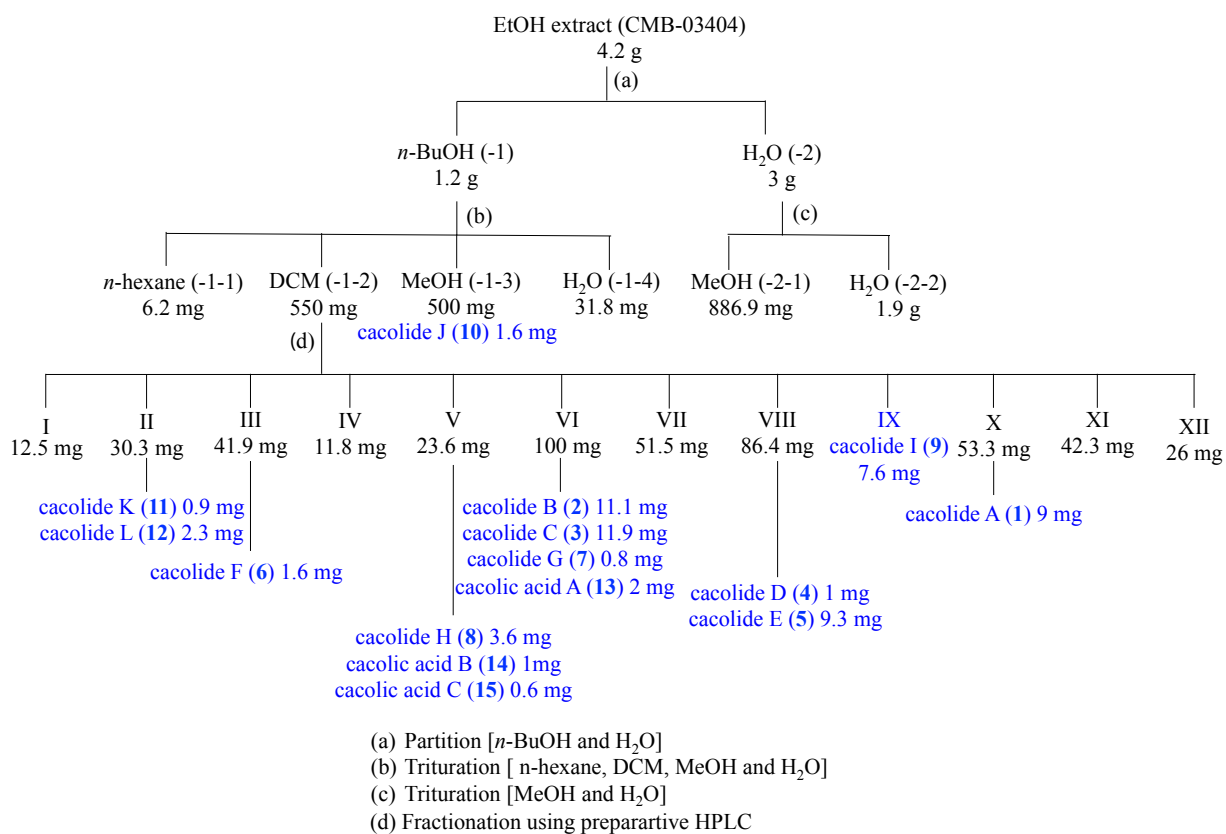

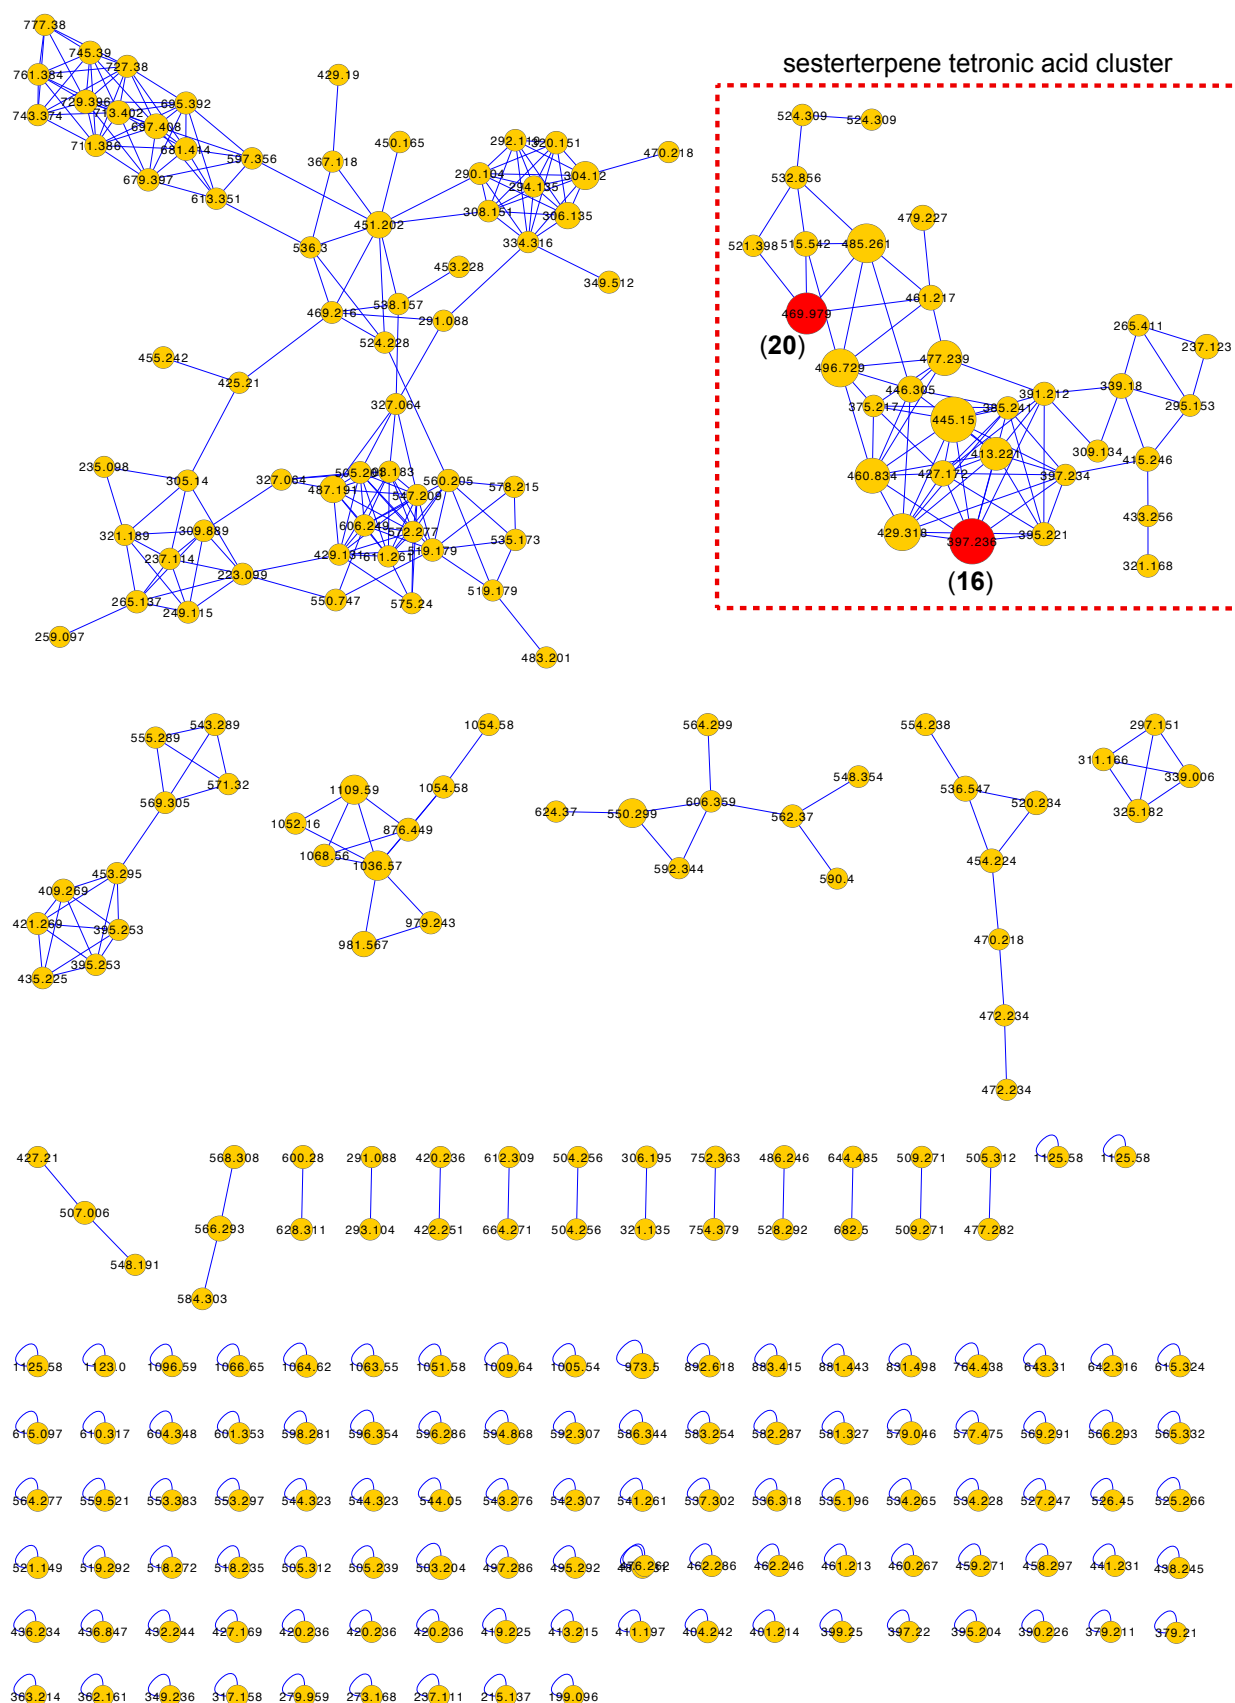

**Figure S3.** Molecular networking for five *Ircinia* sp. (CMB-01064, CMB-03363, CMB-01058, CMB-01693, CMB-02014) and two authentic standards (7*E*,12*E*,20*Z*,18*S*)-variabilin (**16**), ircinialactam A (**20**) (yellow- nodes from all five *Ircinia* sp. and red- authentic standards)

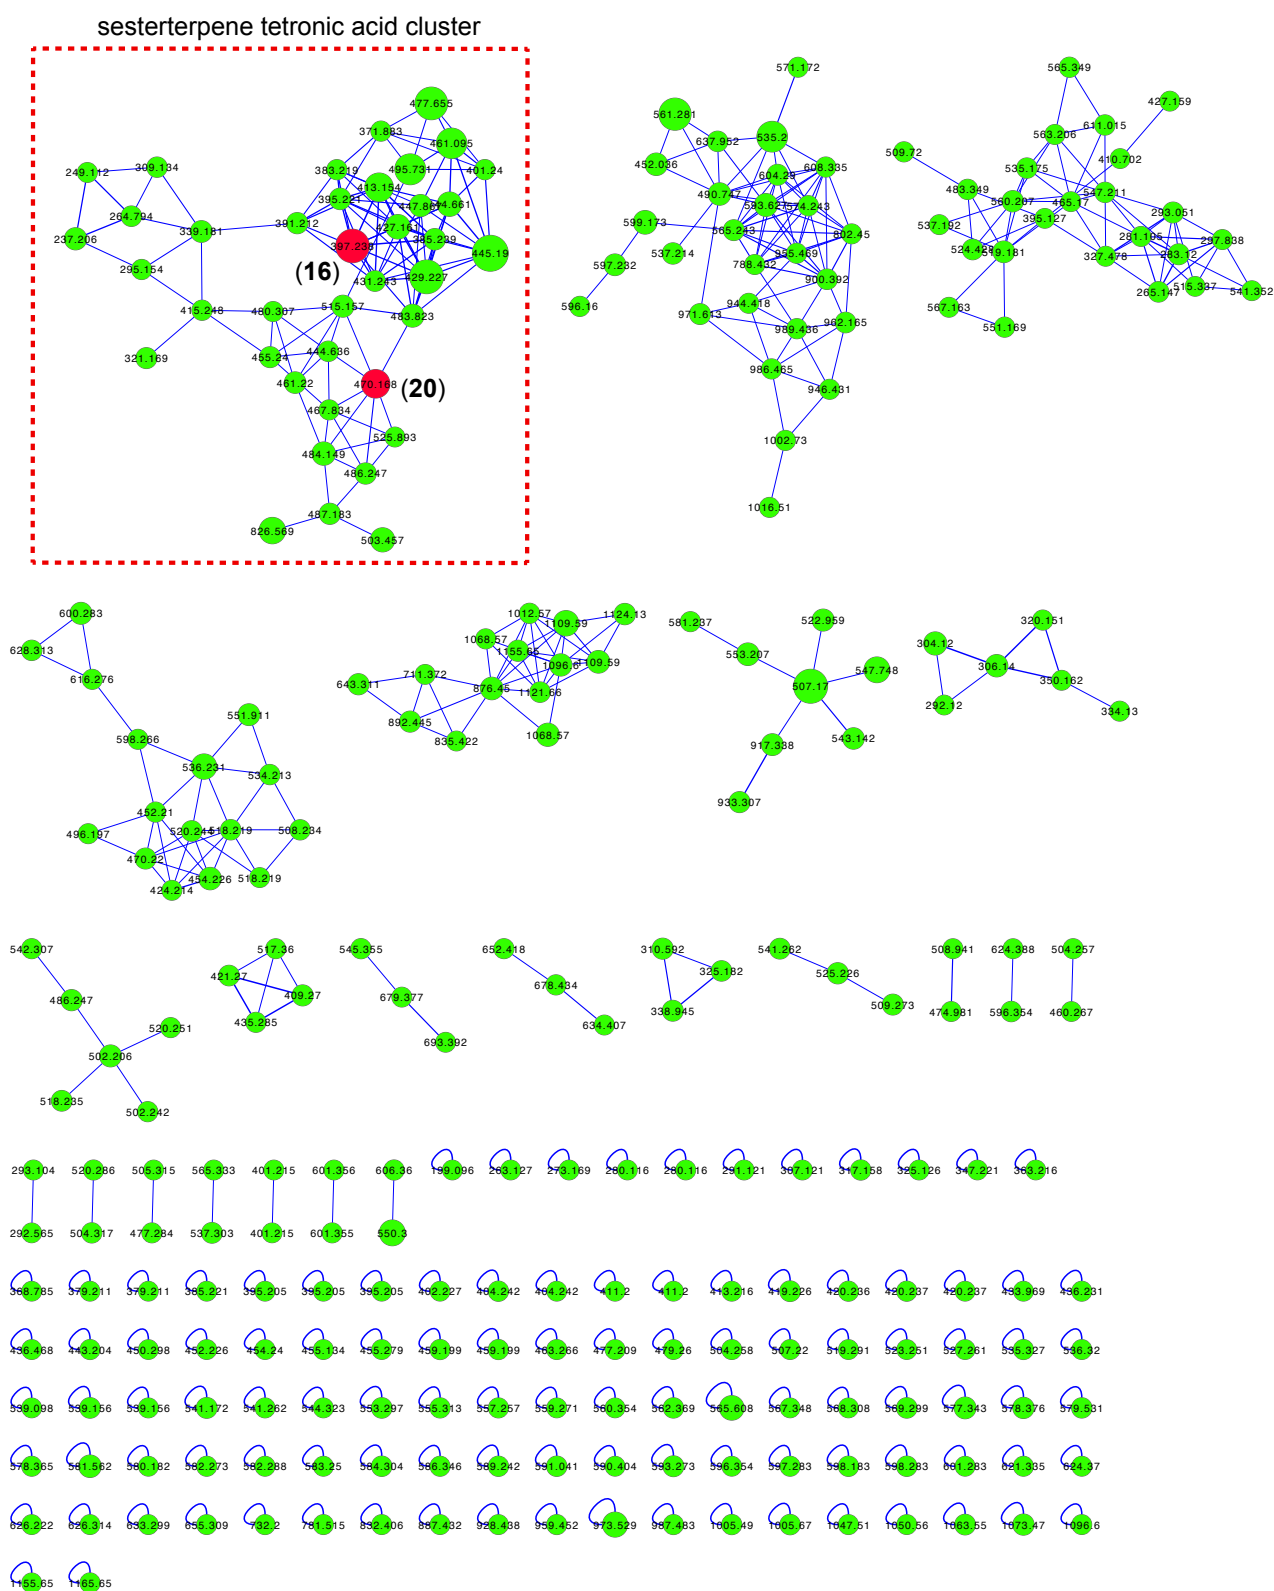

**Figure S4.** Molecular networking for five *Psammocinia* sp. (CMB-03231, CMB-01018, CMB-03344, CMB-01757, CMB-02026) and two authentic standards (7E,12E,20Z,18S)-variabilin (16), ircinialactam A (20) (green- nodes from all five *Psammocinia* sp. and red- authentic standards)

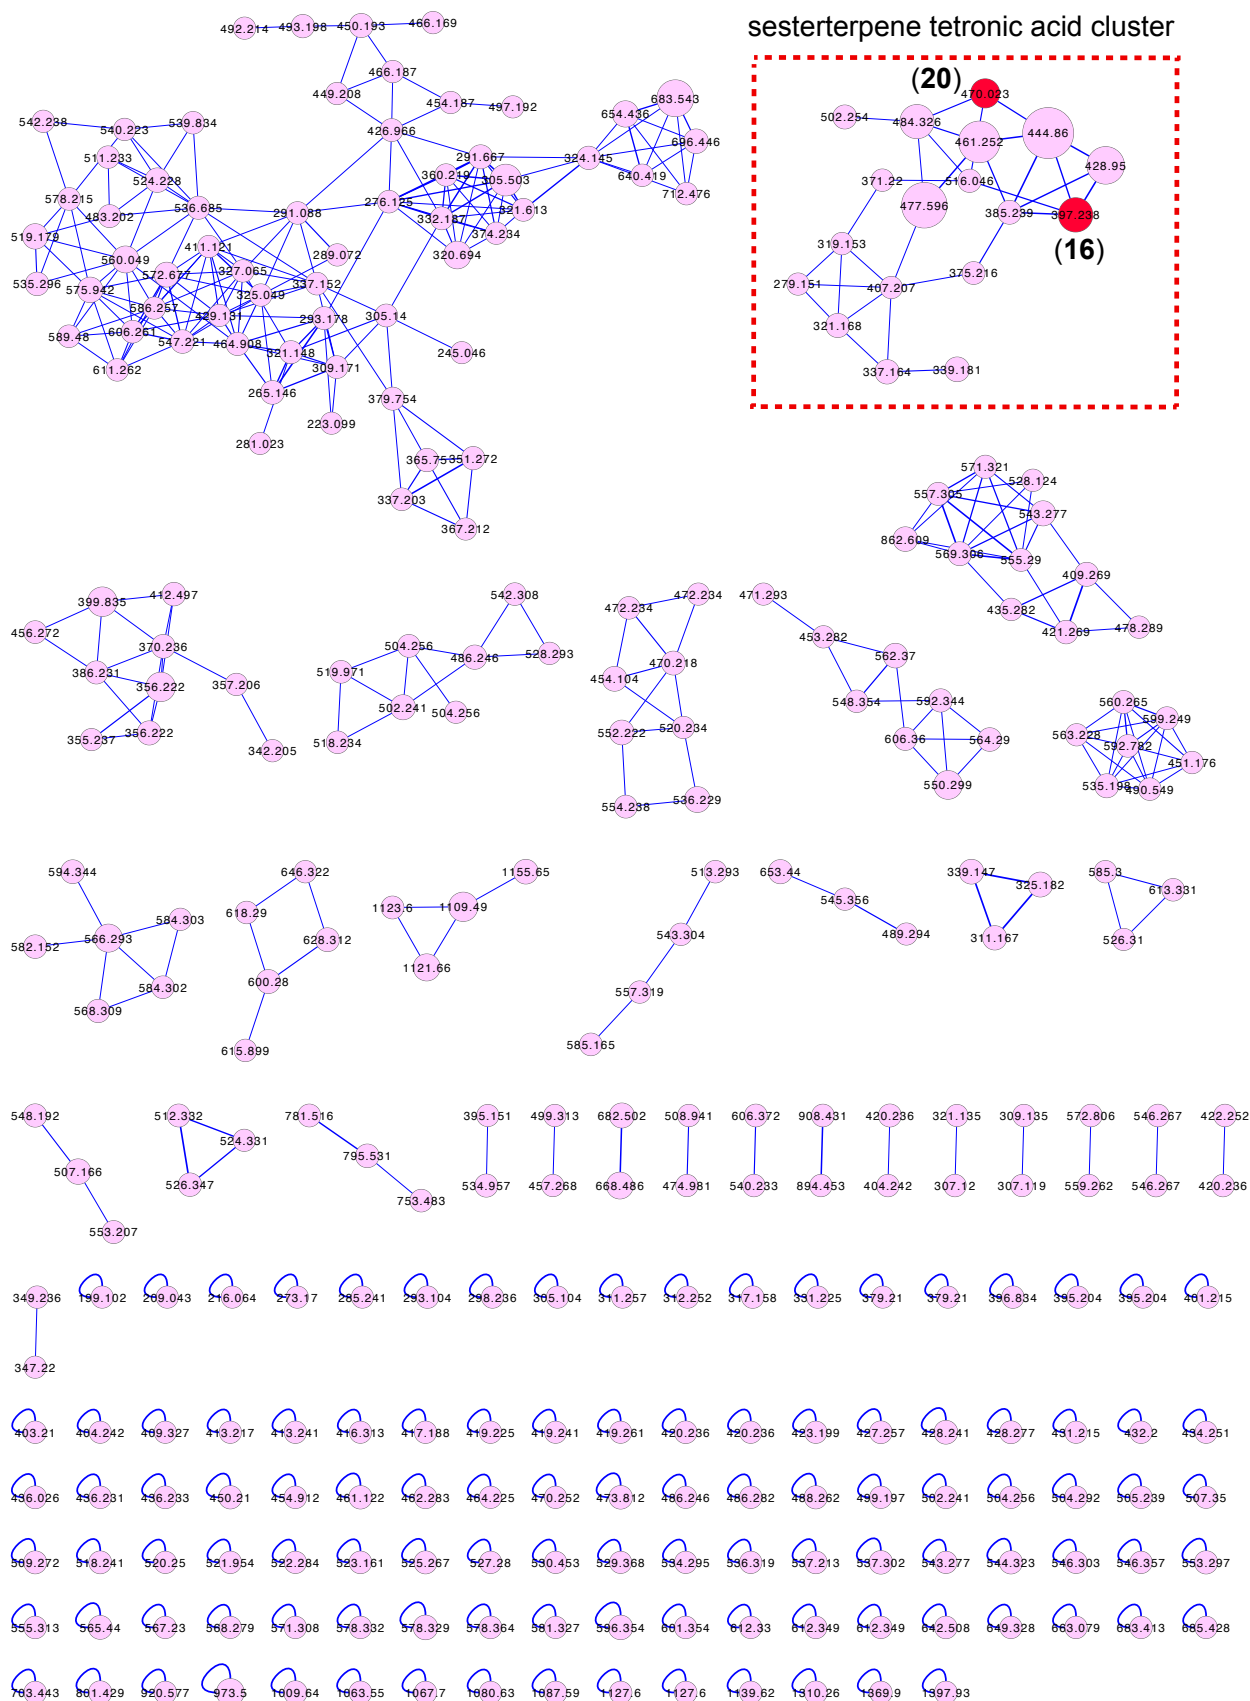

**Figure S5.** Molecular networking for five *Sarcotragus* sp. (CMB-01788, CMB-01848, CMB-02707, CMB-002717, CMB-03390) and two authentic standards (7*E*,12*E*,20*Z*,18*S*)-variabilin **(16)**, ircinialactam A **(20)** (pink- nodes from all five *Sarcotragus* sp. and red- authentic standards)

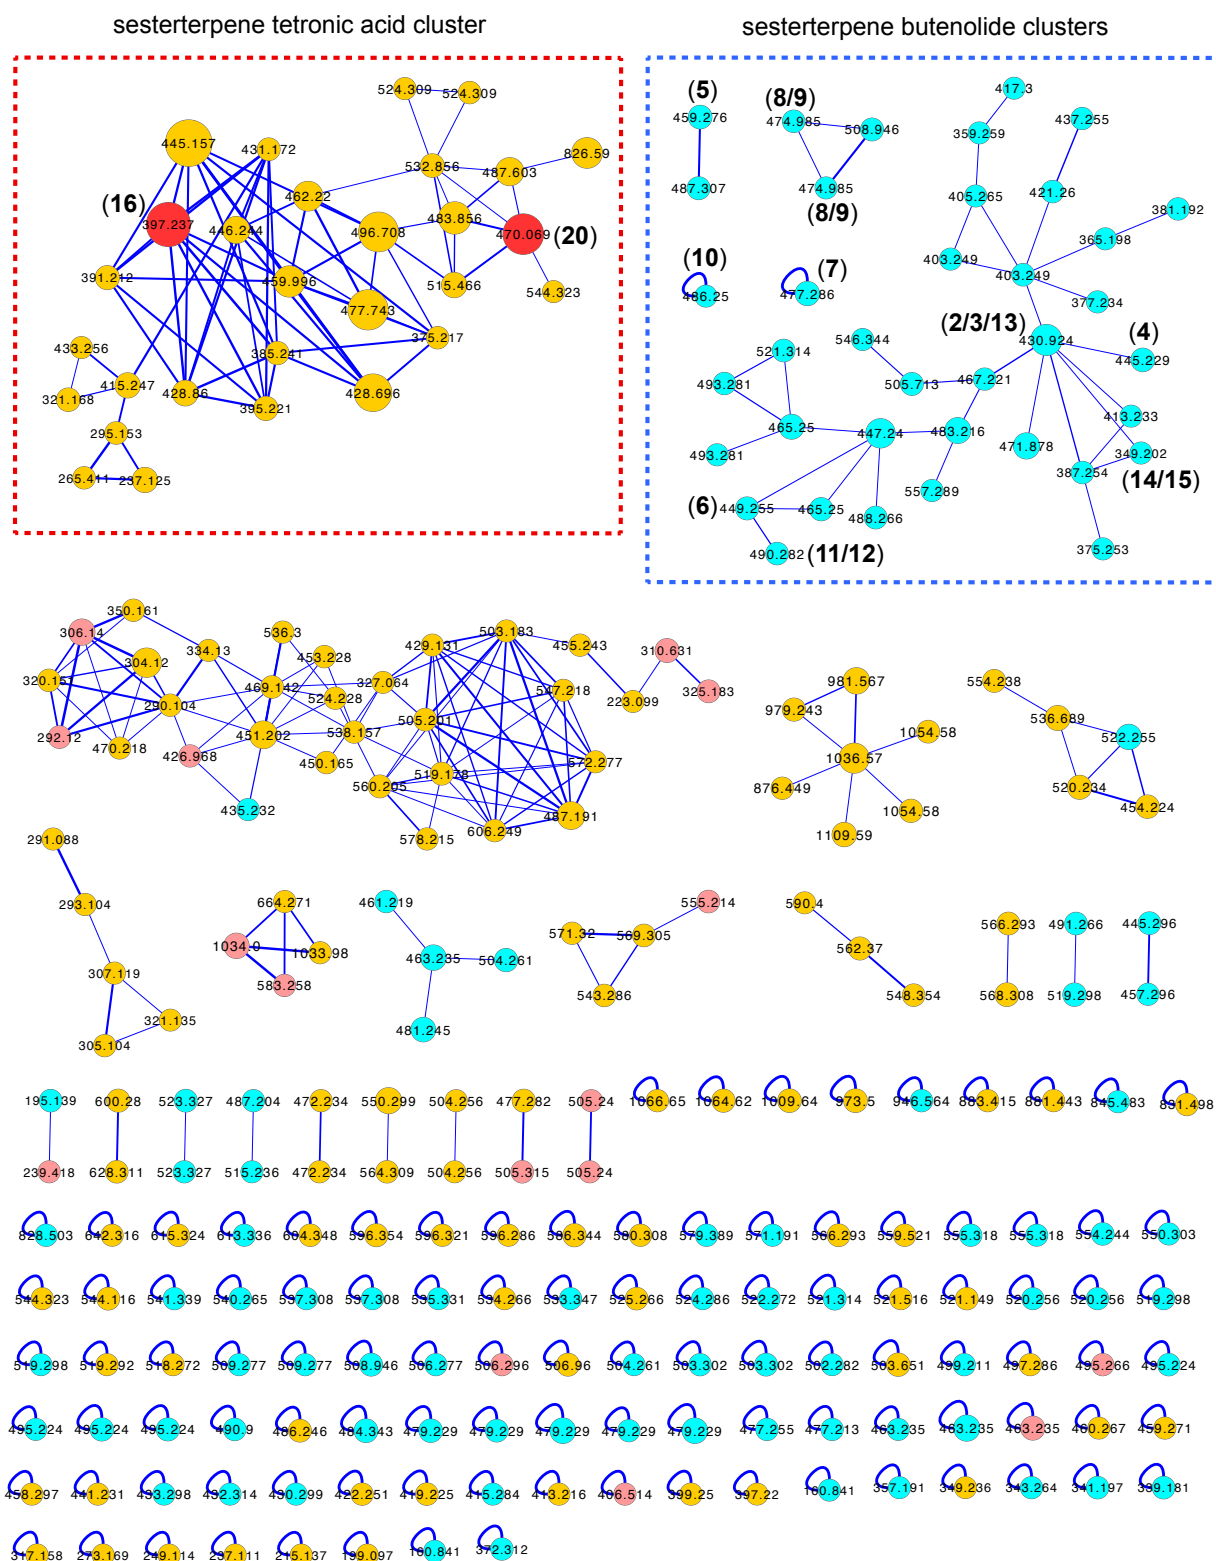

**Figure S6.** Molecular networking for two *Ircinia* sp. (CMB-01064, CMB-03363), *Cacospongia* sp. (CMB-03404) and two authentic standards (7*E*,12*E*,20*Z*,18*S*)-variabilin (16), ircinialactam A (20) (yellow- nodes from *Ircinia* sp., red- authentic standards and pink- commonly present)



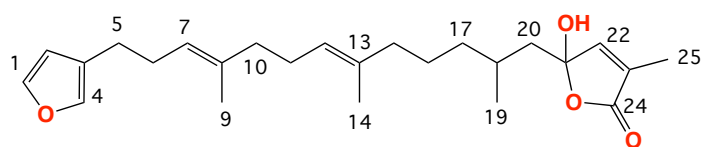

**Table S1.** NMR (600 MHz, CDCl<sub>3</sub>) data for cacolide A (1)

| no. | $\delta_C$ | $\delta_H$ , mult. ( <i>J</i> in Hz) | COSY                   | HMBC               | ROESY  |
|-----|------------|--------------------------------------|------------------------|--------------------|--------|
| 1   | 142.7      | 7.33, br s                           | 2, 4                   | 2, 3, 4            |        |
| 2   | 111.3      | 6.28, br s                           | 1, 4, 5                | 1, 3, 4, 5         | 5      |
| 3   | 125.2      |                                      |                        |                    |        |
| 4   | 139.0      | 7.21, br s                           | 2, 5                   | 1, 2, 3            |        |
| 5   | 25.2       | 2.45, t (7.7)                        | 2, 4, 6                | 2, 4, 6, 7         | 7      |
| 6   | 28.6       | 2.24, dt 7.3, 7.7)                   | 5, 7                   | 5, 7, 8            |        |
| 7   | 123.9      | 5.16 (br t, 7.3)                     | 6, 9, 10               | 5, 6, 9, 10        | 5, 10  |
| 8   | 135.9      |                                      |                        |                    |        |
| 9   | 16.2       | 1.59, s                              | 7, 10                  | 7, 8, 10, 11       |        |
| 10  | 39.9       | 2.01, t (7.4)                        | 7, 9, 11               | 7, 8, 9, 11        | 7, 12  |
| 11  | 26.7       | 2.07, dt (7.4, 7.4)                  | 10, 12, 14             | 10, 12, 13         |        |
| 12  | 124.4      | 5.04, br t (7.4)                     | 11, 14, 15             | 11, 14, 15         | 10, 15 |
| 13  | 135.1      |                                      |                        |                    |        |
| 14  | 16.0       | 1.57, s                              | 11, 12, 15             | 12, 13, 15         |        |
| 15  | 39.9       | 1.93 <sup>a</sup>                    | 12, 16                 | 12, 13, 14, 16, 17 | 12     |
| 16  | 25.2       | 1.36, m                              | 15, 17                 | 13, 15, 17, 18     |        |
| 17  | 37.6       | a 1.30, m<br>b 1.16, m               | 15, 16, 17b<br>17a, 18 | 15, 16, 18, 19, 20 |        |
| 18  | 28.7       | 1.64, m                              | 17b, 19, 20            |                    | 22     |
| 19  | 21.1       | 0.96, br d (6.7)                     | 18                     | 17, 18, 20         |        |
| 20  | 44.9       | a 1.94 <sup>a</sup><br>b 1.74, m     | 20b<br>20a             | 21                 |        |
| 21  | 106.2      |                                      |                        |                    |        |
| 22  | 147.6      | 6.82, br s                           | 25                     | 21, 23, 24         | 18     |
| 23  | 132.1      |                                      |                        |                    |        |
| 24  | 171.9      |                                      |                        |                    |        |
| 25  | 10.7       | 1.93 <sup>a</sup> , s                | 22                     | 22, 23, 24         |        |

<sup>a</sup> Overlapping signals

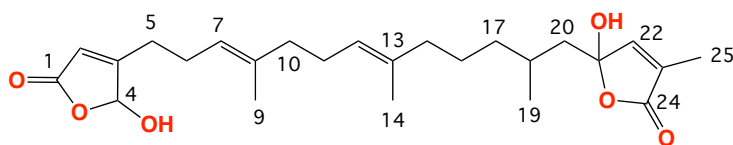

**Table S2.** Table 2. NMR (600 MHz, CDCl<sub>3</sub>) data for cacolide B (**2**)

| no. | $\delta_C$        | $\delta_H$ , mult. ( <i>J</i> in Hz) | COSY                       | HMBC               | ROESY  |
|-----|-------------------|--------------------------------------|----------------------------|--------------------|--------|
| 1   | 170.0             |                                      |                            |                    |        |
| 2   | 117.6             | 5.83, br s                           | 4, 5                       | 1, 3, 4, 5         | 5      |
| 3   | 171.1             |                                      |                            |                    |        |
| 4   | 99.5              | 6.01, br s                           | 2                          | 2, 3               |        |
| 5   | 28.0              | a. 2.52, m<br>b. 2.39, m             | 2, 4, 5b, 6<br>2, 4, 5a, 6 | 2, 4, 6, 7         | 2, 7   |
| 6   | 25.3              | 2.30, dt (7.2, 7.2)                  | 5, 7                       | 5, 7, 8            |        |
| 7   | 122.6             | 5.09, br t (7.2)                     | 6, 9, 10                   | 5, 6, 9, 10        | 5, 10  |
| 8   | 136.9             |                                      |                            |                    |        |
| 9   | 16.1 <sup>a</sup> | 1.61 (s)                             | 7, 10                      | 7, 8, 10, 11       |        |
| 10  | 39.5              | 2.02, t (7.0)                        | 7, 11                      | 7, 8, 9, 11        | 7, 12  |
| 11  | 25.9              | 2.09, dt (7.0, 7.0)                  | 10, 12, 14                 | 8, 10, 12, 13      |        |
| 12  | 123.9             | 5.02, br t (7.0)                     | 11, 14, 15                 | 14, 11, 15         | 10, 15 |
| 13  | 135.4             |                                      |                            |                    |        |
| 14  | 16.1 <sup>a</sup> | 1.56 (s)                             | 12, 15                     | 12, 13, 15         |        |
| 15  | 39.8              | 1.91, m                              | 12, 16                     | 12, 13, 14, 16, 17 | 12     |
| 16  | 25.1              | 1.34, m                              | 15, 17                     | 13, 15, 17, 18     |        |
| 17  | 37.5              | a 1.29, m<br>b 1.14, m               | 15, 16, 17b<br>17a, 18     | 15, 16, 18, 19, 20 |        |
| 18  | 28.6              | 1.64, m                              | 19, 20                     |                    |        |
| 19  | 21.1              | 0.94, br d (6.5)                     | 18                         | 17, 18, 20         |        |
| 20  | 44.7              | a 1.95, m<br>b 1.71, m               | 20b<br>20a                 | 21                 |        |
| 21  | 107.0             |                                      |                            |                    |        |
| 22  | 148.0             | 6.85 (br s)                          | 25                         | 21, 23, 24         |        |
| 23  | 131.9             |                                      |                            |                    |        |
| 24  | 172.6             |                                      |                            |                    |        |
| 25  | 10.6              | 1.90 (s)                             | 22                         | 22, 23, 24         |        |

<sup>a</sup>Signals are interchangeable

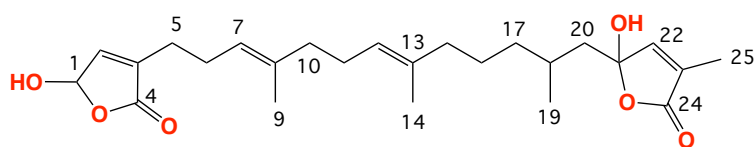

**Table S3.** NMR (600 MHz, CDCl<sub>3</sub>) data for cacolide C (**3**)

| no. | $\delta_C$        | $\delta_H$ , mult. ( <i>J</i> in Hz) | COSY                   | HMBC           | ROESY  |
|-----|-------------------|--------------------------------------|------------------------|----------------|--------|
| 1   | 97.2              | 6.09, br s                           | 2                      | 3, 4           |        |
| 2   | 144.1             | 6.84 <sup>b</sup> , br s             | 5, 1                   | 1, 3, 4, 5     | 5      |
| 3   | 137.8             |                                      |                        |                |        |
| 4   | 172.5             |                                      |                        |                |        |
| 5   | 25.4              | 2.32, t (7.3)                        | 2, 6                   | 2, 4, 6, 7     | 2, 7   |
| 6   | 25.6              | 2.26, dt (7.2, 7.3)                  | 5, 7                   | 5, 7, 8        |        |
| 7   | 122.9             | 5.09, br t, (7.2)                    | 6, 9, 10               | 5, 6, 9, 10    | 5, 10  |
| 8   | 136.8             |                                      |                        |                |        |
| 9   | 16.1 <sup>a</sup> | 1.59, s                              | 7, 10                  | 7, 8, 10, 11   |        |
| 10  | 39.5              | 2.01, t (7.0)                        | 7, 9, 11               | 7, 8, 9, 11    | 7, 12  |
| 11  | 26.1              | 2.08, dt (7.0, 7.3)                  | 10, 12, 14             | 8, 10, 12, 13  |        |
| 12  | 124.2             | 5.04, br t (7.3)                     | 11, 14, 15             | 11, 14, 15     | 10, 15 |
| 13  | 135.3             |                                      |                        |                |        |
| 14  | 16.1 <sup>a</sup> | 1.56, s                              | 12, 15                 | 12, 13, 15     |        |
| 15  | 39.8              | 1.92, m                              | 12, 16                 | 12, 13, 14, 17 | 12     |
| 16  | 25.1              | 1.35, m                              | 15, 17                 | 13, 15, 17, 18 |        |
| 17  | 37.5              | a 1.30, m<br>b 1.14, m               | 15, 16, 17b<br>17a, 18 | 15, 16, 18, 19 |        |
| 18  | 28.6              | 1.63, m                              | 19                     |                | 22     |
| 19  | 21.2              | 0.94, br d (6.3)                     | 18                     | 17, 18, 20     |        |
| 20  | 44.7              | a 1.93, m<br>b 1.71, m               | 20b<br>20a             | 21             |        |
| 21  | 107.0             |                                      |                        |                |        |
| 22  | 148.0             | 6.84 <sup>b</sup> , br s             | 25                     | 21, 23, 24     | 18     |
| 23  | 131.8             |                                      |                        |                |        |
| 24  | 172.6             |                                      |                        |                |        |
| 25  | 10.6              | 1.90, s                              | 22                     | 22, 23, 24     |        |

<sup>a</sup>Signals are interchangeable

<sup>b</sup>Overlapping signals

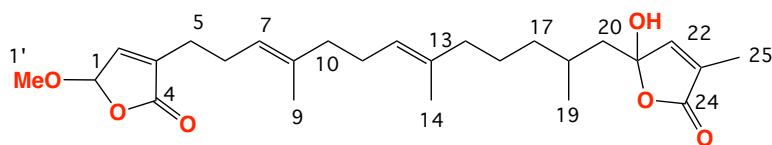

**Table S4.** NMR (600 MHz, CDCl<sub>3</sub>) data for cacolide D (**4**)

| no.   | $\delta_C$ | $\delta_H$ , mult. ( <i>J</i> in Hz) | COSY               | HMBC               | ROESY |
|-------|------------|--------------------------------------|--------------------|--------------------|-------|
| 1     | 102.6      | 5.74, br s                           | 2                  | OMe, 3, 4          | OMe   |
| 2     | 142.2      | 6.78, br s                           | 1, 5               | 1, 3, 4, 5         | 5     |
| 3     | 138.6      |                                      |                    |                    |       |
| 4     | 171.9      |                                      |                    |                    |       |
| 5     | 25.5       | 2.34, t (7.3)                        | 2, 6               | 2, 3, 4, 6, 7      | 2, 7  |
| 6     | 25.7       | 2.26, dt (7.3, 7.2)                  | 5, 7               | 5, 7, 8            |       |
| 7     | 122.6      | 5.10, br t (7.2)                     | 6, 9               | 5, 9, 10           | 5, 10 |
| 8     | 136.8      |                                      |                    |                    |       |
| 9     | 16.3       | 1.61, s                              | 7, 10              | 7, 8, 10           |       |
| 10    | 39.7       | 2.01, t (7.0)                        | 9, 11              | 7, 8, 9, 11, 12    | 7     |
| 11    | 26.5       | 2.08, dt (7.0, 7.3)                  | 10, 12             | 10, 12, 13         |       |
| 12    | 124.2      | 5.07, br t (7.3)                     | 11, 14             | 11, 14, 15         | 15    |
| 13    | 135.2      |                                      |                    |                    |       |
| 14    | 16.1       | 1.57, s                              | 12                 | 12, 13, 15         |       |
| 15    | 39.9       | 1.94 <sup>a</sup> , m                | 16                 | 12, 13, 14, 16, 17 | 12    |
| 16    | 25.2       | 1.35, m                              | 15, 17             | 13, 15, 17         |       |
| 17    | 37.5       | a 1.30, m<br>b 1.17, m               | 16, 17b<br>17a, 18 | 16                 |       |
| 18    | 29.0       | 1.65, m                              | 19                 |                    |       |
| 19    | 21.3       | 0.96, s                              | 18                 | 17, 18, 20         |       |
| 20    | 44.9       | a 1.94 <sup>a</sup> , m<br>b 1.73, m | 20b<br>20a         |                    |       |
| 21    | 105.8      |                                      |                    |                    |       |
| 22    | 147.6      | 6.84, br s                           | 25                 | 21, 24             |       |
| 23    | 135.2      |                                      |                    |                    |       |
| 24    | 171.2      |                                      |                    |                    |       |
| 25    | 10.8       | 1.94 <sup>a</sup> , s                | 22                 | 22, 23, 24         |       |
| 1-OMe | 57.3       | 3.56, s                              |                    | 1                  | 1     |

<sup>a</sup>Overlapping signals

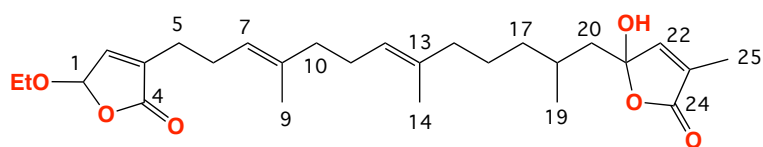

**Table S5.** NMR (600 MHz, CDCl<sub>3</sub>) data for cacolide E (**5**)

| no.                              | $\delta_C$ | $\delta_H$ , mult. ( <i>J</i> in Hz) | COSY                                                                 | HMBC                                       | ROESY                            |
|----------------------------------|------------|--------------------------------------|----------------------------------------------------------------------|--------------------------------------------|----------------------------------|
| 1                                | 101.6      | 5.80, br s                           | 2                                                                    | OCH <sub>2</sub> CH <sub>3</sub> , 2, 3, 4 | OCH <sub>2</sub> CH <sub>3</sub> |
| 2                                | 142.5      | 6.78, d (1.4)                        | 1, 5                                                                 | 1, 3, 4, 5                                 |                                  |
| 3                                | 138.3      |                                      |                                                                      |                                            |                                  |
| 4                                | 172.0      |                                      |                                                                      |                                            |                                  |
| 5                                | 25.5       | 2.33, t (7.3)                        | 2, 6                                                                 | 2, 3, 4, 6, 7                              | 7                                |
| 6                                | 25.7       | 2.26, dt (7.2, 7.3)                  | 5, 7                                                                 | 5, 7, 8                                    |                                  |
| 7                                | 122.7      | 5.10, br t (7.2)                     | 6, 9, 10                                                             | 6, 9, 10                                   | 5, 10                            |
| 8                                | 136.9      |                                      |                                                                      |                                            |                                  |
| 9                                | 16.0       | 1.59, s                              | 7, 10                                                                | 7, 8, 10, 11                               |                                  |
| 10                               | 39.7       | 1.99, t (7.0)                        | 7, 9, 11                                                             | 7, 8, 9, 11, 12                            | 7                                |
| 11                               | 26.5       | 2.06, dt (7.3, 7.0)                  | 10, 12, 14                                                           | 8, 10, 12, 13                              |                                  |
| 12                               | 124.2      | 5.06, br t (7.3)                     | 11, 14, 15                                                           | 11, 14, 15                                 | 15                               |
| 13                               | 135.3      |                                      |                                                                      |                                            |                                  |
| 14                               | 16.2       | 1.57, s                              | 11, 12, 15                                                           | 12, 13, 15                                 |                                  |
| 15                               | 39.8       | 1.93 <sup>a</sup> , m                | 12, 16                                                               | 12, 13, 14, 16, 17                         | 12                               |
| 16                               | 25.2       | 1.36, m                              | 15, 17                                                               | 13, 15, 17, 18                             |                                  |
| 17                               | 37.3       | a 1.27 <sup>b</sup> , m<br>b 1.15, m | 17b<br>17a, 18                                                       | 15, 16, 18, 19, 20                         |                                  |
| 18                               | 28.7       | 1.67, m                              | 17b, 19, 20                                                          |                                            |                                  |
| 19                               | 21.2       | 0.96, s                              | 18                                                                   | 17, 18, 20                                 |                                  |
| 20                               | 44.8       | a. 1.93 <sup>a</sup><br>b. 1.73, m   | 20b<br>20a                                                           | 21                                         |                                  |
| 21                               | 106.1      |                                      |                                                                      |                                            |                                  |
| 22                               | 147.6      | 6.83, br s                           | 25                                                                   | 21, 24, 23                                 | 18                               |
| 23                               | 132.0      |                                      |                                                                      |                                            |                                  |
| 24                               | 172.0      |                                      |                                                                      |                                            |                                  |
| 25                               | 10.6       | 1.93 <sup>a</sup> , s                | 22                                                                   | 22, 23, 24                                 |                                  |
| OCH <sub>2</sub> CH <sub>3</sub> | 66.0       | a 3.91, m<br>b 3.73, m               | OCH <sub>2</sub> CH <sub>3</sub><br>OCH <sub>2</sub> CH <sub>3</sub> | 1, OCH <sub>2</sub> CH <sub>3</sub>        | 1                                |
| OCH <sub>2</sub> CH <sub>3</sub> | 15.2       | 1.27 <sup>b</sup> , t (7.0)          | OCH <sub>2</sub> CH <sub>3</sub>                                     | OCH <sub>2</sub> CH <sub>3</sub>           |                                  |

<sup>a, b</sup> Overlapping signals

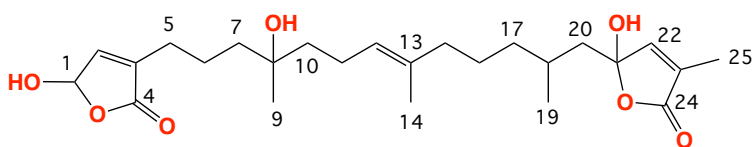

**Table S6.** NMR (600 MHz, CDCl<sub>3</sub>) data for cacolide F (**6**)

| no. | $\delta_C$        | $\delta_H$ , mult. ( <i>J</i> in Hz)         | COSY       | HMBC       |
|-----|-------------------|----------------------------------------------|------------|------------|
| 1   | 96.9              | 6.05, br s                                   | 2          |            |
| 2   | 143.8             | 6.89, br s                                   | 1          | 1, 3, 4    |
| 3   | 137.8             |                                              |            |            |
| 4   | 172.3             |                                              |            |            |
| 5   | 25.5              | 2.32, m                                      | 6          |            |
| 6   | 21.6              | 1.64 <sup>a</sup>                            | 5, 7       | 5, 7, 8    |
| 7   | 41.5 <sup>d</sup> | a. 1.55 <sup>b</sup><br>b. 1.50 <sup>c</sup> | 6          | 5, 8       |
| 8   | 73.5              |                                              |            |            |
| 9   | 26.4              | 1.19, s                                      |            | 8, 10      |
| 10  | 41.5 <sup>d</sup> | a 1.55 <sup>b</sup><br>b 1.50 <sup>c</sup>   | 11         | 12         |
| 11  | 22.9              | 2.07, m                                      | 10, 12     |            |
| 12  | 125.1             | 5.27 (m)                                     | 11, 14     |            |
| 13  | 135.2             |                                              |            |            |
| 14  | 16.1              | 1.64 <sup>a</sup> , br s                     | 12         |            |
| 15  | 39.3              | 1.97, m                                      | 16         |            |
| 16  | 24.6              | 1.41, m                                      | 15, 17     |            |
| 17  | 36.6              | a 1.31, m<br>b 1.11, m                       | 17b<br>17a |            |
| 18  | 28.6              | 1.70, m                                      | 19         |            |
| 19  | 21.1              | 0.94, br d (7.0)                             | 18         | 17, 18, 20 |
| 20  | 45.4 <sup>*</sup> | #                                            |            |            |
| 21  | 107.5             |                                              |            |            |
| 22  | 147.6             | 6.85, br s                                   | 25         |            |
| 23  | 131.7             |                                              |            |            |
| 24  | 172.0             |                                              |            |            |
| 25  | 10.7              | 1.91, s                                      | 22         | 22, 23, 24 |

<sup>a-c</sup> Overlapping signals

<sup>d</sup> Signals are interchangeable

<sup>\*</sup> Detected from HMBC

<sup>#</sup> Not detected

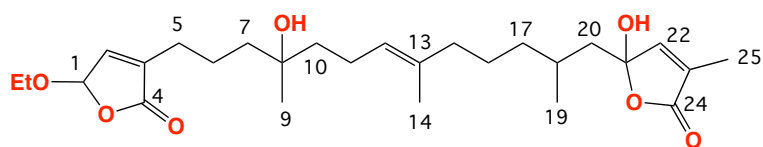

**Table S7.** NMR (600 MHz, CDCl<sub>3</sub>) data for cacolide G (7)

| no.                              | $\delta_C$        | $\delta_H$ , mult. ( <i>J</i> in Hz)         | COSY                                                                 | HMBC                                    |
|----------------------------------|-------------------|----------------------------------------------|----------------------------------------------------------------------|-----------------------------------------|
| 1                                | 101.8             | 5.82, br s                                   | 2                                                                    | OCH <sub>2</sub> CH <sub>3</sub> , 3, 4 |
| 2                                | 142.6             | 6.81, br s                                   | 1, 5                                                                 | 4, 1, 3                                 |
| 3                                | 138.5             |                                              |                                                                      |                                         |
| 4                                | 171.9             |                                              |                                                                      | 2, 1                                    |
| 5                                | 25.9              | 2.30, (7.3)                                  | 2, 6                                                                 | 6, 7, 3, 2, 4                           |
| 6                                | 21.9              | 1.64 <sup>a</sup>                            | 5, 7                                                                 | 5                                       |
| 7                                | 41.6 <sup>d</sup> | a. 1.64 <sup>a</sup><br>b. 1.51 <sup>b</sup> | 6                                                                    | 8, 5, 10, 6                             |
| 8                                | 73.1              |                                              |                                                                      |                                         |
| 9                                | 26.9              | 1.18, s                                      |                                                                      | 10, 8, 7                                |
| 10                               | 41.6 <sup>d</sup> | a 1.64 <sup>a</sup><br>b 1.51 <sup>b</sup>   | 11                                                                   | 9, 7, 8, 11                             |
| 11                               | 22.8              | 2.05, m                                      | 10, 12                                                               | 13, 10, 12                              |
| 12                               | 125.0             | 5.15, m                                      | 11, 14                                                               |                                         |
| 13                               | 135.9             |                                              |                                                                      |                                         |
| 14                               | 16.0              | 1.60, br s                                   | 12                                                                   | 15, 12, 13                              |
| 15                               | 39.5              | 1.96, m                                      | 16                                                                   | 13, 16, 12                              |
| 16                               | 25.1              | 1.36, m                                      | 15                                                                   |                                         |
| 17                               | 37.5              | a 1.33, m<br>b 1.13, m                       | 17b<br>17a                                                           |                                         |
| 18                               | 28.6              | 1.66, m                                      | 19                                                                   |                                         |
| 19                               | 21.0              | 0.96, br d (6.8)                             | 18, 20a                                                              | 17, 18, 20                              |
| 20                               | 45.1              | a 1.93 <sup>c</sup> , m<br>b 1.72, m         | 20b, 19<br>20a                                                       | 19                                      |
| 21                               | 106.0             |                                              |                                                                      |                                         |
| 22                               | 147.5             | 6.83, br s                                   | 25                                                                   | 21, 24                                  |
| 23                               | 132.3             |                                              |                                                                      |                                         |
| 24                               | 173.0             |                                              |                                                                      |                                         |
| 25                               | 10.6              | 1.93 <sup>c</sup> , s                        | 22                                                                   | 23, 22, 24                              |
| OCH <sub>2</sub> CH <sub>3</sub> | 66.2              | a 3.93, m<br>b 3.74, m                       | OCH <sub>2</sub> CH <sub>3</sub><br>OCH <sub>2</sub> CH <sub>3</sub> | 1, OCH <sub>2</sub> CH <sub>3</sub>     |
| OCH <sub>2</sub> CH <sub>3</sub> | 15.2              | 1.27, t (7)                                  | OCH <sub>2</sub> CH <sub>3</sub>                                     | OCH <sub>2</sub> CH <sub>3</sub>        |

<sup>a-c</sup>Overlapping signals

<sup>d</sup>Signals are interchangeable

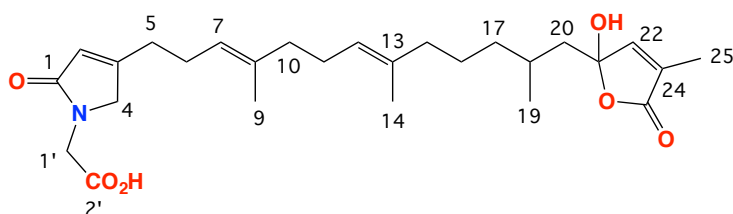

**Table S8.** NMR (600 MHz, CDCl<sub>3</sub>) data for cacolide H (**8**)

| no. | $\delta_C$ | $\delta_H$ , mult. ( <i>J</i> in Hz) | COSY                   | HMBC               | ROESY   |
|-----|------------|--------------------------------------|------------------------|--------------------|---------|
| 1   | 173.5      |                                      |                        |                    |         |
| 2   | 121.0      | 5.91, br s                           | 5, 4                   | 4, 1, 5, 3         | 5       |
| 3   | 162.3      |                                      |                        |                    |         |
| 4   | 55.7       | 4.04, br s                           | 2                      | 2, 1               | 5, 6    |
| 5   | 30.0       | 2.43, t (7.5)                        | 2, 6                   | 2, 3, 4, 6, 7      | 2, 4, 7 |
| 6   | 26.0       | 2.28, m                              | 5, 7                   | 5, 7, 8, 3         | 4       |
| 7   | 122.8      | 5.09, br t (7.0)                     | 6, 9, 10               | 9, 10, 5, 6        | 5, 10   |
| 8   | 136.8      |                                      |                        |                    |         |
| 9   | 16.2       | 1.60, s                              | 7, 10                  | 10, 8, 7           |         |
| 10  | 39.6       | 2.02, m                              | 9, 7, 11               | 11, 9, 7, 8        | 7, 12   |
| 11  | 26.2       | 2.09, m                              | 10, 12                 | 8, 10, 12, 13      |         |
| 12  | 124.1      | 5.04, br t (7.0)                     | 11, 14, 15             | 14, 11, 15         | 10, 15  |
| 13  | 135.3      |                                      |                        |                    |         |
| 14  | 16.1       | 1.56, br s                           | 11, 12, 15             | 12, 13             |         |
| 15  | 39.8       | 1.92, m                              | 12, 14, 16             | 12, 14, 17, 16, 13 | 12      |
| 16  | 25.1       | 1.36, m                              | 15, 17                 | 17                 |         |
| 17  | 37.4       | a. 1.30, m<br>b. 1.14, m             | 17b, 16<br>17a, 16, 18 |                    |         |
| 18  | 28.6       | 1.64, m                              | 19, 17b                |                    |         |
| 19  | 21.1       | 0.94, br d (7.0)                     | 18                     | 17, 18, 20         |         |
| 20  | 44.8       | a 1.95, m<br>b 1.70, m               | 20b<br>20a             |                    |         |
| 21  | 107.5      |                                      |                        |                    |         |
| 22  | 148.0      | 6.82, br s                           | 25                     |                    |         |
| 23  | 131.7      |                                      |                        |                    |         |
| 24  | 172.4      |                                      |                        |                    |         |
| 25  | 10.8       | 1.90, s                              | 22                     | 22, 23, 24         |         |
| 1'  | 43.7       | a 4.22, m<br>b 4.18, m               |                        | 2'                 |         |
| 2'  | 171.7      |                                      |                        |                    |         |



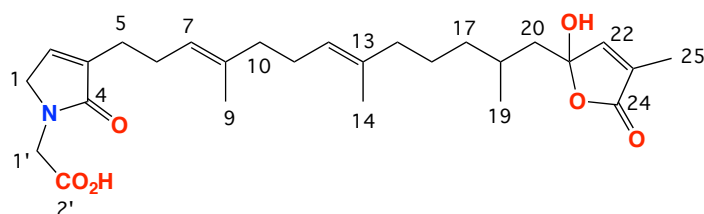

**Table S9.** NMR (600 MHz, CDCl<sub>3</sub>) data for cacolide I (**9**)

| no. | $\delta_C$ | $\delta_H$ , mult. ( <i>J</i> in Hz) | COSY               | HMBC               | ROESY  |
|-----|------------|--------------------------------------|--------------------|--------------------|--------|
| 1   | 52.1       | 4.03, br s                           | 2                  | 2, 3               | 2      |
| 2   | 136.9      | 6.77, br s                           | 1, 5               | 4, 1, 3, 5         | 1, 5   |
| 3   | 139.2      |                                      |                    |                    |        |
| 4   | 173.3      |                                      |                    |                    |        |
| 5   | 25.9       | 2.30, t (7.2)                        | 2, 6               | 2, 3, 4, 6, 7      | 2, 7   |
| 6   | 26.0       | 2.24, dt (7.3, 7.3)                  | 7, 5, 10           | 3, 5, 7, 8         |        |
| 7   | 123.7      | 5.11, br t (7.3)                     | 6, 9, 10           | 9, 10, 5           | 5, 10  |
| 8   | 135.9      |                                      |                    |                    |        |
| 9   | 16.1       | 1.59, s                              | 7, 10              | 7, 10, 8           |        |
| 10  | 39.5       | 2.01, t (7.0)                        | 6, 7, 9, 11        | 8, 9, 11, 12       | 7, 12  |
| 11  | 26.1       | 2.08, dt (7.0, 7.0)                  | 10, 12, 14         | 10, 12, 13         |        |
| 12  | 124.3      | 5.04, br t (7.0)                     | 11, 14, 15         | 14, 11, 15         | 10, 15 |
| 13  | 135.4      |                                      |                    |                    |        |
| 14  | 16.0       | 1.56, s                              | 11, 12, 15         | 15, 12, 13         |        |
| 15  | 39.8       | 1.92, m                              | 12, 14, 16         | 12, 16, 13, 14, 17 | 12     |
| 16  | 25.1       | 1.36, m                              | 15, 17a            | 13, 15             |        |
| 17  | 37.0       | a 1.27, m<br>b 1.13, m               | 17b<br>17a, 16, 18 | 15                 |        |
| 18  | 29.1       | 1.62, m                              | 19, 17a            |                    |        |
| 19  | 21.1       | 0.94, br s                           | 18                 | 17, 18, 20         |        |
| 20  | 44.8       | a 1.95, m<br>b 1.69, m               | 20b<br>20a         |                    |        |
| 21  | 107.5      |                                      |                    |                    |        |
| 22  | 148.0      | 6.83, br s                           | 25                 | 21, 24             |        |
| 23  | 131.7      |                                      |                    |                    |        |
| 24  | 171.9      |                                      |                    |                    |        |
| 25  | 10.6       | 1.90, s                              | 22                 | 22, 23, 24         |        |
| 1'  | 44.1       | a 4.28, m<br>b 4.25, m               |                    | 1, 4, 2'           |        |
| 2'  | 172.6      |                                      |                    |                    |        |

<sup>a, b</sup> Overlapping signals

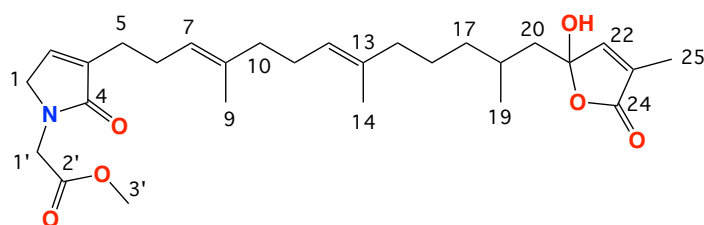

**Table S10.** NMR (600 MHz, CDCl<sub>3</sub>) data for cacolide J (**10**)

| no. | $\delta_C$ | $\delta_H$ , mult. ( <i>J</i> in Hz) | COSY                   | HMBC               |
|-----|------------|--------------------------------------|------------------------|--------------------|
| 1   | 51.7       | 4.00, br s                           | 2                      | 2, 3, 4            |
| 2   | 136.0      | 6.74, br s                           | 1, 5                   | 1, 3, 4, 5         |
| 3   | 139.9      |                                      |                        |                    |
| 4   | 173.1      |                                      |                        |                    |
| 5   | 26.3       | 2.32, t (7.2)                        | 2, 6                   | 2, 3, 4, 6, 7      |
| 6   | 26.1       | 2.25, dt (7.3, 7.3)                  | 7, 5, 10               | 3, 5, 7, 8         |
| 7   | 124.1      | 5.15, br t (7.3)                     | 6, 9, 10               | 5, 9, 10           |
| 8   | 135.6      |                                      |                        |                    |
| 9   | 16.1       | 1.60, s                              | 7, 10                  | 7, 8, 10           |
| 10  | 39.6       | 2.03, t (7.0)                        | 6, 7, 9, 11            | 8, 9, 11, 12       |
| 11  | 25.9       | 2.10, dt (7.0, 7.0)                  | 10, 12, 14             | 10, 12, 13         |
| 12  | 124.2      | 5.06, br t (7.0)                     | 11, 14, 15             | 11, 14, 15         |
| 13  | 135.2      |                                      |                        |                    |
| 14  | 16.0       | 1.56, s                              | 11, 12, 15             | 12, 13, 15         |
| 15  | 39.9       | 1.93, m                              | 12, 14, 16             | 12, 13, 14, 16, 17 |
| 16  | 25.1       | 1.37, m                              | 15, 17                 | 13, 15, 17, 18     |
| 17  | 37.8       | a 1.28, m<br>b 1.16, m               | 17b, 16<br>17a, 16, 18 | 15, 18             |
| 18  | 28.8       | 1.64, m                              | 19, 17b                |                    |
| 19  | 21.4       | 0.95, br s                           | 18                     | 17, 18, 20         |
| 20  | 44.9       | a 2.00, m<br>b 1.71, m               | 20b<br>20a             |                    |
| 21  |            |                                      |                        |                    |
| 22  | 148.1      | 6.83, br s                           | 25                     |                    |
| 23  | 132.0      |                                      |                        |                    |
| 24  | 175.5      |                                      |                        |                    |
| 25  | 10.7       | 1.91, s                              | 22                     | 22, 23, 24         |
| 1'  | 43.8       | a 4.25, m<br>b 4.21, m               | 1'b, 3'<br>1'a, 3'     | 2'                 |
| 2'  | 170.3      |                                      |                        |                    |
| 3'  | 52.4       | 3.74, s                              | 1'                     | 2'                 |

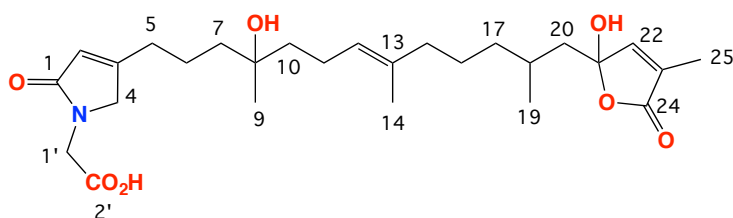

**Table S11.** NMR (600 MHz, CDCl<sub>3</sub>) data for cacolide K (**11**)

| no. | $\delta_C$        | $\delta_H$ , mult. ( <i>J</i> in Hz)       | COSY       | HMBC       | ROESY  |
|-----|-------------------|--------------------------------------------|------------|------------|--------|
| 1   | 173.2             |                                            |            |            |        |
| 2   | 121.5             | 5.93, br s                                 | 4, 5       | 1, 4       | 5      |
| 3   | 161.8             |                                            |            |            |        |
| 4   | 55.6              | 4.04, br s                                 | 2          | 1, 2, 3    | 5, 6   |
| 5   | 30.3              | 2.40, t (7.5)                              | 2, 6       | 2, 3       | 2, 4   |
| 6   | 22.3              | 1.66 <sup>a</sup> , m                      | 7, 5       |            | 4      |
| 7   | 41.5 <sup>d</sup> | a 1.54 <sup>b</sup><br>b 1.52 <sup>c</sup> | 6          | 6, 8       |        |
| 8   | 72.7              |                                            |            |            |        |
| 9   | 27.0              | 1.19, s                                    | 10         | 7, 8, 10   |        |
| 10  | 41.5 <sup>d</sup> | a 1.54 <sup>b</sup><br>b 1.52 <sup>c</sup> | 9, 11      | 11, 12, 8  | 12     |
| 11  | 23.0              | 2.07, m                                    | 10, 12     | 12, 13     |        |
| 12  | 125.0             | 5.15, br t (7.0)                           | 11, 14     |            | 10, 15 |
| 13  | 134.8             |                                            |            |            |        |
| 14  | 16.1              | 1.59, br s                                 | 12         | 15, 12, 13 |        |
| 15  | 39.5              | 1.96, m                                    | 16         | 13         | 12     |
| 16  | 24.7              | 1.39, m                                    | 15         |            |        |
| 17  | 37.1              | a 1.32, m<br>b 1.11, m                     | 17b<br>17a |            |        |
| 18  | 28.6              | 1.66 <sup>a</sup> , m                      | 19         |            |        |
| 19  | 21.3              | 0.94, br d (7.0)                           | 18         | 17, 18, 20 |        |
| 20  | 44.9 <sup>*</sup> | #                                          |            |            |        |
| 21  | #                 |                                            |            |            |        |
| 22  | 147.5             | 6.81, br s                                 | 25         |            |        |
| 23  | 132.0             |                                            |            |            |        |
| 24  | 172.0             |                                            |            |            |        |
| 25  | 10.6              | 1.91, s                                    | 22         | 22, 23, 24 |        |
| 1'  | 44.1              | 4.21, br s                                 |            | 2'         |        |
| 2'  | 171.6             |                                            |            |            |        |

<sup>a-c</sup>Overlapping signals

<sup>d</sup>Signals are interchangeable

<sup>\*</sup>Detected from HMBC

<sup>#</sup>Not detected

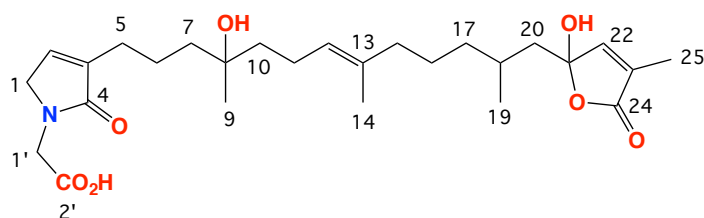

**Table S12.** NMR (600 MHz, CDCl<sub>3</sub>) data for cacolide L (**12**)

| Pos. | $\delta_C$        | $\delta_H$ , mult. ( <i>J</i> in Hz)         | COSY       | HMBC       | ROESY  |
|------|-------------------|----------------------------------------------|------------|------------|--------|
| 1    | 52.1              | 4.02, br s                                   | 2          | 2, 3       | 2      |
| 2    | 136.9             | 6.78, br s                                   | 5, 1       | 4, 1       | 1, 5   |
| 3    | 139.4             |                                              |            |            |        |
| 4    | 173.0             |                                              |            |            |        |
| 5    | 26.5              | 2.32, t (7.5)                                | 2, 6       | 2, 3, 4, 6 | 2      |
| 6    | 22.3              | 1.61, m                                      | 5, 7       |            |        |
| 7    | 41.5 <sup>e</sup> | a. 1.52 <sup>a</sup><br>b. 1.50 <sup>b</sup> | 6          | 8, 9, 10   |        |
| 8    | 73.4              |                                              |            |            |        |
| 9    | 26.8              | 1.18 (s)                                     |            | 8, 10      |        |
| 10   | 41.5 <sup>e</sup> | a 1.52 <sup>a</sup><br>b 1.50 <sup>b</sup>   | 11         | 11, 12     | 12     |
| 11   | 22.8              | 2.05, m                                      | 10, 12     | 10, 12, 13 |        |
| 12   | 125.1             | 5.14, br t (7.0)                             | 11, 14     | 14, 11, 15 | 10, 15 |
| 13   | 135.4             |                                              |            |            |        |
| 14   | 15.9              | 1.59, br s                                   | 12         | 15, 12, 13 |        |
| 15   | 39.4              | 1.95 <sup>d</sup>                            | 16         | 16, 13     | 12     |
| 16   | 24.5              | 1.39, m                                      | 15         |            |        |
| 17   | 37.0              | a 1.33, m<br>b 1.10, m                       | 17b<br>17a |            |        |
| 18   | 28.5              | 1.65, m                                      | 19         |            |        |
| 19   | 21.1              | 0.94, br d (7.0)                             | 18         | 17, 18, 20 |        |
| 20   | 45.2              | a 1.95 <sup>d</sup><br>b 1.73, m             | 20b<br>20a |            |        |
| 21   | 107.8             |                                              |            |            |        |
| 22   | 148.1             | 6.83, s                                      | 25         |            |        |
| 23   | 131.7             |                                              |            |            |        |
| 24   | 172.4             |                                              |            |            |        |
| 25   | 10.8              | 1.90, s                                      | 22         | 22, 23, 24 |        |
| 1'   | 44.4              | 4.23, s                                      |            | 4, 2'      |        |
| 2'   | 171.3             |                                              |            |            |        |

<sup>a-d</sup>Overlapping signals

<sup>e</sup>Signals are interchangeable

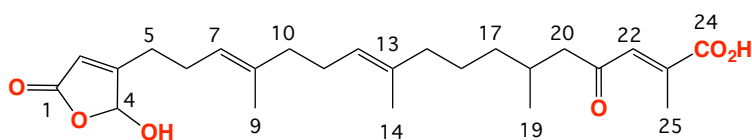

**Table S13.** NMR (600 MHz, CDCl<sub>3</sub>) data for cacolic acid A (**13**)

| no. | $\delta_C$ | $\delta_H$ , mult. ( <i>J</i> in Hz) | COSY                       | HMBC               | ROESY  |
|-----|------------|--------------------------------------|----------------------------|--------------------|--------|
| 1   | 171.4      |                                      |                            |                    |        |
| 2   | 118.0      | 5.85, br s                           | 4, 5                       | 1, 4               | 6      |
| 3   | 169.5      |                                      |                            |                    |        |
| 4   | 99.3       | 5.99, br s                           | 2                          | 1                  |        |
| 5   | 27.9       | 2.46, m                              | 2, 6                       | 3                  | 7      |
| 6   | 25.3       | 2.32, m                              | 7, 5                       | 7, 8, 3            | 2      |
| 7   | 122.6      | 5.09, br t (7.3)                     | 6, 9, 10                   | 9, 10, 6           | 5, 10  |
| 8   | 137.3      |                                      |                            |                    |        |
| 9   | 16.2       | 1.59, br s                           | 7                          | 10, 8, 7           |        |
| 10  | 39.4       | 2.03 <sup>a</sup>                    | 7, 11                      | 7, 8, 9, 11, 12    | 7, 12  |
| 11  | 26.1       | 2.09 (m)                             | 10, 12                     | 8, 12, 13          |        |
| 12  | 124.1      | 5.03, br t (7.0)                     | 11, 14, 15                 | 14, 11, 15         | 10, 15 |
| 13  | 135.5      |                                      |                            |                    |        |
| 14  | 16.1       | 1.57, br s                           | 12                         | 15, 12, 13         |        |
| 15  | 39.7       | 1.94, m                              | 12, 16                     | 12, 13, 14, 16, 17 | 12     |
| 16  | 25.2       | 1.37, m                              | 15, 17                     | 17                 |        |
| 17  | 36.4       | a 1.25, m<br>b 1.15, m               | 17b, 16, 18<br>17a, 18, 16 |                    |        |
| 18  | 29.7       | 2.03 <sup>a</sup>                    | 17, 19, 20                 | 19, 20             |        |
| 19  | 20.1       | 0.91, br d (6.7)                     | 18                         | 17, 18, 20         |        |
| 20  | 52.6       | a 2.53, m<br>b 2.35, m               | 20b, 18<br>20a, 18         | 18, 19, 21         | 22     |
| 21  | 202.9      |                                      |                            |                    |        |
| 22  | 133.8      | 7.11, br s                           | 25                         | 21, 24, 25         | 20     |
| 23  | 140.5      |                                      |                            |                    |        |
| 24  | 170.7      |                                      |                            |                    |        |
| 25  | 14.4       | 2.20, s                              | 22                         | 22, 23, 24         |        |

<sup>a</sup> Overlapping signals

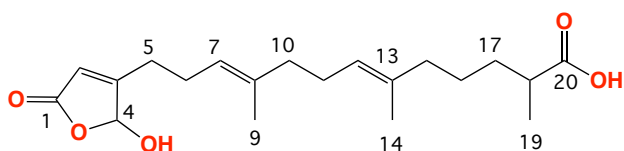

**Table S14.** NMR (600 MHz, CDCl<sub>3</sub>) data for cacolic acid B (**14**)

| no. | $\delta_C$ | $\delta_H$ , mult. ( <i>J</i> in Hz)       | COSY               | HMBC               | ROESY       |
|-----|------------|--------------------------------------------|--------------------|--------------------|-------------|
| 1   | 171.4      |                                            |                    |                    |             |
| 2   | 118.0      | 5.88, br s                                 | 4, 5               | 5, 4, 1, 3         | 5, 6, 7     |
| 3   | 169.5      |                                            |                    |                    |             |
| 4   | 99.3       | 6.01, br                                   | 2                  | 2, 1               | 5, 6        |
| 5   | 27.9       | 2.47 <sup>a</sup>                          | 2, 6               |                    | 2, 4, 7     |
| 6   | 25.3       | 2.33, m                                    | 5, 7               | 5, 7, 8, 3         | 2, 4, 7     |
| 7   | 122.8      | 5.10, br t (7.3)                           | 6, 9, 10           | 9, 10, 5           | 2, 5, 6, 10 |
| 8   | 137.0      |                                            |                    |                    |             |
| 9   | 16.1       | 1.64 <sup>b</sup> , br s                   | 7                  | 10, 8, 7           |             |
| 10  | 39.4       | 2.06, m                                    | 7, 11              | 7, 8, 12           | 7           |
| 11  | 25.8       | 2.12, m                                    | 10, 12             | 8, 10, 12, 13      |             |
| 12  | 124.1      | 5.06, br t (7.0)                           | 11, 14             | 14, 11, 15         | 15, 16      |
| 13  | 135.2      |                                            |                    |                    |             |
| 14  | 16.1       | 1.59, br s                                 | 12                 | 15, 12, 13         |             |
| 15  | 39.5       | 1.98, m                                    | 16                 | 12, 13, 14, 16, 17 | 12          |
| 16  | 25.6       | 1.42 <sup>c</sup>                          | 15, 17b            | 17                 | 12          |
| 17  | 33.4       | a 1.64 <sup>b</sup><br>b 1.42 <sup>c</sup> | 17b, 18<br>17a, 16 | 16, 20             |             |
| 18  | 39.2       | 2.47 <sup>a</sup>                          | 17a, 19            | 19, 17, 20, 16     | 19          |
| 19  | 17.2       | 1.19, br d (7.2)                           | 18                 | 17, 18, 20         | 18          |
| 20  | 180.2      |                                            |                    |                    |             |

<sup>a-c</sup>Overlapping signals

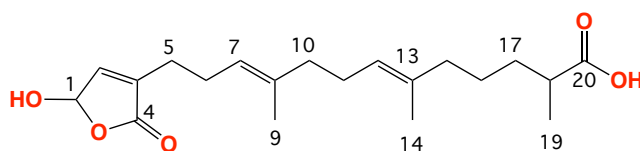

**Table S15.** NMR (600 MHz, CDCl<sub>3</sub>) data for cacolic acid C (**15**)

| no. | $\delta_C$ | $\delta_H$ , mult. ( <i>J</i> in Hz)       | COSY                   | HMBC               | ROESY    |
|-----|------------|--------------------------------------------|------------------------|--------------------|----------|
| 1   | 97.2       | 6.09, br s                                 | 2                      | 3, 4               | 2        |
| 2   | 143.9      | 6.84, br s                                 | 1, 5                   | 1, 3, 4            | 1, 5, 6  |
| 3   | 138.6      |                                            |                        |                    |          |
| 4   | 172.3      |                                            |                        |                    |          |
| 5   | 25.3       | 2.32, t (7.3)                              | 2, 6                   | 2, 3, 4, 6, 7      | 2, 7     |
| 6   | 25.6       | 2.25, dt (7.3, 7.2)                        | 5, 7                   | 5, 7, 8            | 2, 7     |
| 7   | 123.0      | 5.09 (br t, 7.2)                           | 6, 9                   | 9, 10, 5           | 5, 6, 10 |
| 8   | 137.3      |                                            |                        |                    |          |
| 9   | 16.2       | 1.64 <sup>a</sup> , s                      | 7                      | 7, 8, 10           |          |
| 10  | 39.6       | 2.02, br t (7.0)                           | 11                     | 8, 9, 11, 12       | 7        |
| 11  | 26.1       | 2.09, dt (7.2, 7.0)                        | 10, 12                 | 10, 12, 13         |          |
| 12  | 124.4      | 5.04, br t (7.2)                           | 11, 14                 | 14, 11, 15         | 15       |
| 13  | 135.6      |                                            |                        |                    |          |
| 14  | 16.2       | 1.57, s                                    | 11, 12                 | 15, 12, 13         |          |
| 15  | 39.6       | 1.96, m                                    | 16                     | 16, 13, 12, 14, 17 |          |
| 16  | 25.6       | 1.42 <sup>b</sup>                          | 15, 17a                | 17                 |          |
| 17  | 33.6       | a 1.64 <sup>a</sup><br>b 1.42 <sup>b</sup> | 16, 17b, 18<br>17a, 18 | 16, 20             |          |
| 18  | 39.1       | 2.47, m                                    | 17a, 17b, 19           | 17, 16             | 19       |
| 19  | 17.3       | 1.17, br d (7.0)                           | 18                     | 17, 18, 20         | 18       |
| 20  | 180.4      |                                            |                        |                    |          |

<sup>a, b</sup> Overlapping signals

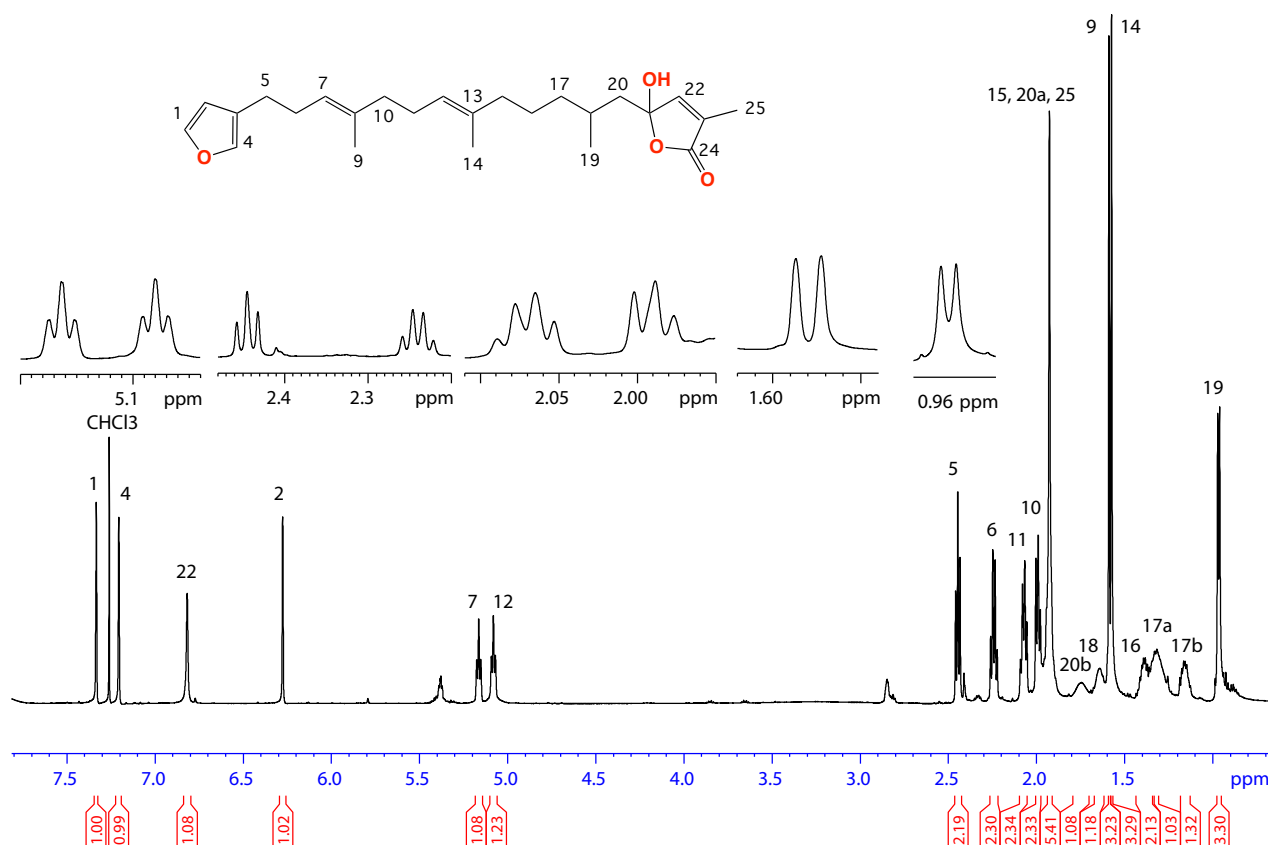

Figure S7.  $^1\text{H}$  NMR (600 MHz,  $\text{CDCl}_3$ ) spectrum of cacolide A (1)

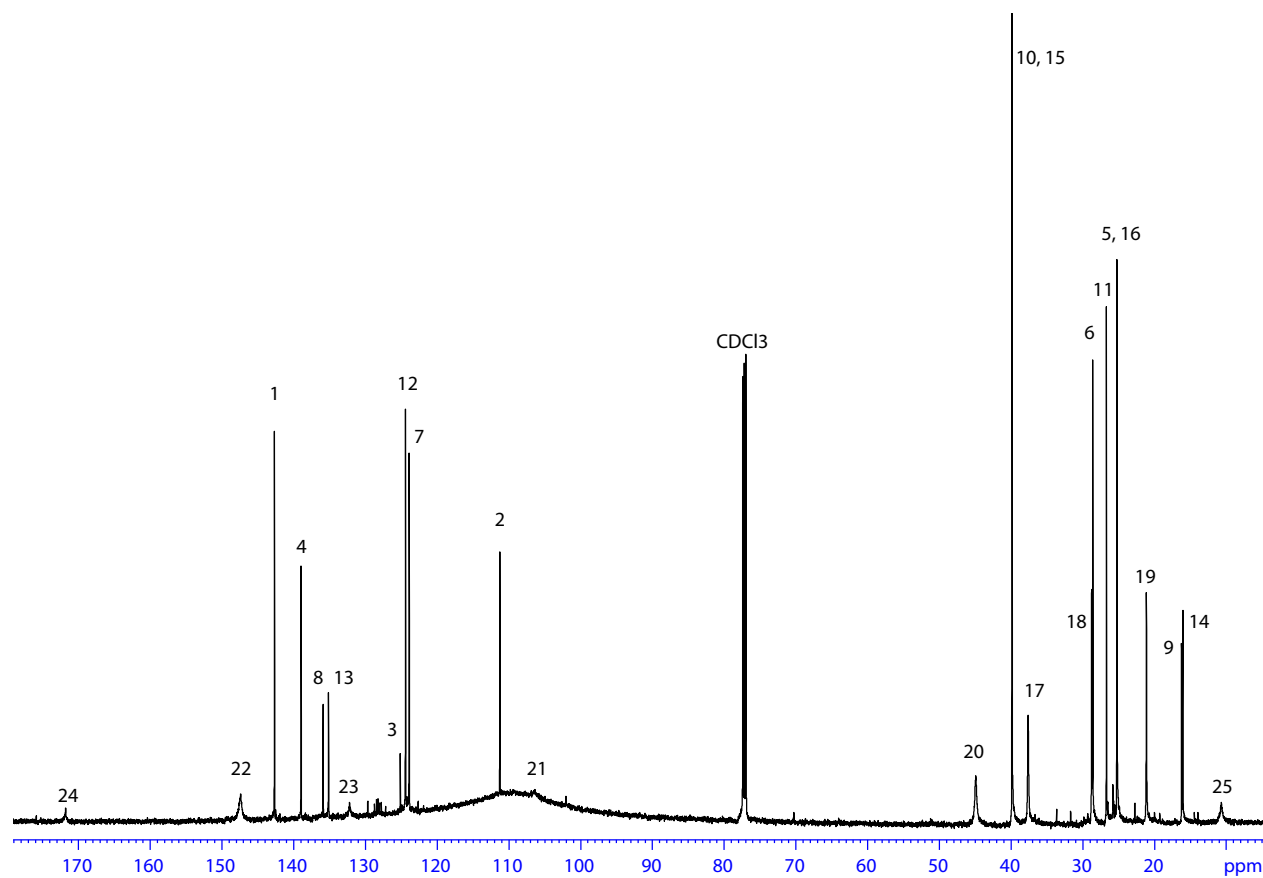

Figure S8.  $^{13}\text{C}$  NMR (150 MHz,  $\text{CDCl}_3$ ) spectrum of cacolide A (1)



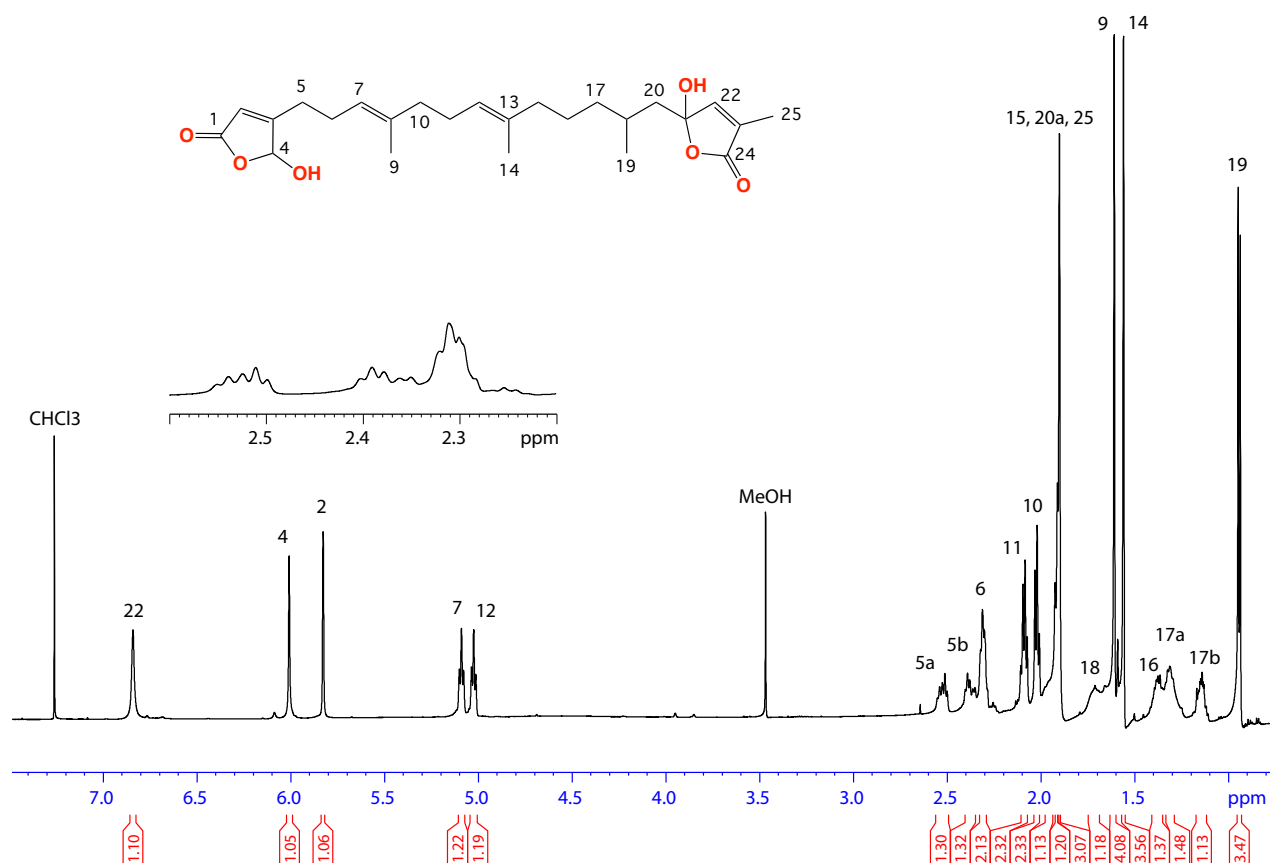

**Figure S9.**  $^1\text{H}$  NMR (600 MHz,  $\text{CDCl}_3$ ) spectrum of cacolide B (2)

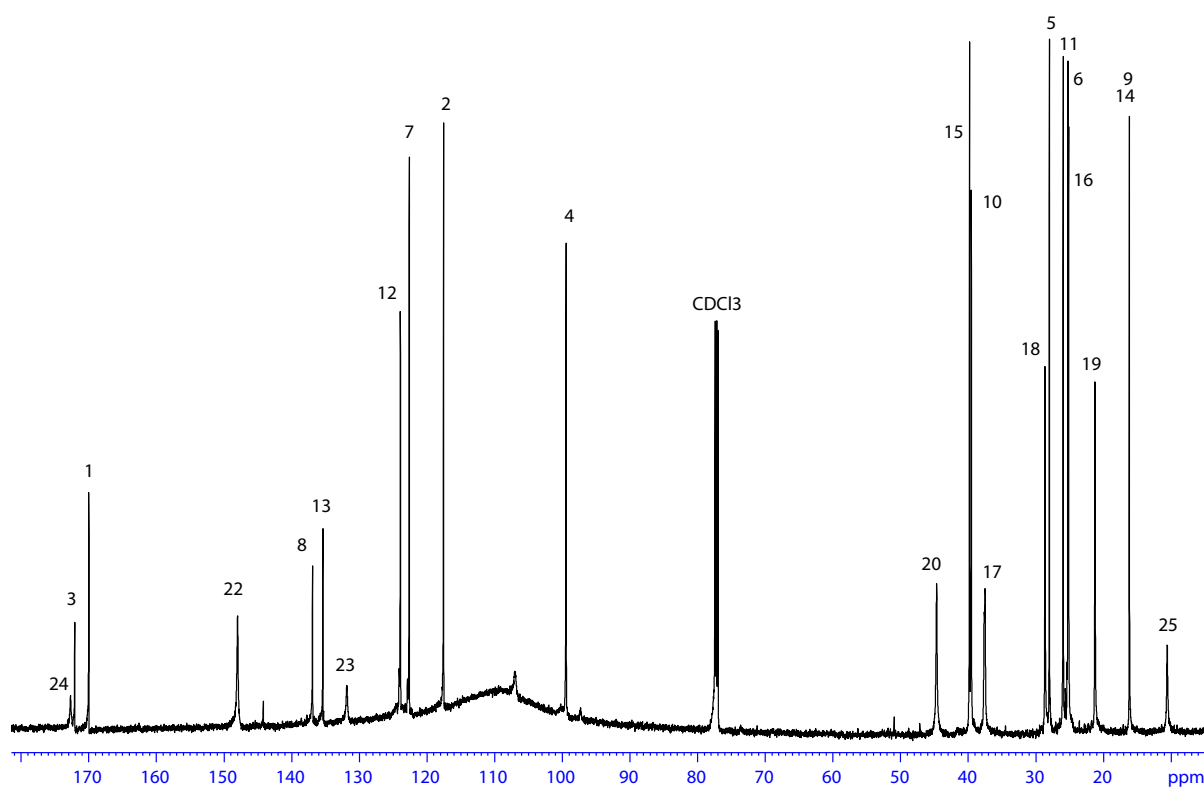

**Figure S10.**  $^{13}\text{C}$  NMR (150 MHz,  $\text{CDCl}_3$ ) spectrum of cacolide B (2)

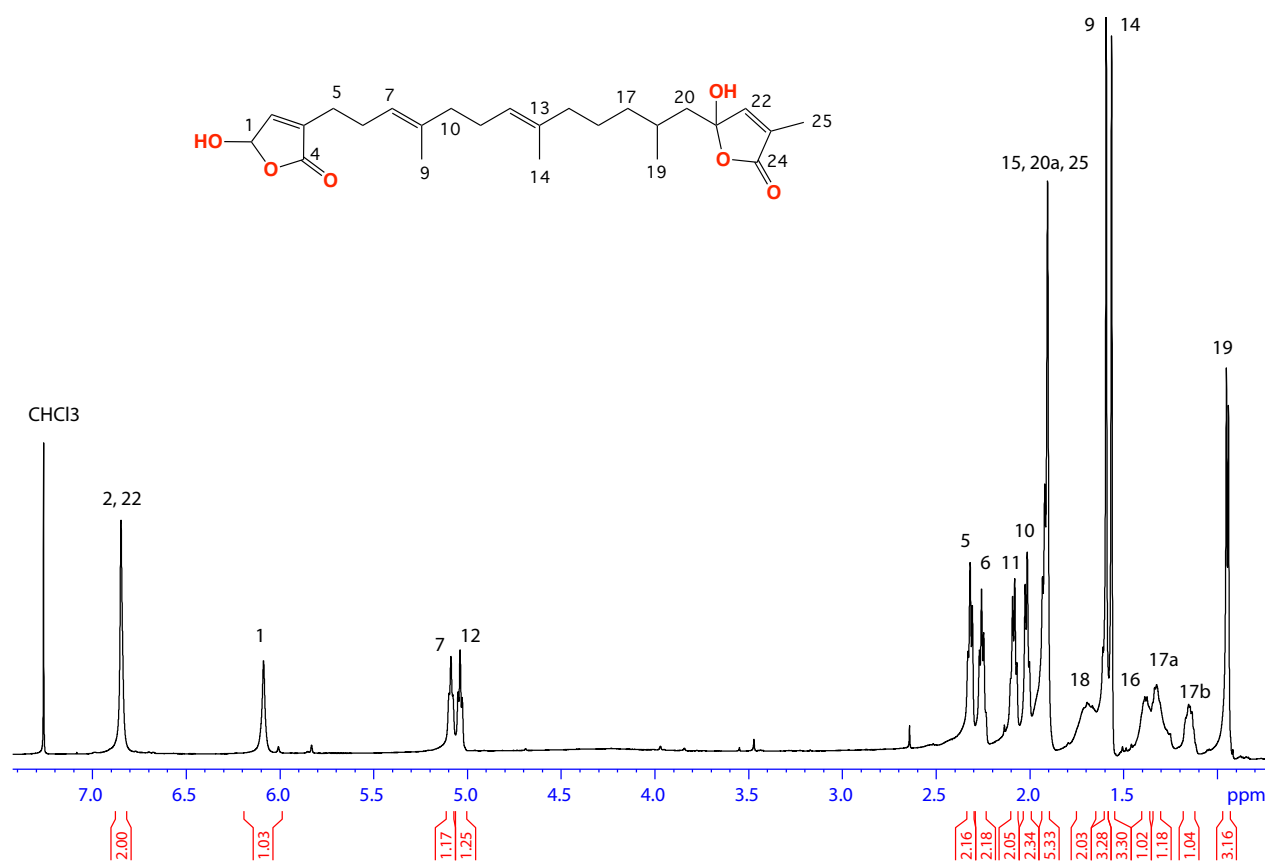

**Figure S11.**  $^1\text{H}$  NMR (600 MHz,  $\text{CDCl}_3$ ) spectrum of cacolide C (**3**)

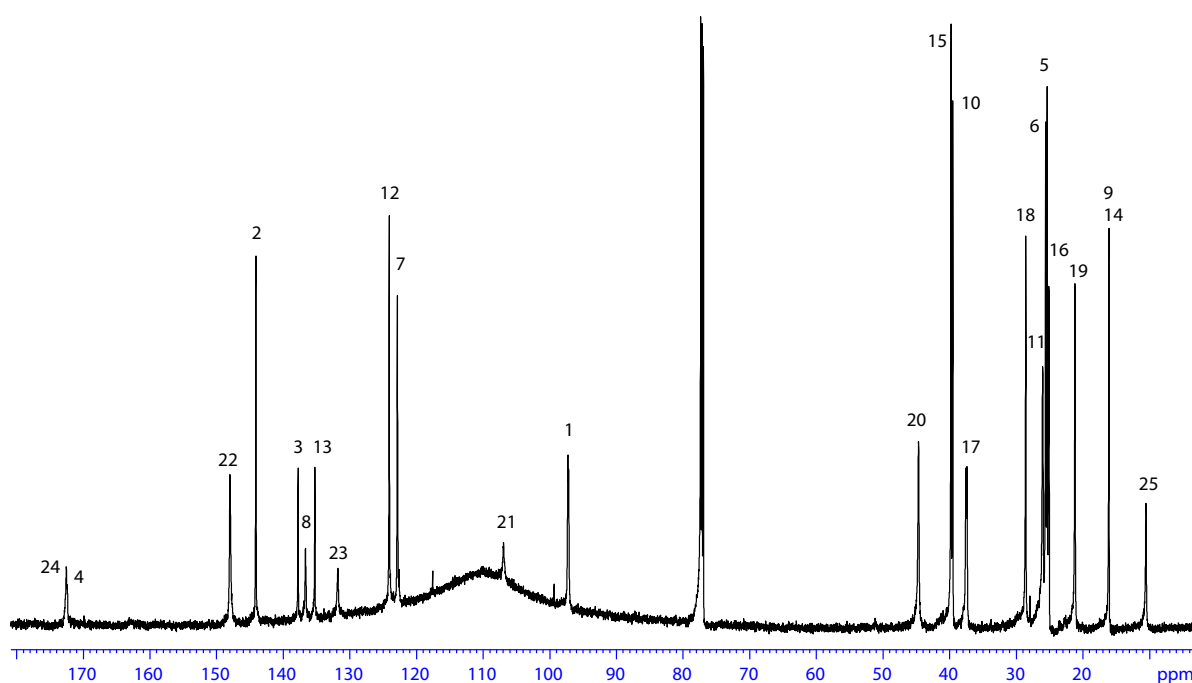

**Figure S12.**  $^{13}\text{C}$  NMR (150 MHz,  $\text{CDCl}_3$ ) spectrum of cacolide C (**3**)

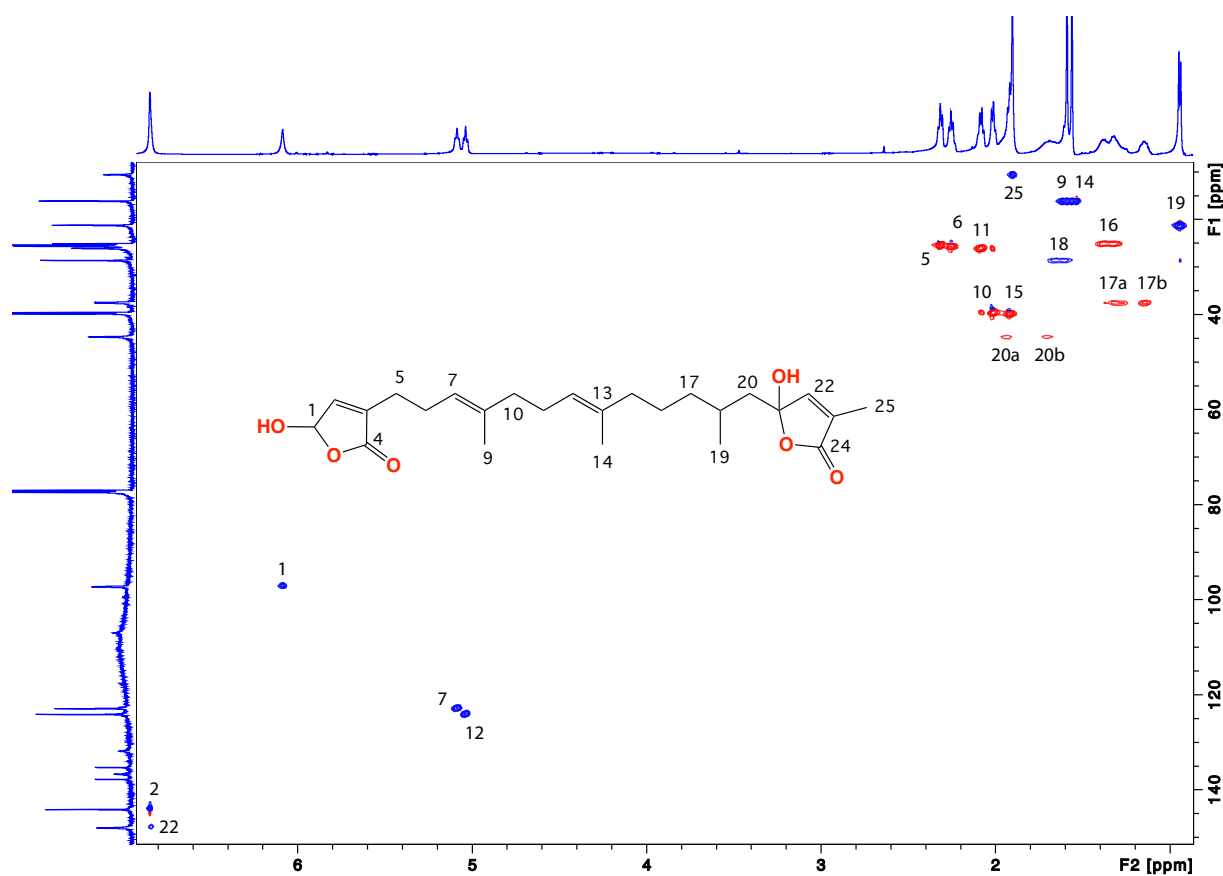

**Figure S13.** HSQC NMR (600 MHz, CDCl<sub>3</sub>) spectrum of cacolide C (3)

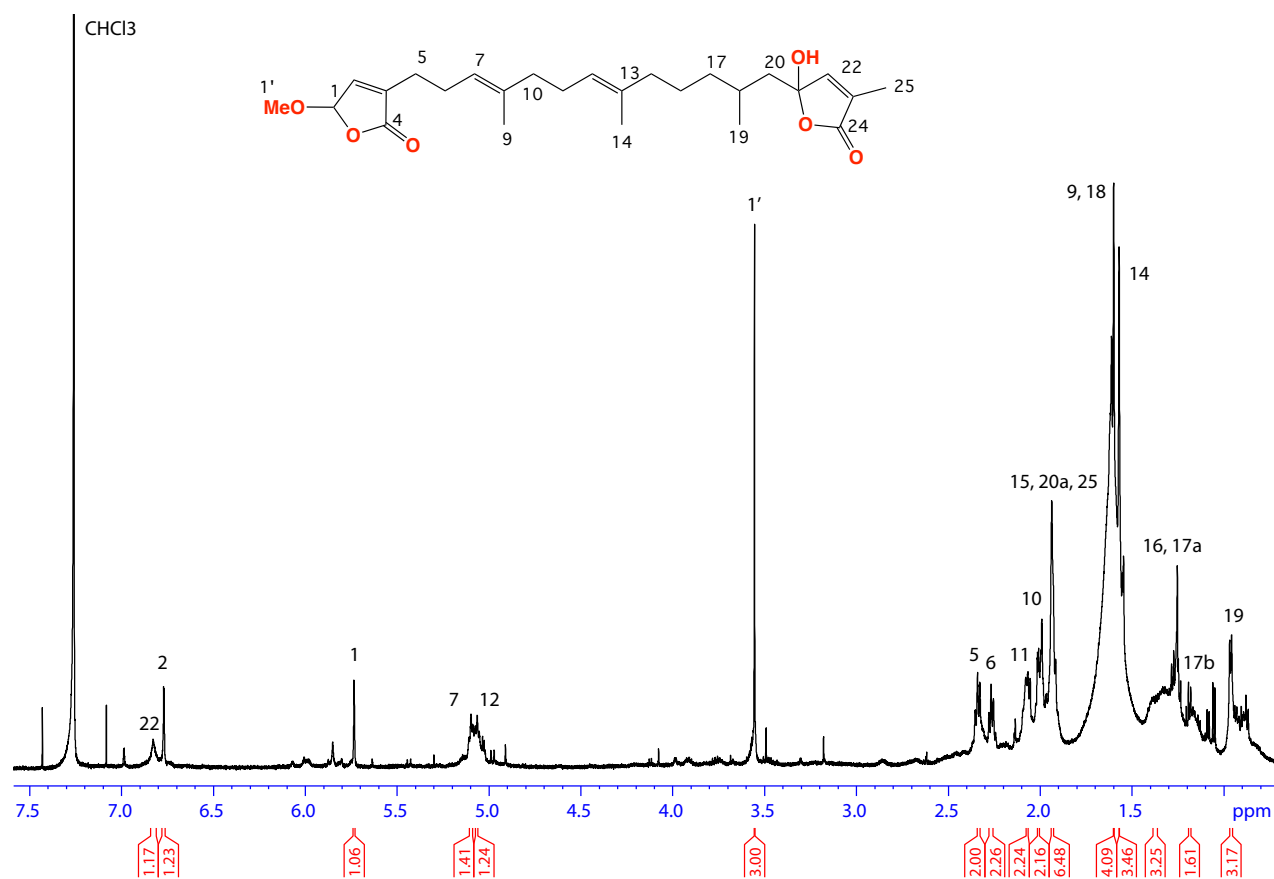

**Figure S14.** <sup>1</sup>H NMR (600 MHz, CDCl<sub>3</sub>) spectrum of cacolide D (4)

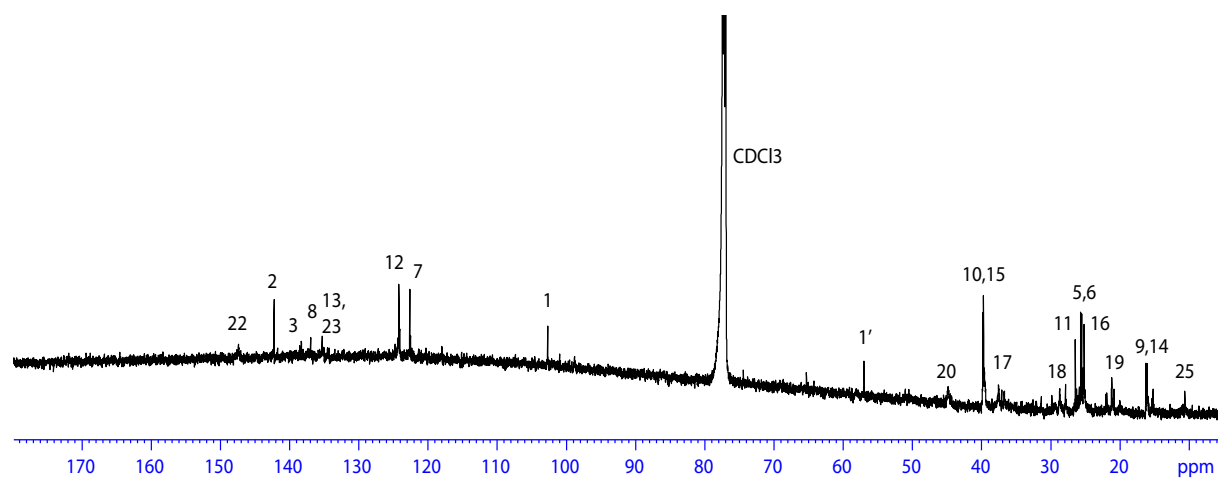

**Figure S15.** <sup>13</sup>C NMR (150 MHz, CDCl<sub>3</sub>) spectrum of cacolide D (4)

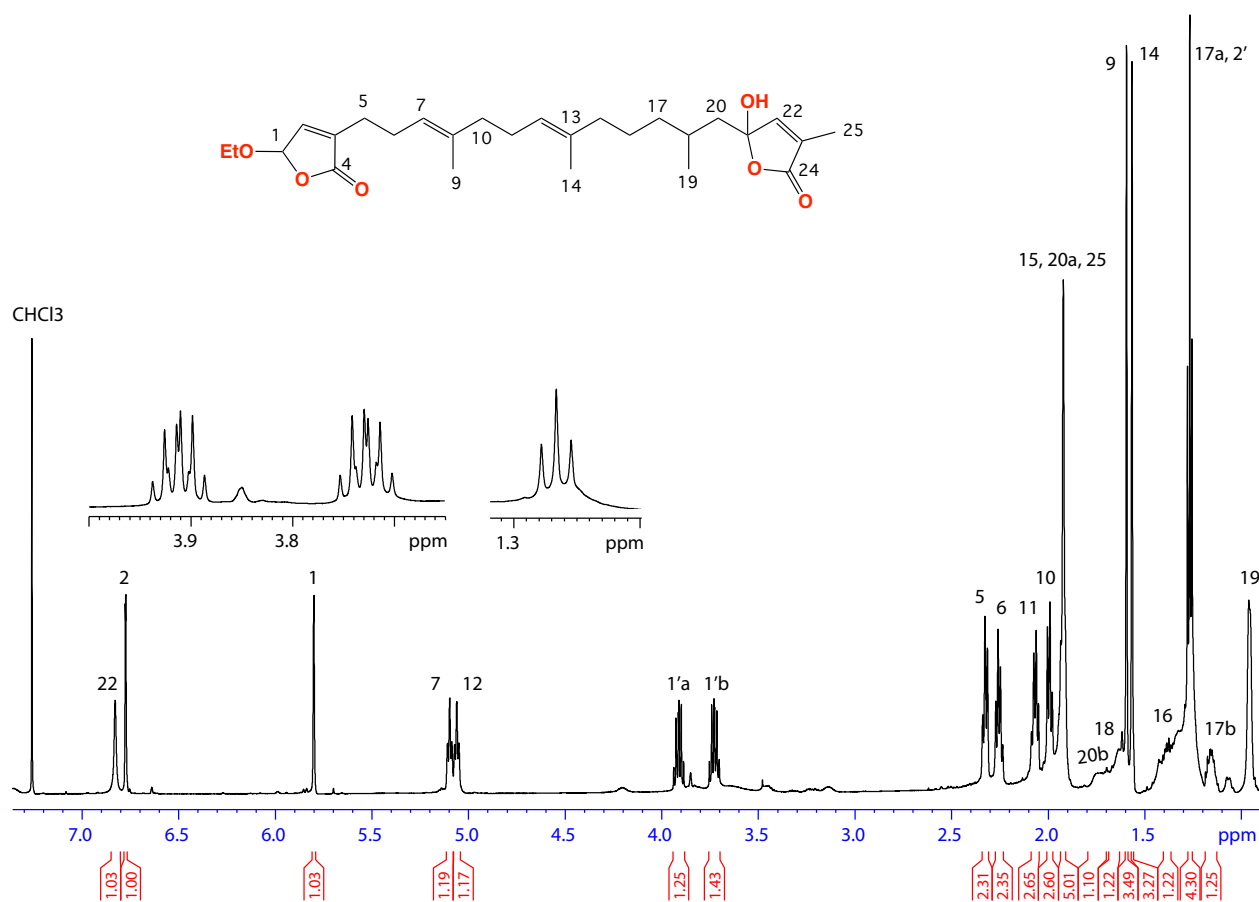

Figure S16.  $^1\text{H}$  NMR (600 MHz,  $\text{CDCl}_3$ ) spectrum of cacolide E (5)

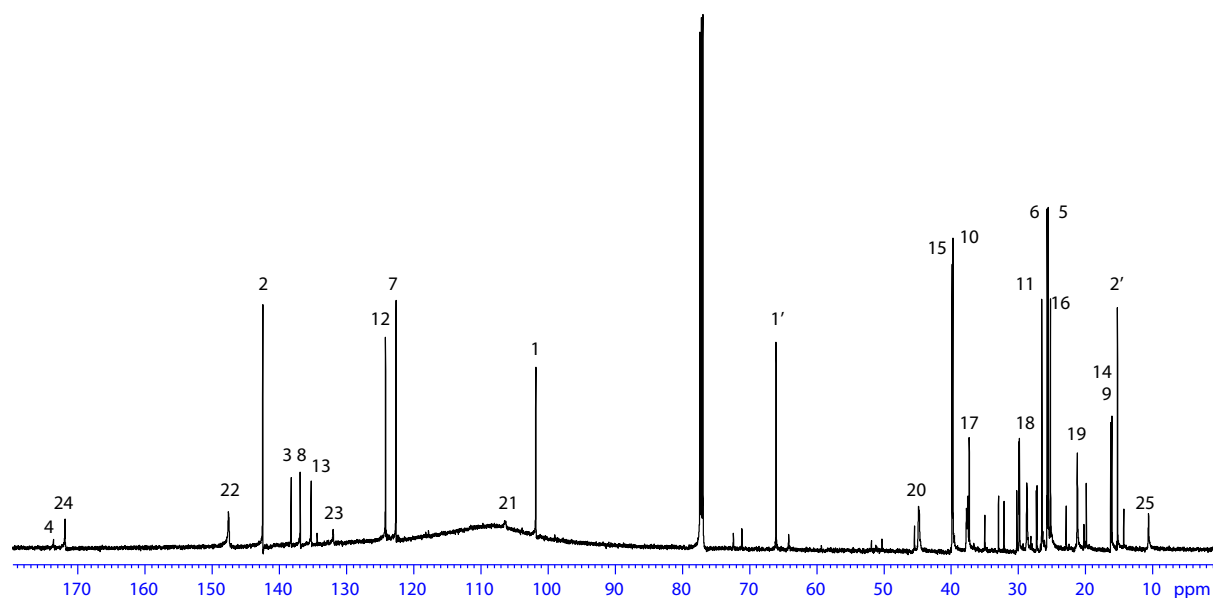

Figure S17.  $^{13}\text{C}$  NMR (150 MHz,  $\text{CDCl}_3$ ) spectrum of cacolide E (5)

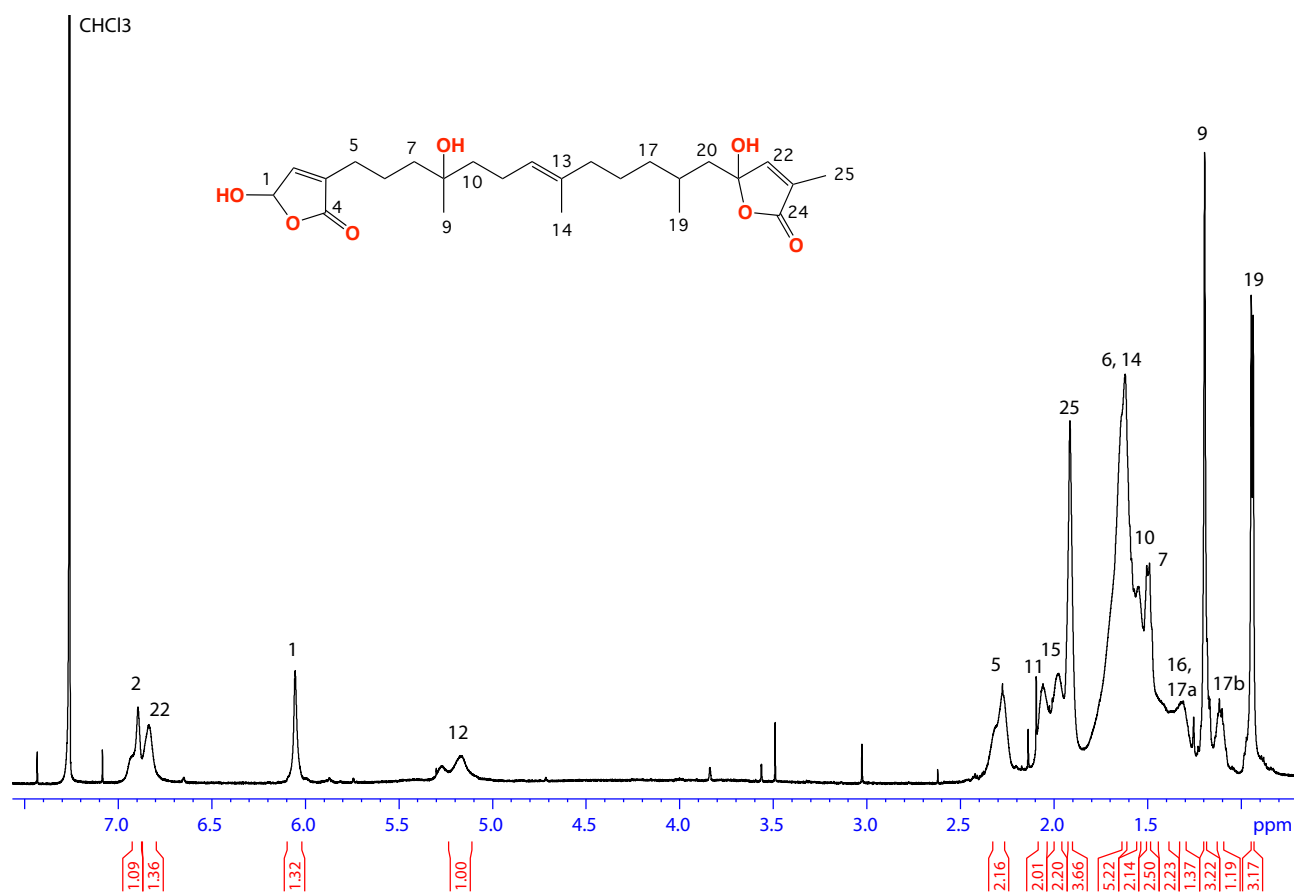

**Figure S18.** <sup>1</sup>H NMR (600 MHz, CDCl<sub>3</sub>) spectrum of cacolide F (**6**)

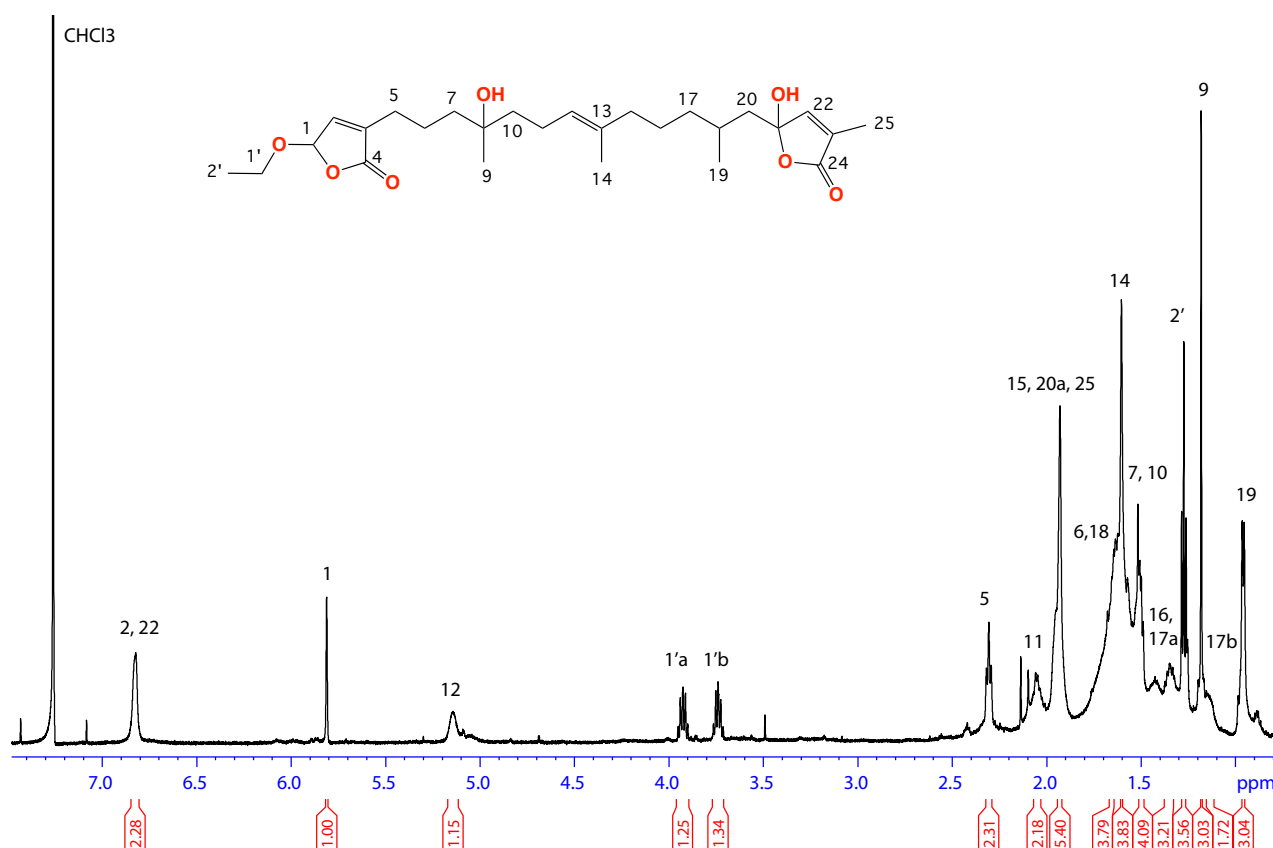

**Figure S19.** <sup>1</sup>H NMR (600 MHz, CDCl<sub>3</sub>) spectrum of cacolide G (7)

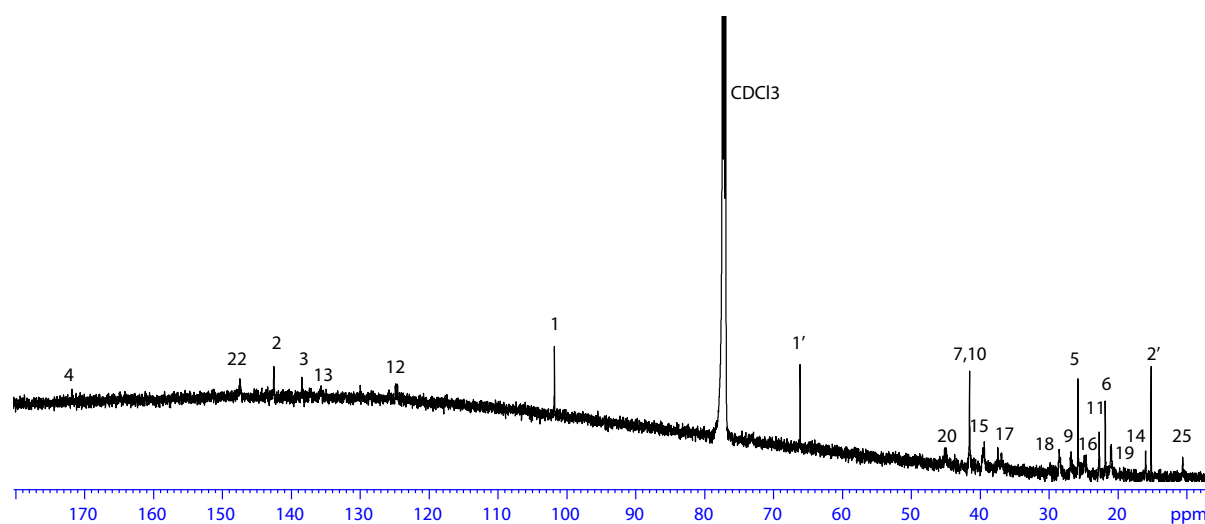

**Figure S20.** <sup>13</sup>C NMR (150 MHz, CDCl<sub>3</sub>) spectrum of cacolide G (7)

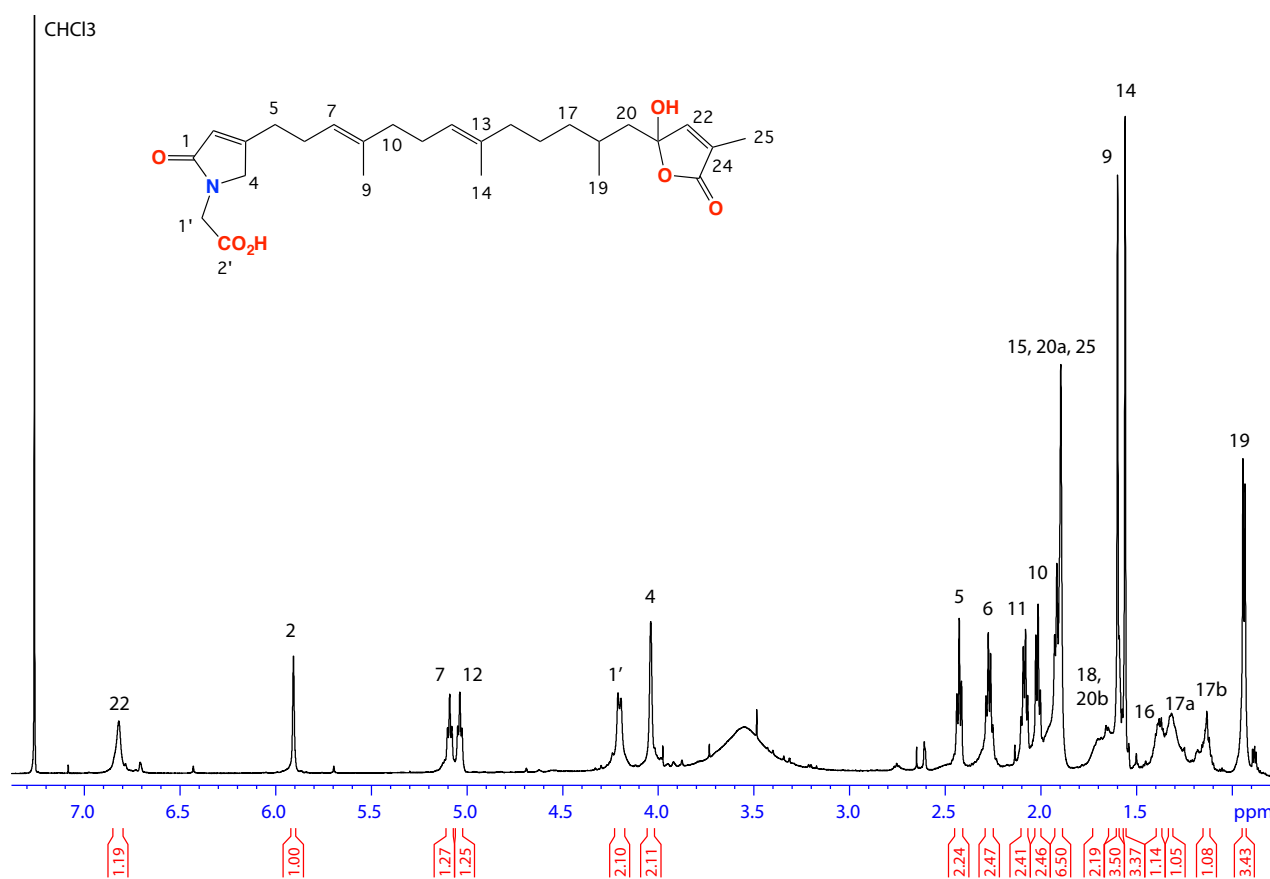

Figure S21. <sup>1</sup>H NMR (600 MHz, CDCl<sub>3</sub>) spectrum of cacolide H (8)

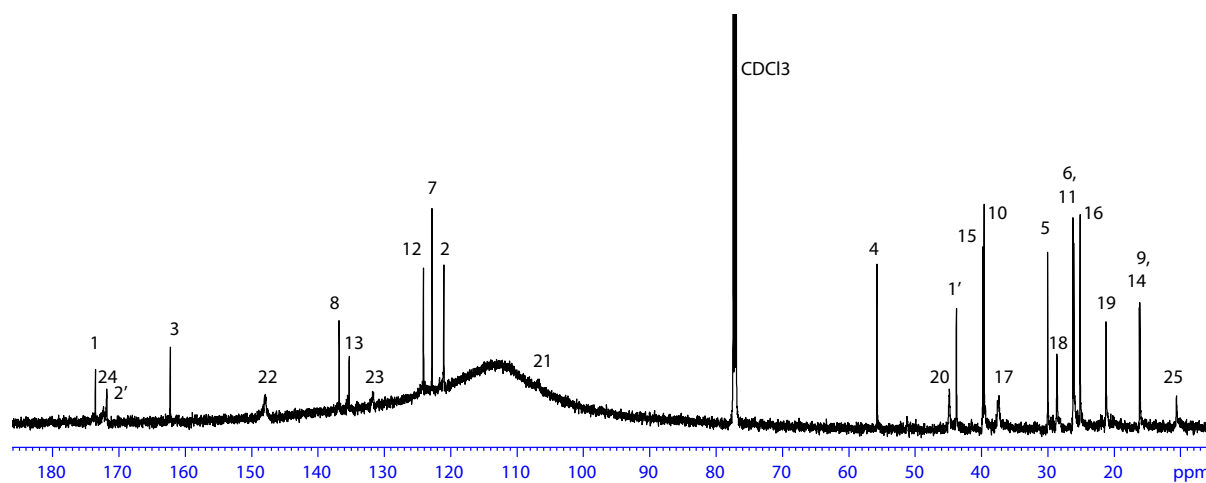

Figure S22. <sup>13</sup>C NMR (150 MHz, CDCl<sub>3</sub>) spectrum of cacolide H (8)



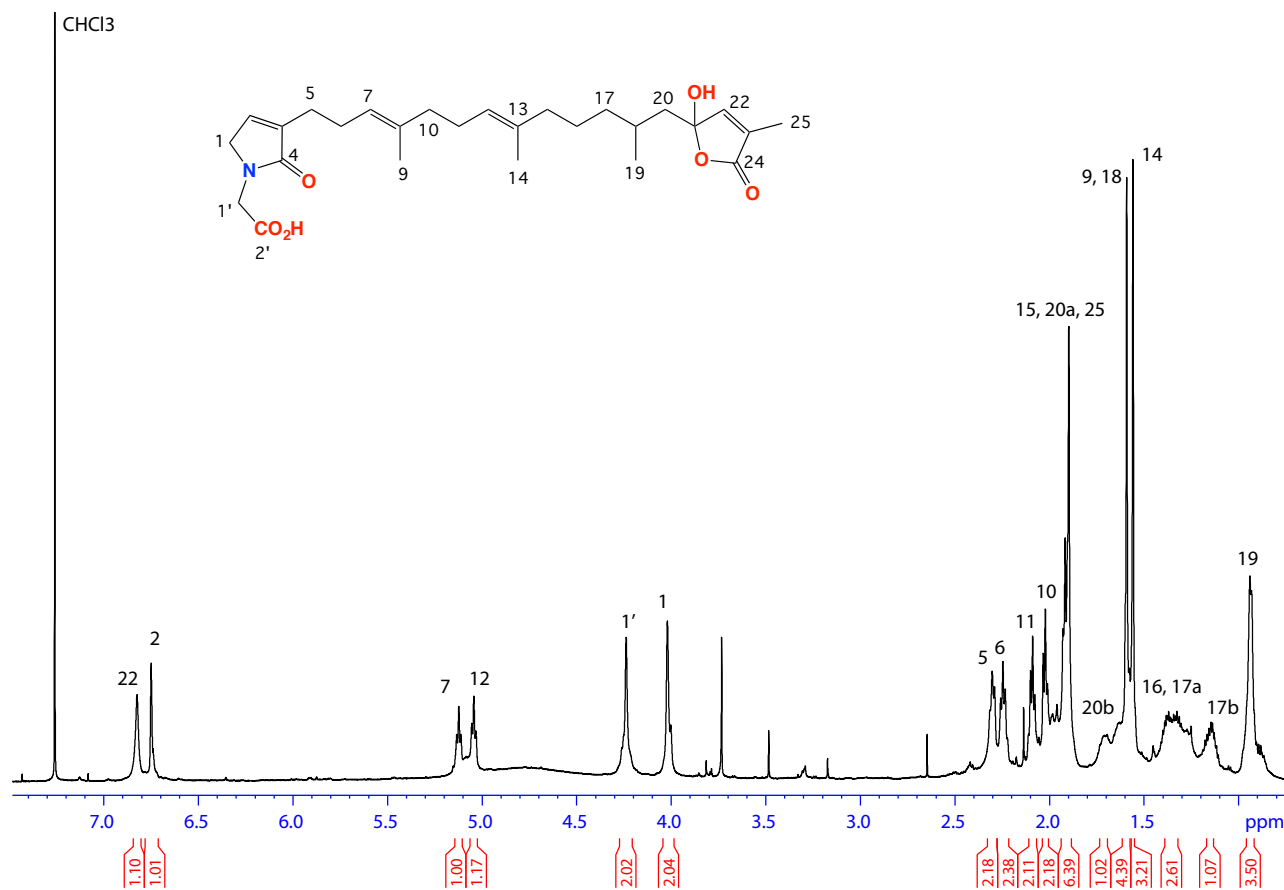

**Figure S23.** <sup>1</sup>H NMR (600 MHz, CDCl<sub>3</sub>) spectrum of cacolide I (9)

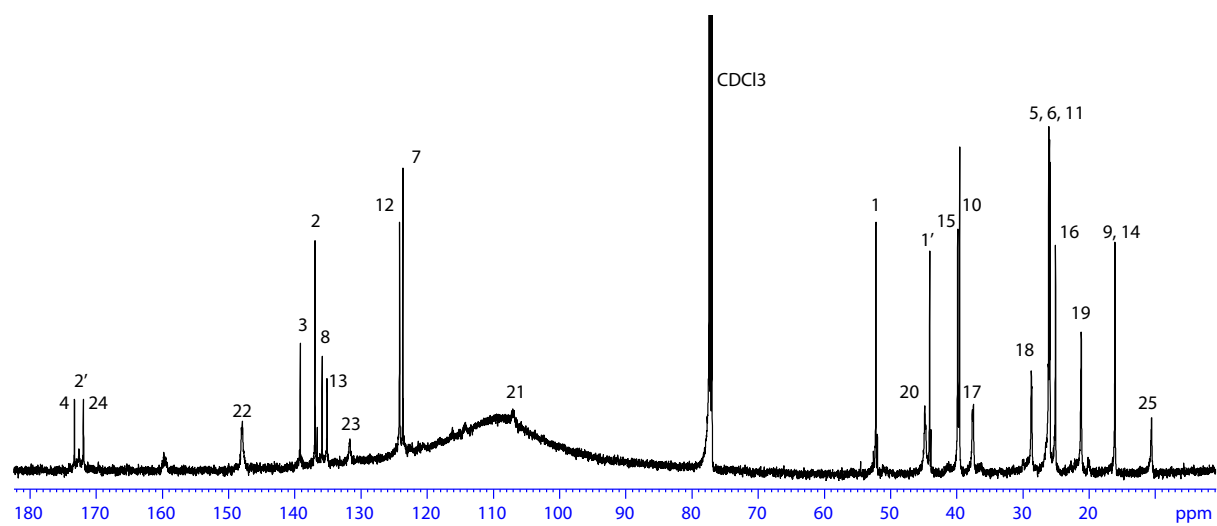

**Figure S24.** <sup>13</sup>C NMR (150 MHz, CDCl<sub>3</sub>) spectrum of cacolide I (9)

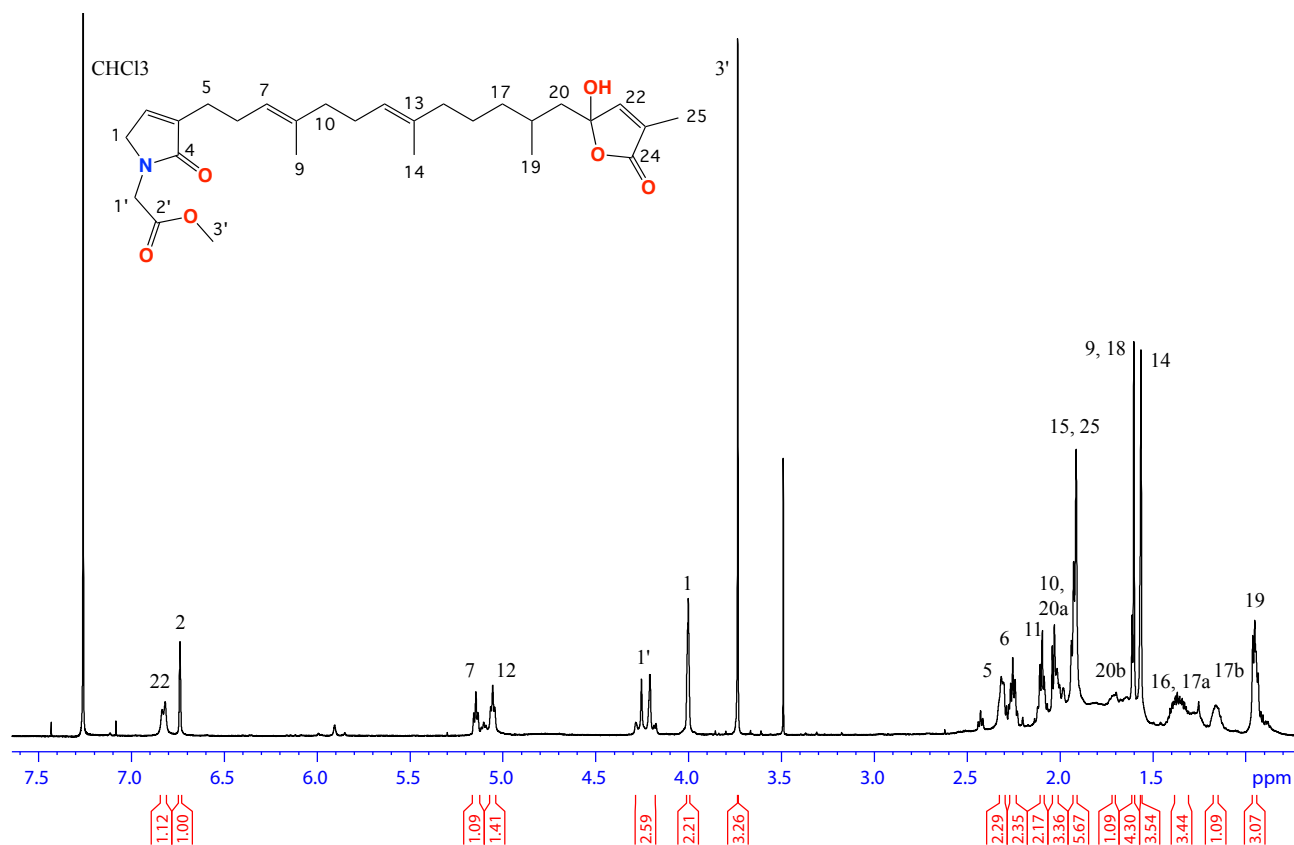

**Figure S25.**  $^1\text{H}$  NMR (600 MHz,  $\text{CDCl}_3$ ) spectrum of cacolide J (10)

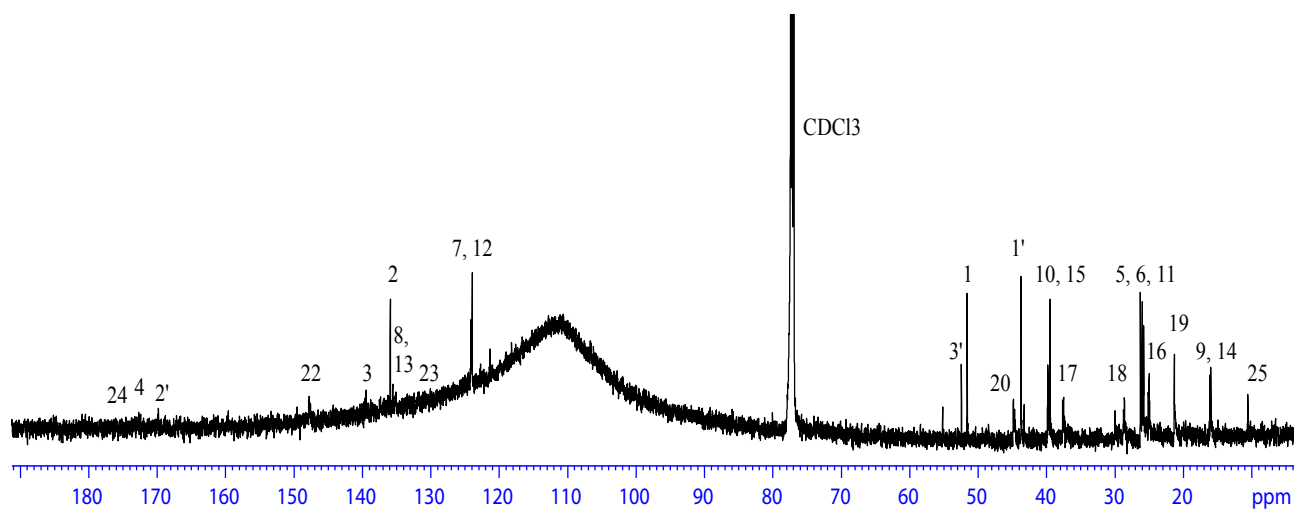

**Figure S26.**  $^{13}\text{C}$  NMR (150 MHz,  $\text{CDCl}_3$ ) spectrum of cacolide J (10)

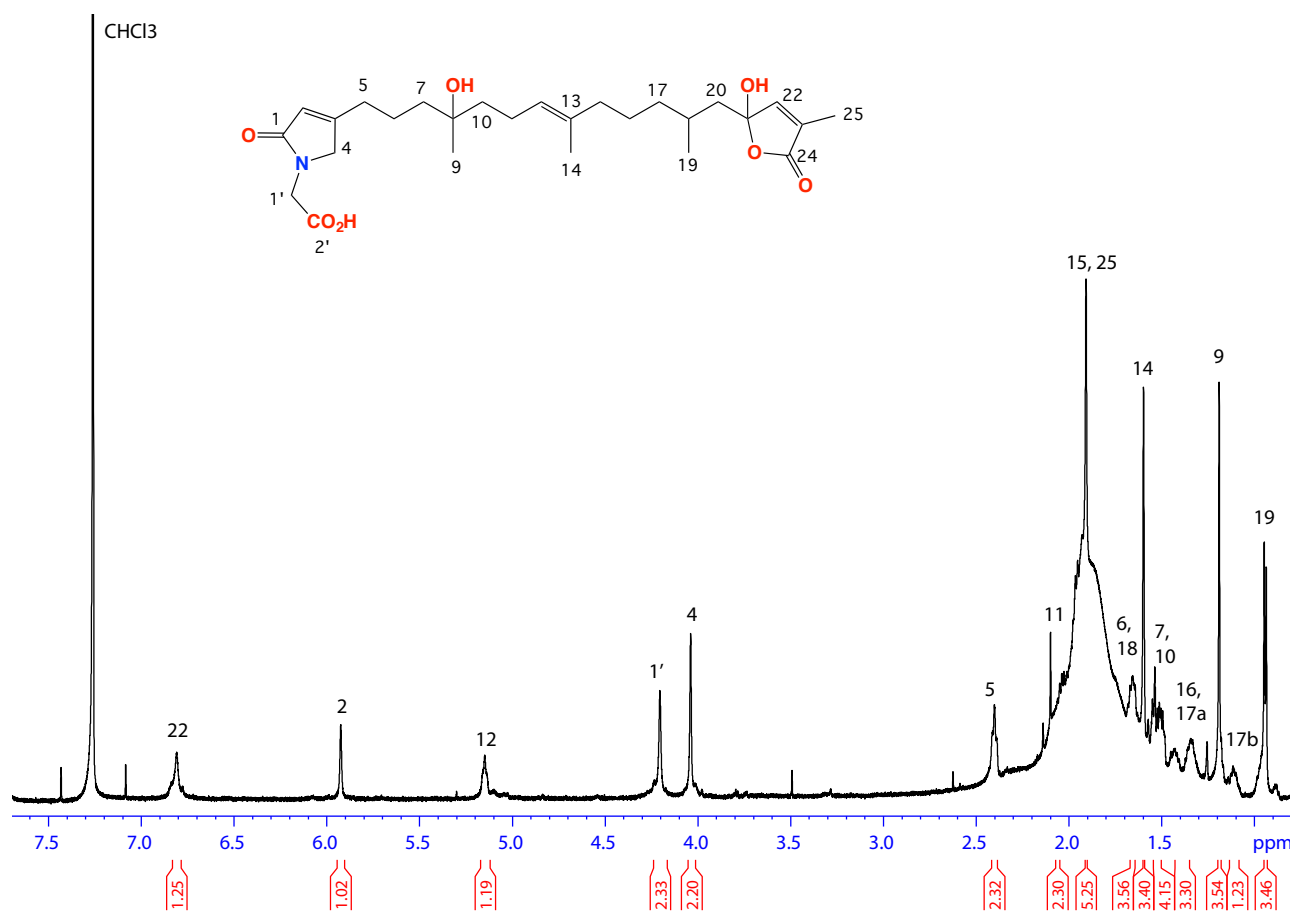

**Figure S27.**  $^1\text{H}$  NMR (600 MHz,  $\text{CDCl}_3$ ) spectrum of cacolide K (11)

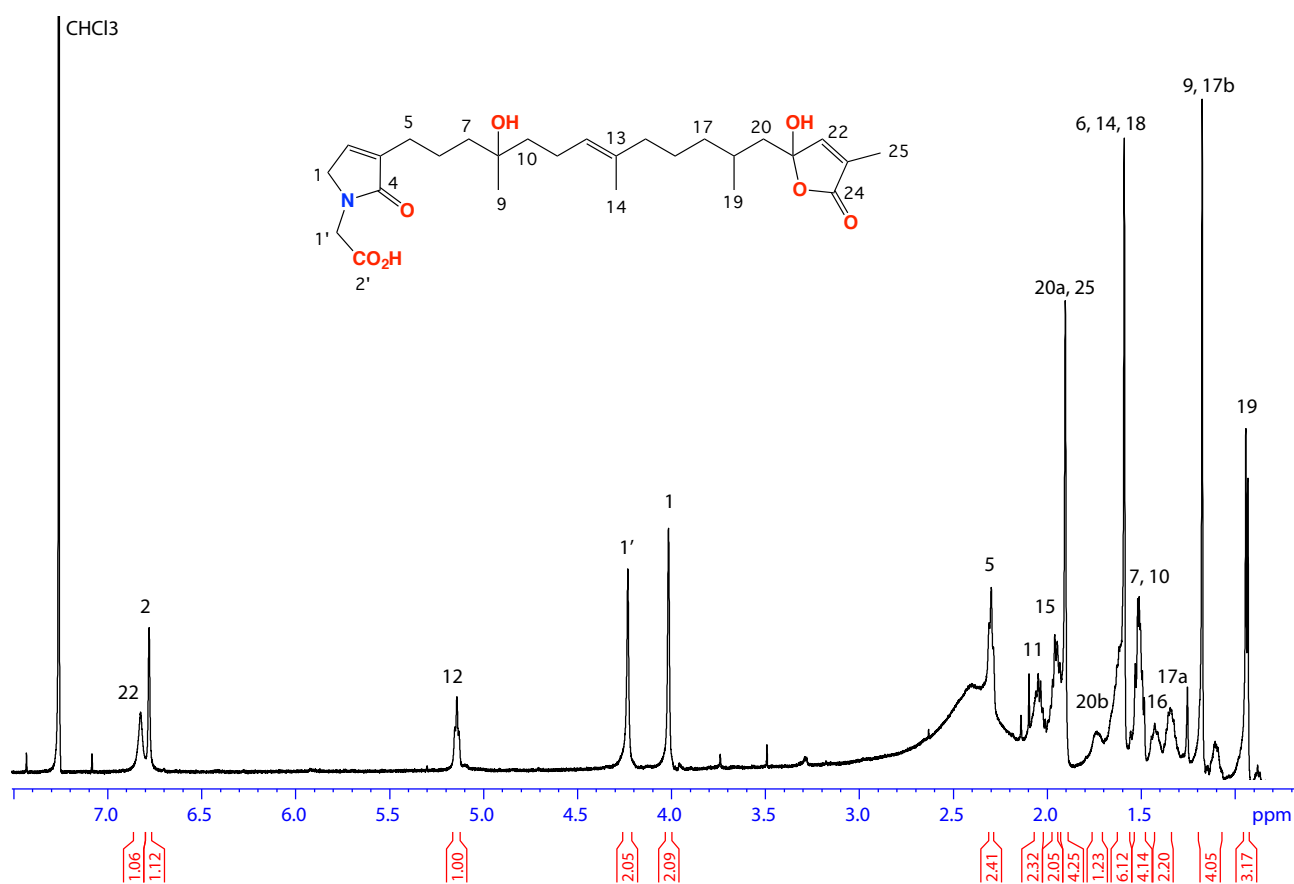

**Figure S28.** <sup>1</sup>H NMR (600 MHz, CDCl<sub>3</sub>) spectrum of cacolide L (12)

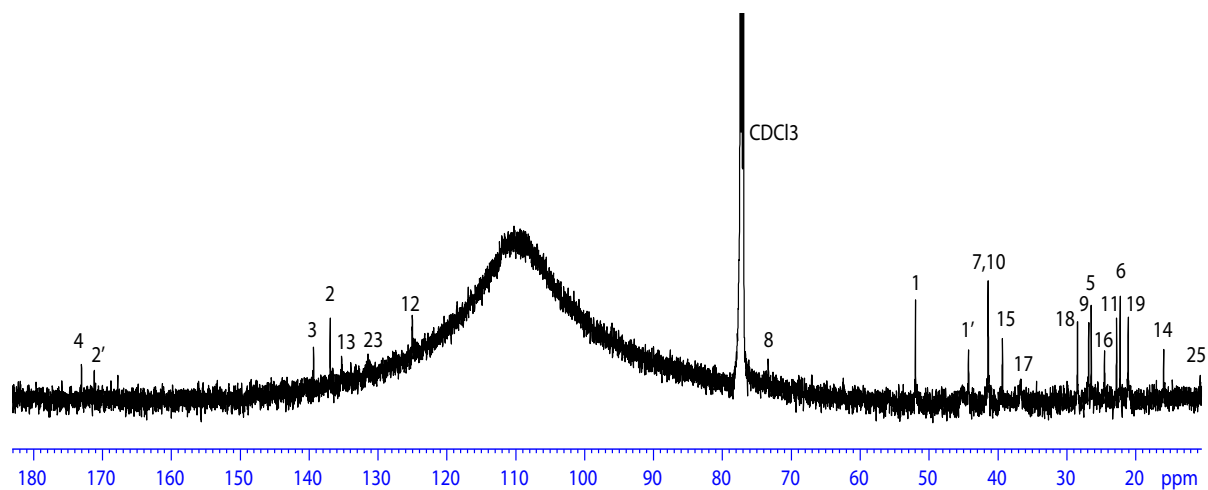

**Figure S29.** <sup>13</sup>C NMR (150 MHz, CDCl<sub>3</sub>) spectrum of cacolide L (12)

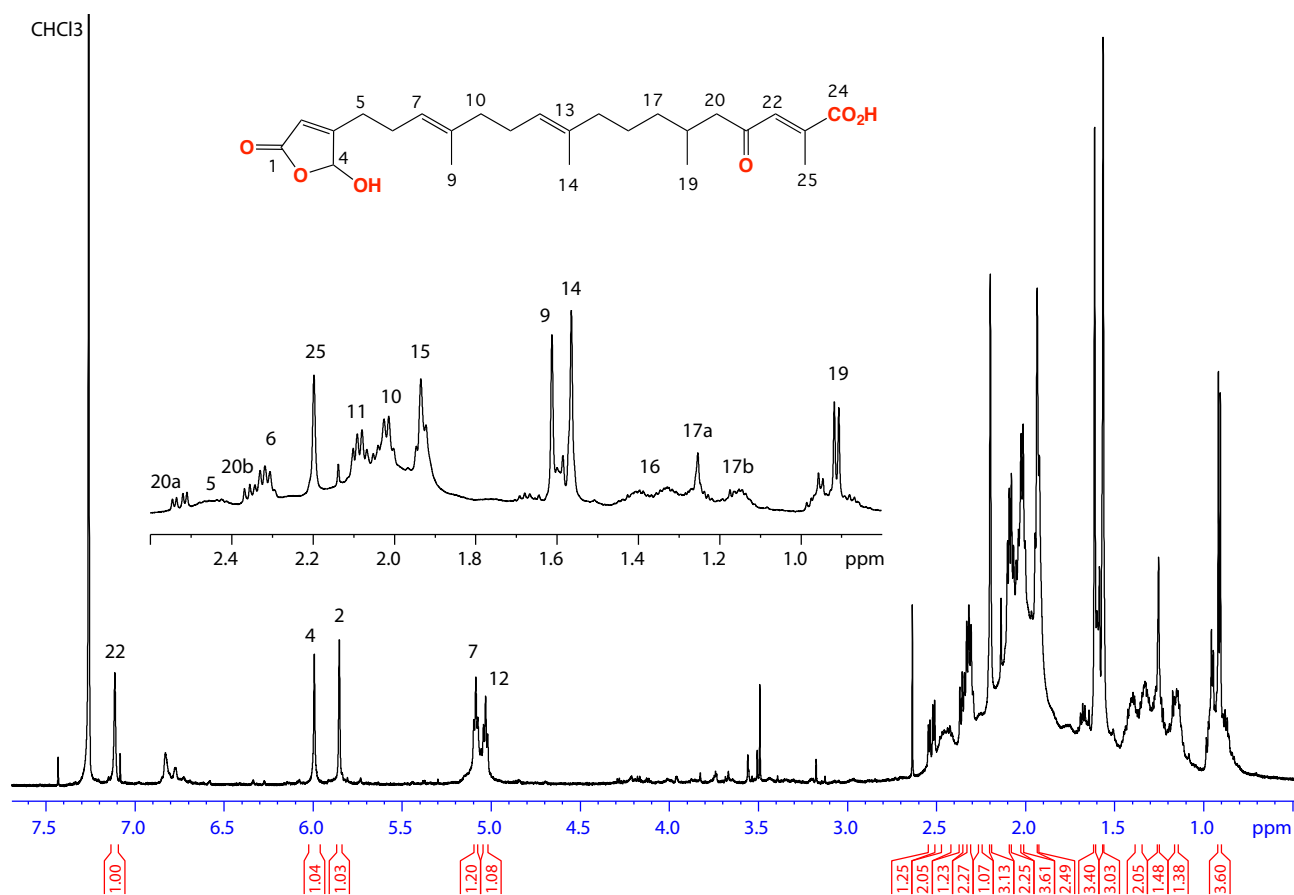

**Figure S30.** <sup>1</sup>H NMR (600 MHz, CDCl<sub>3</sub>) spectrum of cacolic acid A (13)

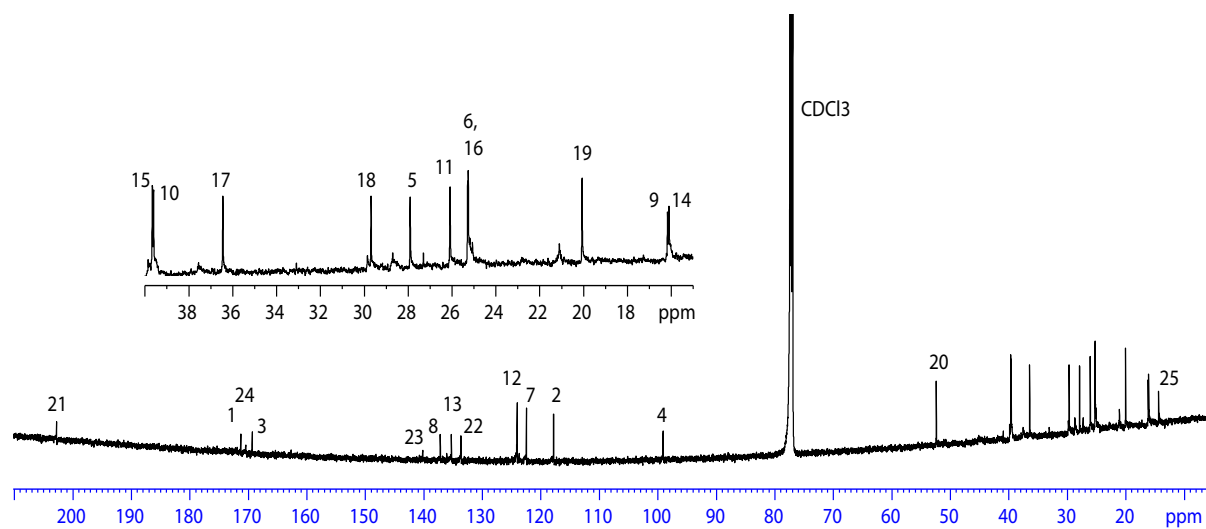

**Figure S31.** <sup>13</sup>C NMR (150 MHz, CDCl<sub>3</sub>) spectrum of cacolic acid A (13)

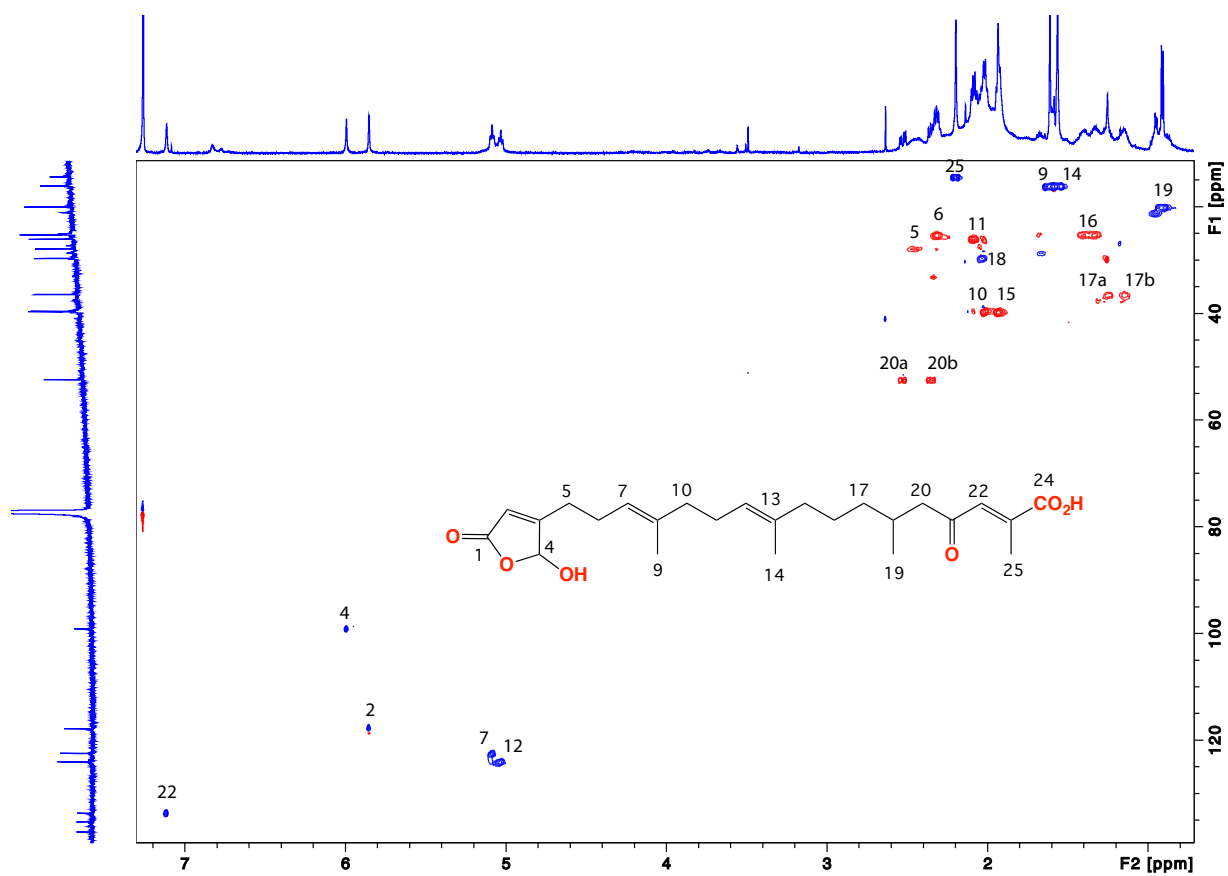

**Figure S32.** HSQC NMR (CDCl<sub>3</sub>) spectrum of cacolic acid A (**13**)

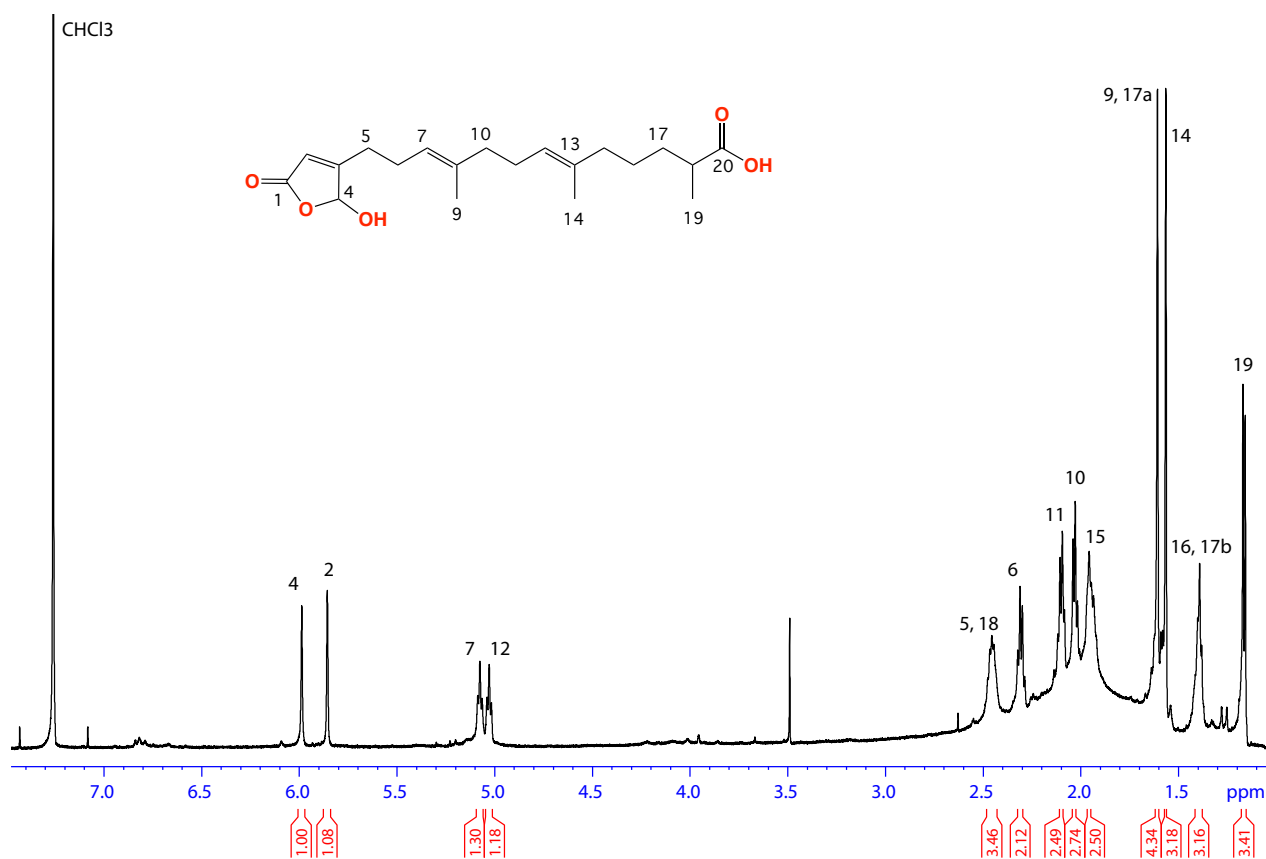

**Figure S33.** <sup>1</sup>H NMR (600 MHz, CDCl<sub>3</sub>) spectrum of cacolic acid B (14)

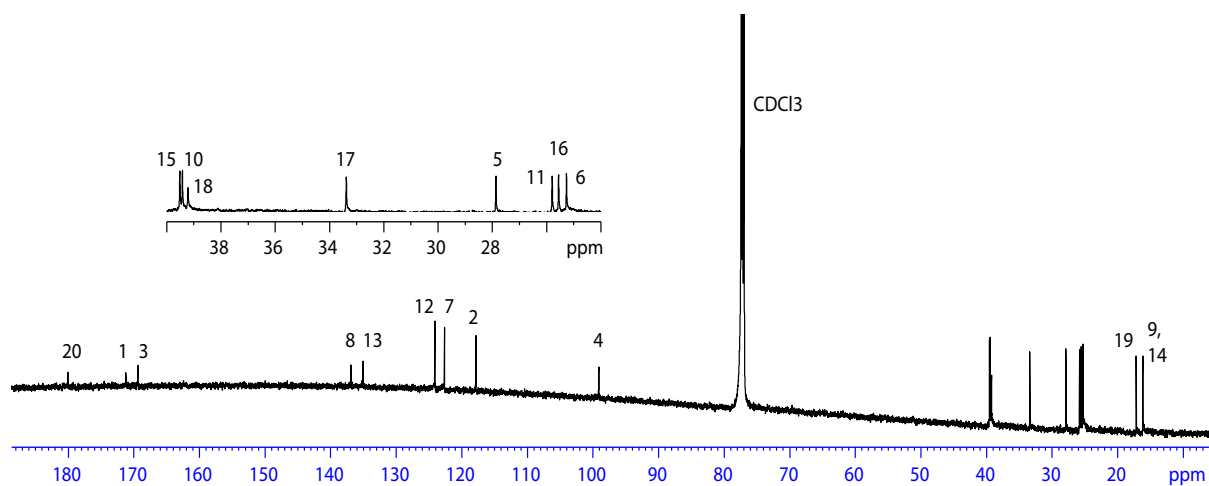

**Figure S34.** <sup>13</sup>C NMR (150 MHz, CDCl<sub>3</sub>) spectrum of cacolic acid B (14)

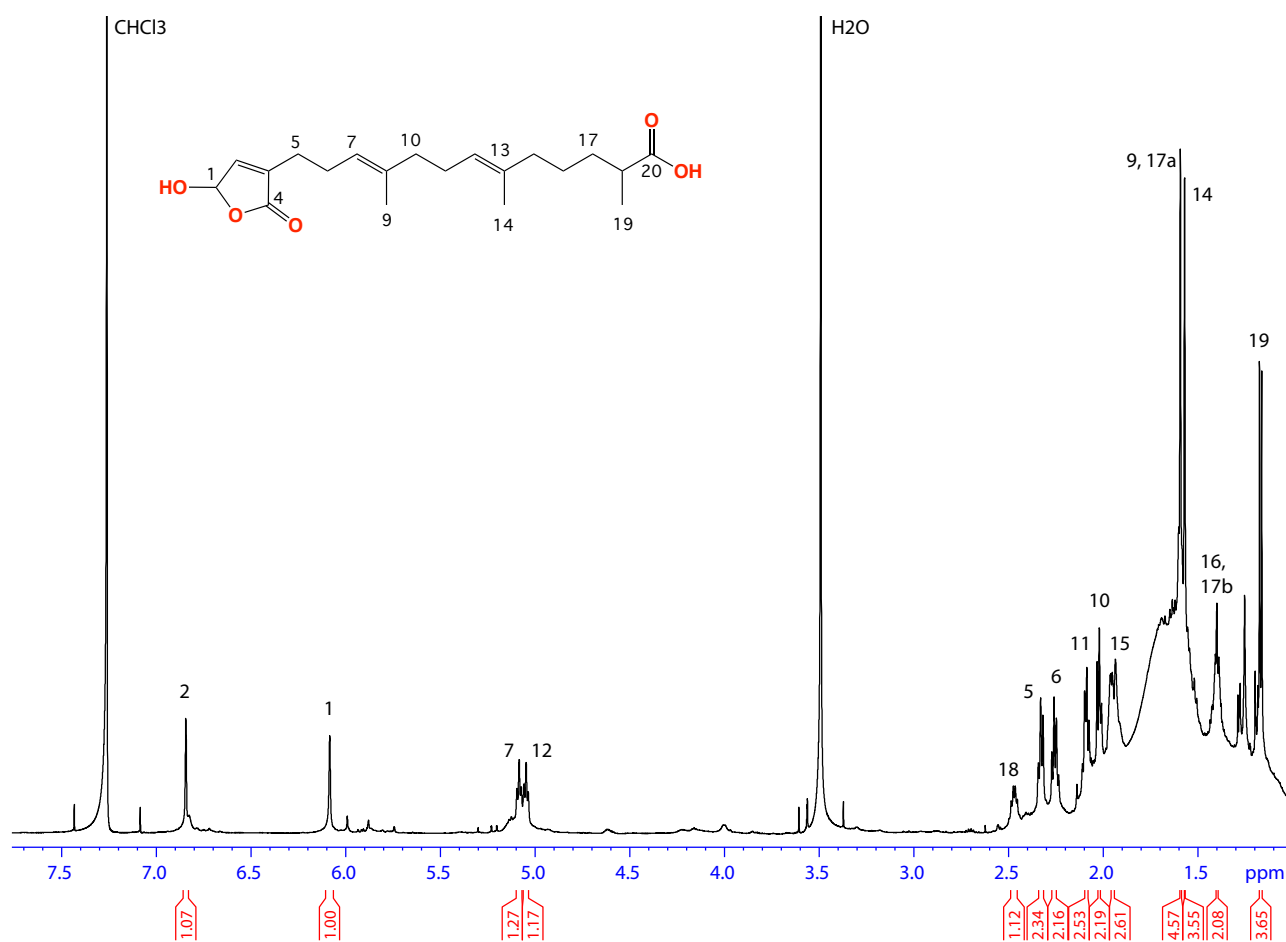

**Figure S35.** <sup>1</sup>H NMR (600 MHz, CDCl<sub>3</sub>) spectrum of cacolic acid C (15)

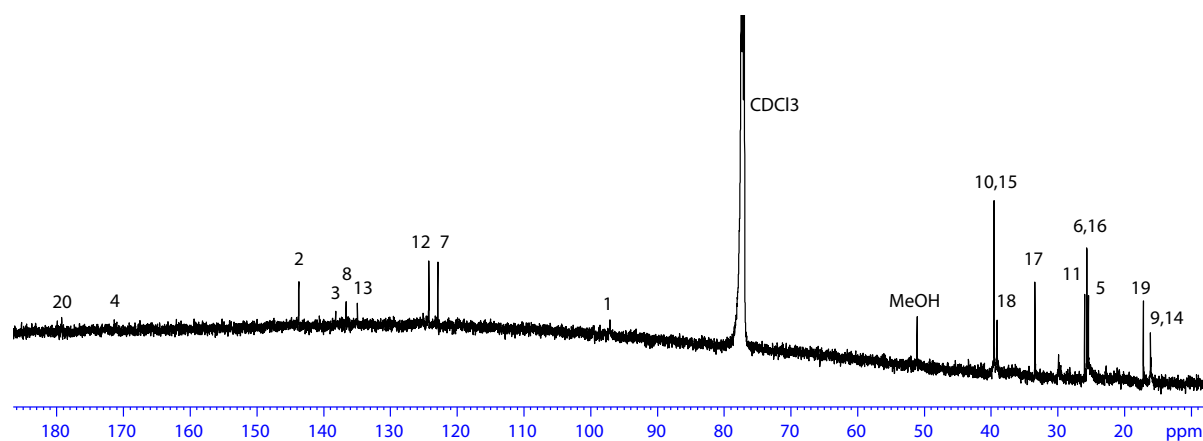

**Figure S36.** <sup>13</sup>C NMR (150 MHz, CDCl<sub>3</sub>) spectrum of cacolic acid C (15)



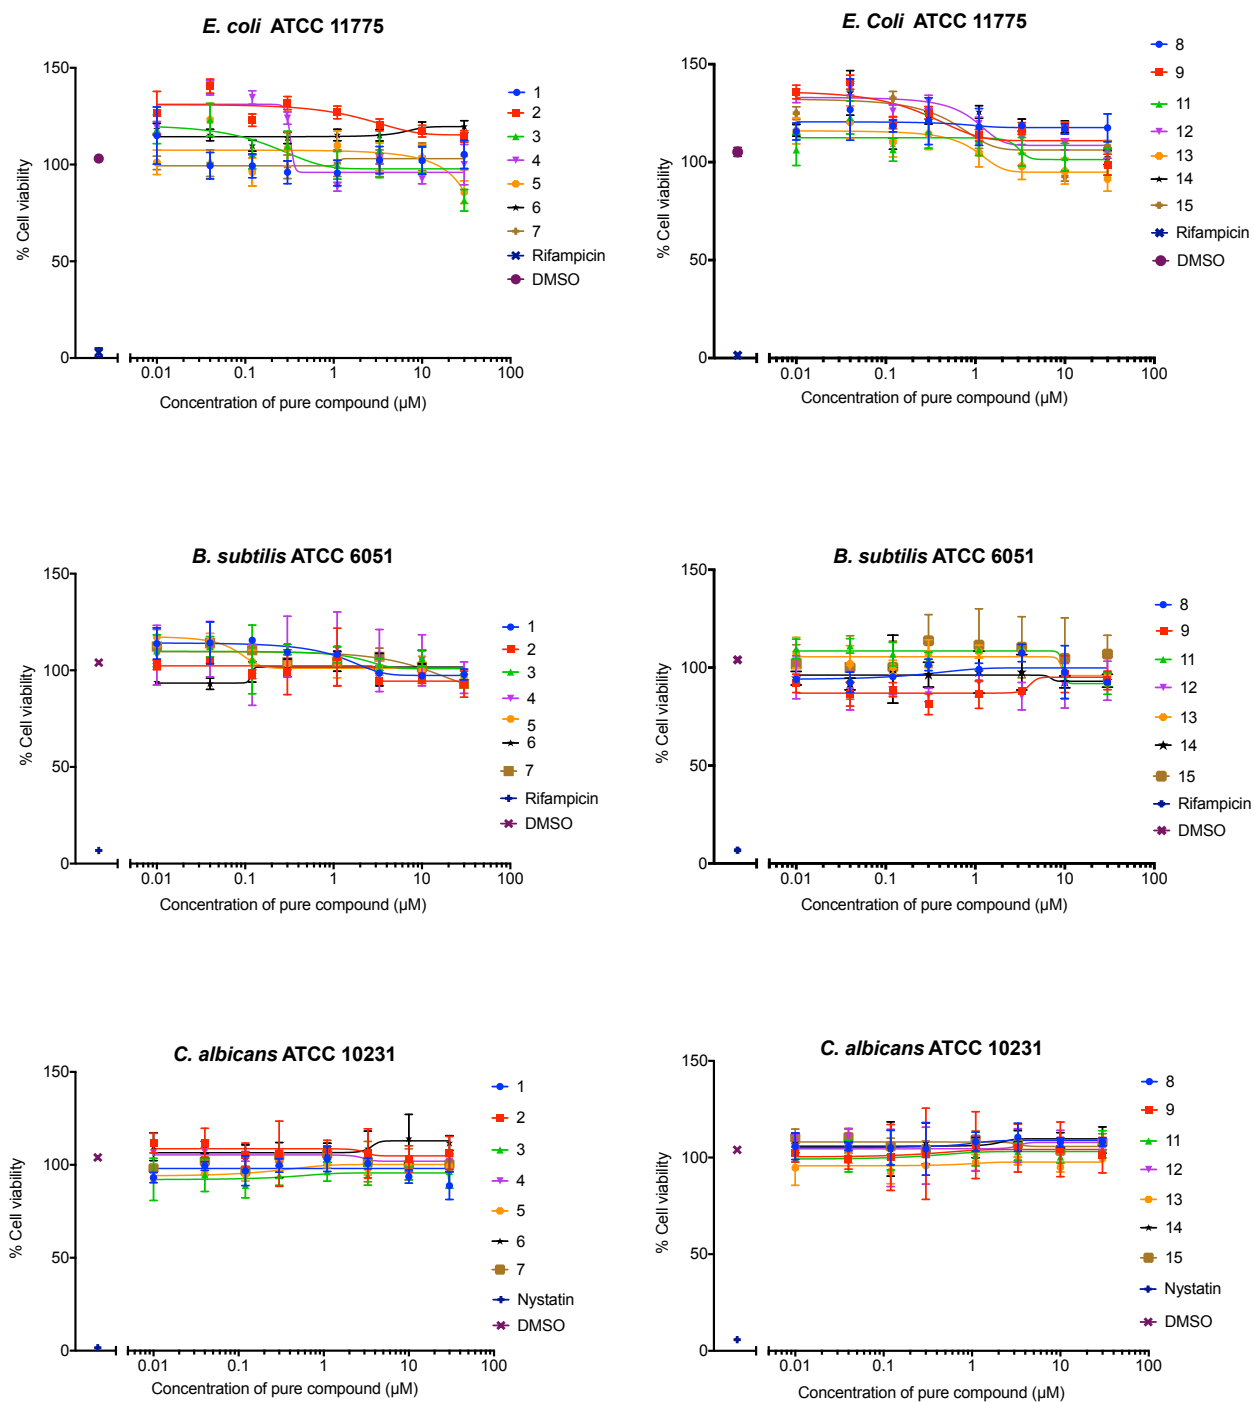

**Figure S37.** Antimicrobial activity of cacolides A-I (1-9), K-L (11-12) and cacolic acids A-C (13-15)

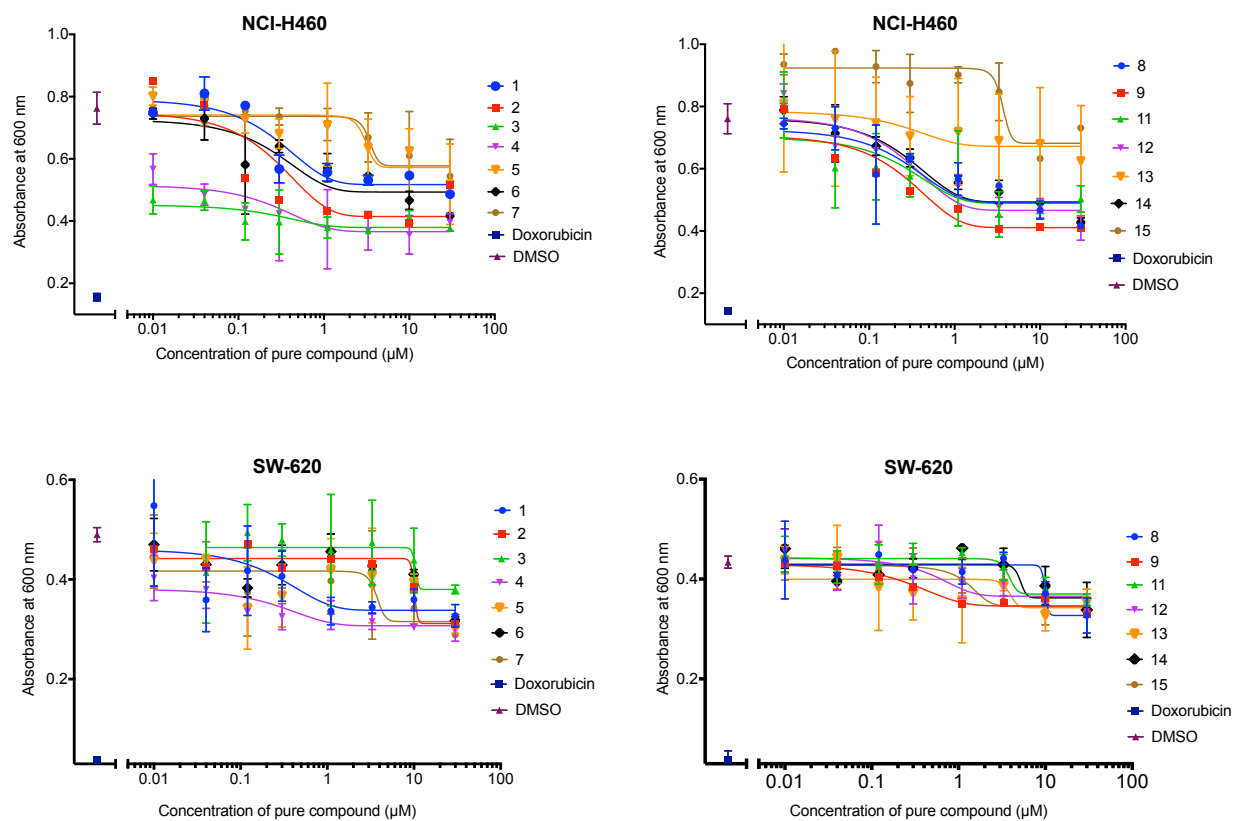

**Figure S38.** Cytotoxic activity of cacolides A-I (1-9), K-L (11-12) and cacolic acids A-C (13-15) against human colorectal (SW620) and lung (NCI-H460) carcinoma cells

## Mass Spectrum SmartFormula Report

### Analysis Info

Analysis Name D:\Data\s.khushi\CMB-03404-1-2-10-2.d  
 Method tune-med\_AP.m  
 Sample Name  
 Comment

Acquisition Date 4/18/2018 12:37:50 PM

Operator a.piggott  
 Instrument micrOTOF 213750.00232

### Acquisition Parameter

|             |            |                      |          |                  |           |
|-------------|------------|----------------------|----------|------------------|-----------|
| Source Type | ESI        | Ion Polarity         | Positive | Set Nebulizer    | 0.8 Bar   |
| Focus       | Not active |                      |          | Set Dry Heater   | 180 °C    |
| Scan Begin  | 100 m/z    | Set Capillary        | 4500 V   | Set Dry Gas      | 5.0 l/min |
| Scan End    | 1000 m/z   | Set End Plate Offset | -500 V   | Set Divert Valve | Source    |

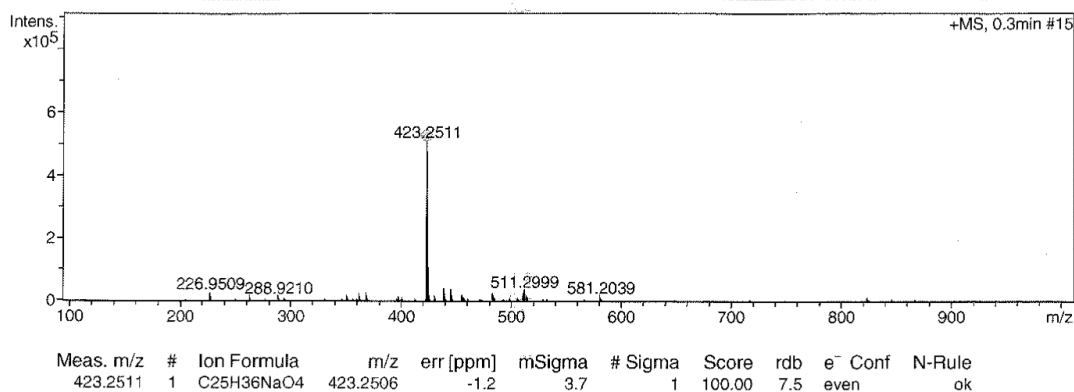

**Figure S39.** HR-ESIMS data for cacolide A (1)

## Mass Spectrum SmartFormula Report

### Analysis Info

Analysis Name D:\Data\s.khushi\CMB-03404-1-2-6-5.d  
 Method tune-med\_AP.m  
 Sample Name  
 Comment

Acquisition Date 4/18/2018 12:09:59 PM

Operator a.piggott  
 Instrument micrOTOF 213750.00232

### Acquisition Parameter

|             |            |                      |          |                  |           |
|-------------|------------|----------------------|----------|------------------|-----------|
| Source Type | ESI        | Ion Polarity         | Positive | Set Nebulizer    | 0.8 Bar   |
| Focus       | Not active |                      |          | Set Dry Heater   | 180 °C    |
| Scan Begin  | 100 m/z    | Set Capillary        | 4500 V   | Set Dry Gas      | 5.0 l/min |
| Scan End    | 1000 m/z   | Set End Plate Offset | -500 V   | Set Divert Valve | Source    |

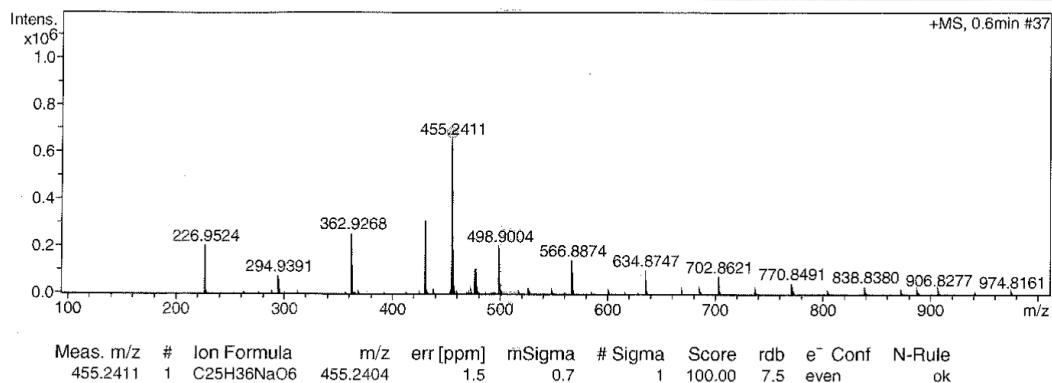

**Figure S40.** HR-ESIMS data for cacolide B (2)

## Mass Spectrum SmartFormula Report

### Analysis Info

Analysis Name D:\Data\s.khushi\CMB-03404-1-2-6-6.d  
 Method tune-med\_AP.m  
 Sample Name  
 Comment

Acquisition Date 4/18/2018 12:19:20 PM

Operator a.piggott  
 Instrument micrOTOF 213750.00232

### Acquisition Parameter

|             |            |                      |          |                  |           |
|-------------|------------|----------------------|----------|------------------|-----------|
| Source Type | ESI        | Ion Polarity         | Positive | Set Nebulizer    | 0.8 Bar   |
| Focus       | Not active |                      |          | Set Dry Heater   | 180 °C    |
| Scan Begin  | 100 m/z    | Set Capillary        | 4500 V   | Set Dry Gas      | 5.0 l/min |
| Scan End    | 1000 m/z   | Set End Plate Offset | -500 V   | Set Divert Valve | Source    |

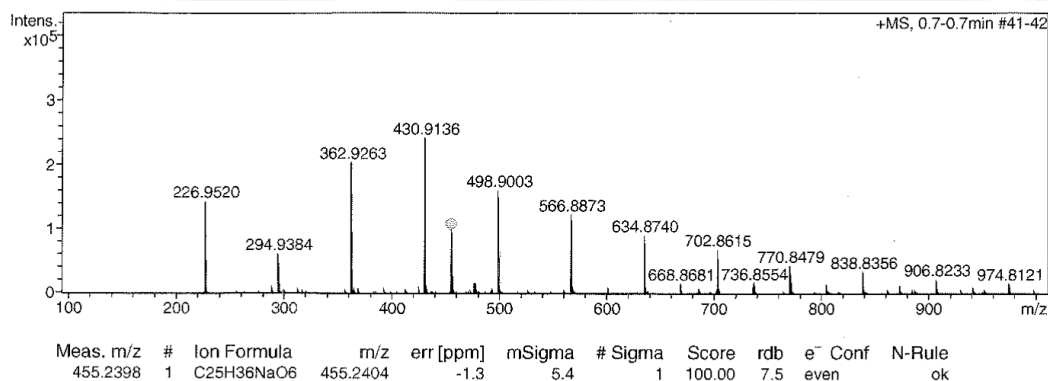

Figure S41. HR-ESIMS data for cacolide C (3)

## Mass Spectrum SmartFormula Report

### Analysis Info

Analysis Name D:\Data\s.khushi\CMB-03404-1-2-8-4.d  
 Method tune-med\_AP.m  
 Sample Name  
 Comment

Acquisition Date 4/18/2018 12:56:36 PM

Operator a.piggott  
 Instrument micrOTOF 213750.00232

### Acquisition Parameter

|             |            |                      |          |                  |           |
|-------------|------------|----------------------|----------|------------------|-----------|
| Source Type | ESI        | Ion Polarity         | Positive | Set Nebulizer    | 0.8 Bar   |
| Focus       | Not active |                      |          | Set Dry Heater   | 180 °C    |
| Scan Begin  | 100 m/z    | Set Capillary        | 4500 V   | Set Dry Gas      | 5.0 l/min |
| Scan End    | 1000 m/z   | Set End Plate Offset | -500 V   | Set Divert Valve | Source    |

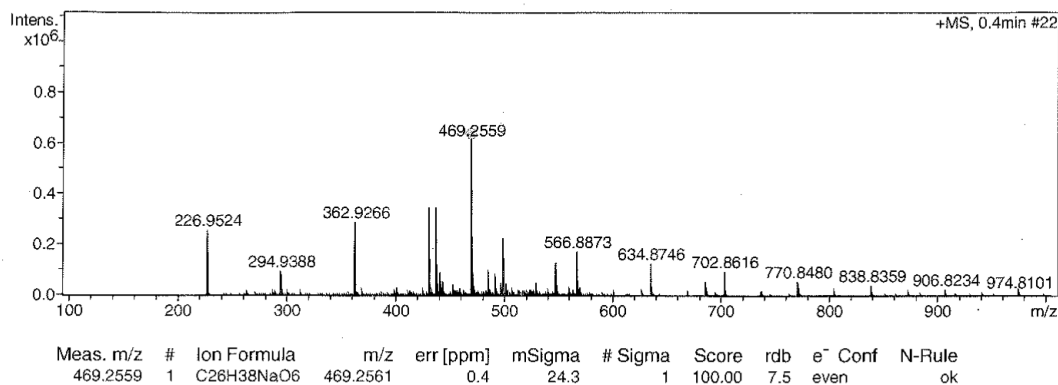

Figure S42. HR-ESIMS data for cacolide D (4)

## Mass Spectrum SmartFormula Report

### Analysis Info

Analysis Name D:\Data\s.khushi\CMB-03404-1-2-8-9.d  
Method tune-med\_AP.m  
Sample Name  
Comment

Acquisition Date 4/18/2018 12:31:40 PM

Operator a.piggott  
Instrument micrOTOF 213750.00232

### Acquisition Parameter

|             |            |                      |          |                  |           |
|-------------|------------|----------------------|----------|------------------|-----------|
| Source Type | ESI        | Ion Polarity         | Positive | Set Nebulizer    | 0.8 Bar   |
| Focus       | Not active |                      |          | Set Dry Heater   | 180 °C    |
| Scan Begin  | 100 m/z    | Set Capillary        | 4500 V   | Set Dry Gas      | 5.0 l/min |
| Scan End    | 1000 m/z   | Set End Plate Offset | -500 V   | Set Divert Valve | Source    |

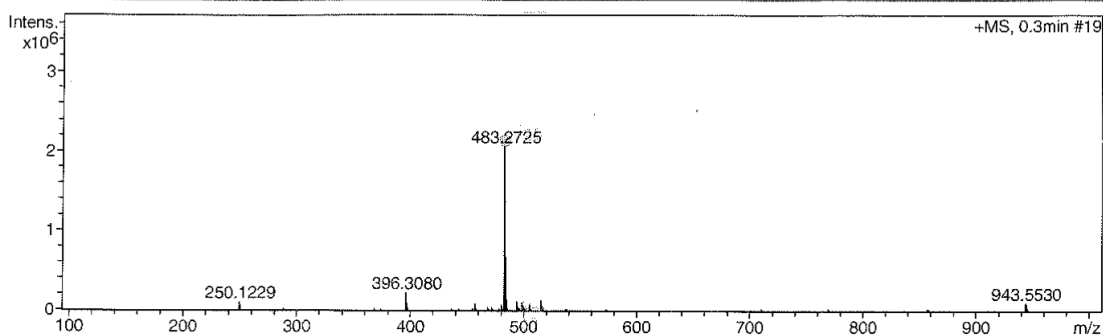

| Meas. m/z | # | Ion Formula                                      | m/z      | err [ppm] | mSigma | # Sigma | Score  | rdb | e <sup>-</sup> Conf | N-Rule |
|-----------|---|--------------------------------------------------|----------|-----------|--------|---------|--------|-----|---------------------|--------|
| 483.2725  | 1 | C <sub>27</sub> H <sub>40</sub> NaO <sub>6</sub> | 483.2717 | -1.7      | 15.8   | 1       | 100.00 | 7.5 | even                | ok     |

Figure S43. HR-ESIMS data for cacolide E (5)

## Mass Spectrum SmartFormula Report

### Analysis Info

Analysis Name D:\Data\s.khushi\CMB-03404-1-2-3-3.d  
Method tune-med\_AP.m  
Sample Name  
Comment

Acquisition Date 4/18/2018 12:04:13 PM

Operator a.piggott  
Instrument micrOTOF 213750.00232

### Acquisition Parameter

|             |            |                      |          |                  |           |
|-------------|------------|----------------------|----------|------------------|-----------|
| Source Type | ESI        | Ion Polarity         | Positive | Set Nebulizer    | 0.8 Bar   |
| Focus       | Not active |                      |          | Set Dry Heater   | 180 °C    |
| Scan Begin  | 100 m/z    | Set Capillary        | 4500 V   | Set Dry Gas      | 5.0 l/min |
| Scan End    | 1000 m/z   | Set End Plate Offset | -500 V   | Set Divert Valve | Source    |

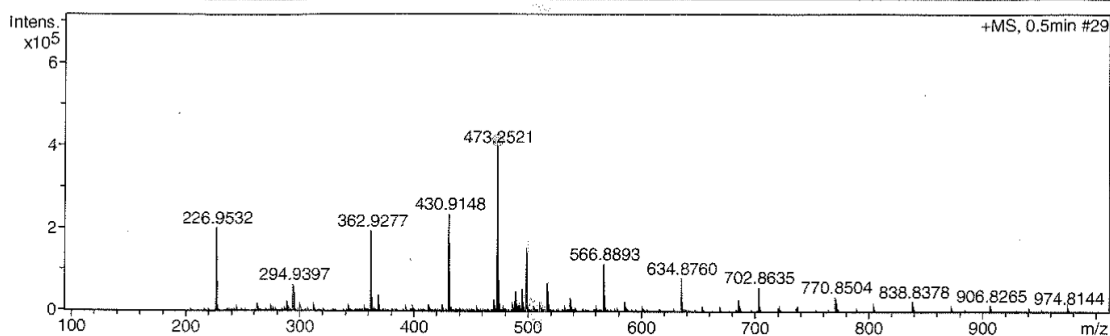

| Meas. m/z | # | Ion Formula                                      | m/z      | err [ppm] | mSigma | # Sigma | Score  | rdb | e <sup>-</sup> Conf | N-Rule |
|-----------|---|--------------------------------------------------|----------|-----------|--------|---------|--------|-----|---------------------|--------|
| 473.2521  | 1 | C <sub>25</sub> H <sub>38</sub> NaO <sub>7</sub> | 473.2510 | 2.3       | 3.9    | 1       | 100.00 | 6.5 | even                | ok     |

Figure S44. HR-ESIMS data for cacolide F (6)

## Mass Spectrum SmartFormula Report

### Analysis Info

Analysis Name D:\Data\s.khushi\CMB-03404-1-2-6-2.d  
Method tune-med\_AP.m  
Sample Name  
Comment

Acquisition Date 4/18/2018 12:45:23 PM

Operator a.piggott  
Instrument micrOTOF 213750.00232

### Acquisition Parameter

|             |            |                      |          |                  |           |
|-------------|------------|----------------------|----------|------------------|-----------|
| Source Type | ESI        | Ion Polarity         | Positive | Set Nebulizer    | 0.8 Bar   |
| Focus       | Not active |                      |          | Set Dry Heater   | 180 °C    |
| Scan Begin  | 100 m/z    | Set Capillary        | 4500 V   | Set Dry Gas      | 5.0 l/min |
| Scan End    | 1000 m/z   | Set End Plate Offset | -500 V   | Set Divert Valve | Source    |

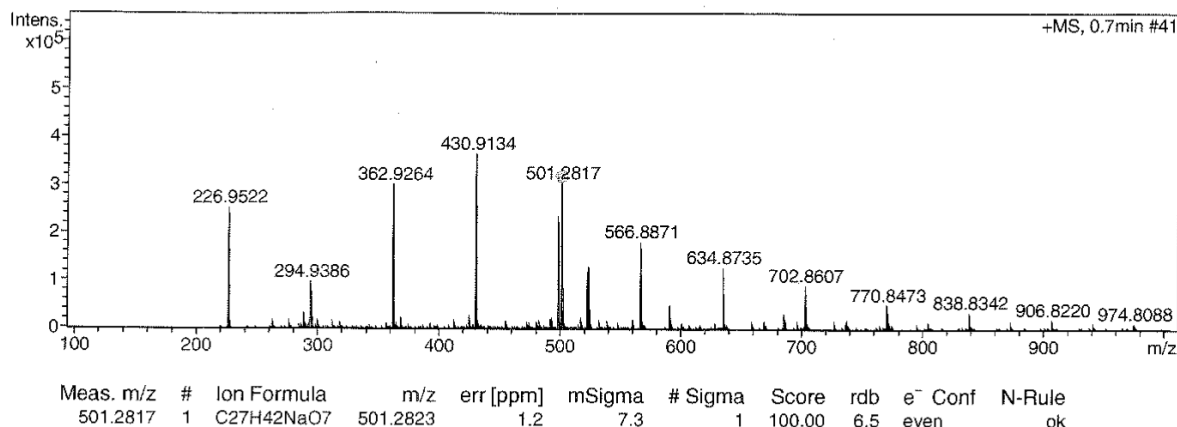

Figure S45. HR-ESIMS data for cacolide G (7)

## Mass Spectrum SmartFormula Report

### Analysis Info

Analysis Name D:\Data\s.khushi\CMB-03404-1-2-5-5.d  
Method tune-med\_AP.m  
Sample Name  
Comment

Acquisition Date 4/18/2018 11:59:07 AM

Operator a.piggott  
Instrument micrOTOF 213750.00232

### Acquisition Parameter

|             |            |                      |          |                  |           |
|-------------|------------|----------------------|----------|------------------|-----------|
| Source Type | ESI        | Ion Polarity         | Positive | Set Nebulizer    | 0.8 Bar   |
| Focus       | Not active |                      |          | Set Dry Heater   | 180 °C    |
| Scan Begin  | 100 m/z    | Set Capillary        | 4500 V   | Set Dry Gas      | 5.0 l/min |
| Scan End    | 1000 m/z   | Set End Plate Offset | -500 V   | Set Divert Valve | Source    |

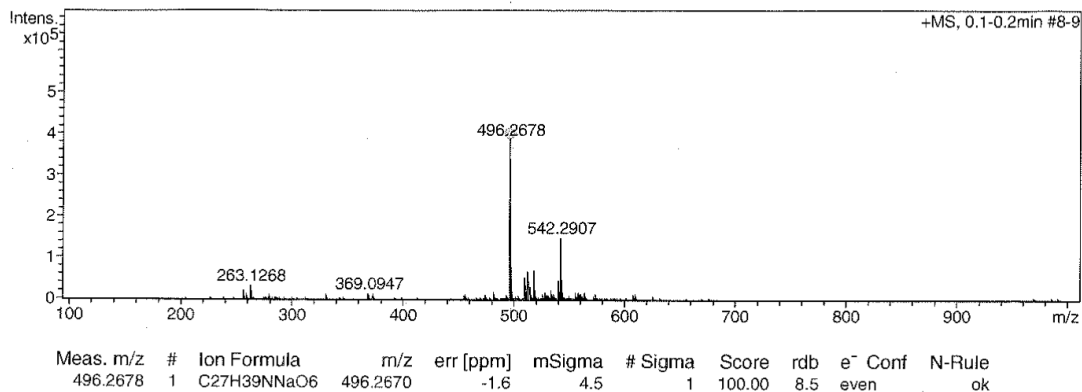

Figure S46. HR-ESIMS data for cacolide H (8)

## Mass Spectrum SmartFormula Report

### Analysis Info

Analysis Name D:\Data\s.khushi\CMB-03404-1-2-9.d  
Method tune-med\_AP.m  
Sample Name  
Comment

Acquisition Date 4/18/2018 11:30:41 AM

Operator a.piggott  
Instrument micrOTOF 213750.00232

### Acquisition Parameter

|             |            |                      |          |                  |           |
|-------------|------------|----------------------|----------|------------------|-----------|
| Source Type | ESI        | Ion Polarity         | Positive | Set Nebulizer    | 0.8 Bar   |
| Focus       | Not active |                      |          | Set Dry Heater   | 180 °C    |
| Scan Begin  | 100 m/z    | Set Capillary        | 4500 V   | Set Dry Gas      | 5.0 l/min |
| Scan End    | 1000 m/z   | Set End Plate Offset | -500 V   | Set Divert Valve | Source    |

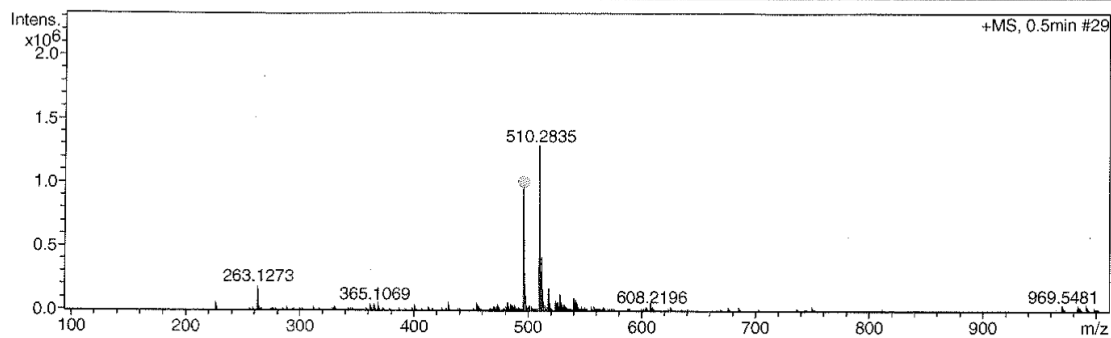

| Meas. m/z | # | Ion Formula                                       | m/z      | err [ppm] | mSigma | # Sigma | Score  | rdb | e <sup>-</sup> | Conf | N-Rule |
|-----------|---|---------------------------------------------------|----------|-----------|--------|---------|--------|-----|----------------|------|--------|
| 496.2682  | 1 | C <sub>27</sub> H <sub>39</sub> NNaO <sub>6</sub> | 496.2670 | 2.4       | 12.4   | 1       | 100.00 | 8.5 | even           |      | ok     |

**Figure S47.** HR-ESIMS data for cacolide I (9)

## Mass Spectrum Molecular Formula Report

### Analysis Info

Analysis Name D:\Data\s.khushi\CMB-03404-1-3-3-4-2nd.d  
 Method tune-med\_AP.m  
 Sample Name  
 Comment

Acquisition Date 10/5/2018 8:08:27 PM  
 Operator a.piggott  
 Instrument / Ser# micrOTOF 213750.00  
 232

### Acquisition Parameter

|             |            |                      |          |                  |           |
|-------------|------------|----------------------|----------|------------------|-----------|
| Source Type | ESI        | Ion Polarity         | Positive | Set Nebulizer    | -0.8 Bar  |
| Focus       | Not active |                      |          | Set Dry Heater   | 180 °C    |
| Scan Begin  | 100 m/z    | Set Capillary        | 4500 V   | Set Dry Gas      | 5.0 l/min |
| Scan End    | 1000 m/z   | Set End Plate Offset | -500 V   | Set Divert Valve | Source    |

### Generate Molecular Formula Parameter

|                  |                        |         |
|------------------|------------------------|---------|
| Formula, min.    |                        |         |
| Formula, max.    |                        |         |
| Measured m/z     | Tolerance              | Charge  |
| Check Valence    | Minimum                | Maximum |
| Nitrogen Rule    | Electron Configuration |         |
| Filter H/C Ratio | Minimum                | Maximum |
| Estimate Carbon  |                        |         |

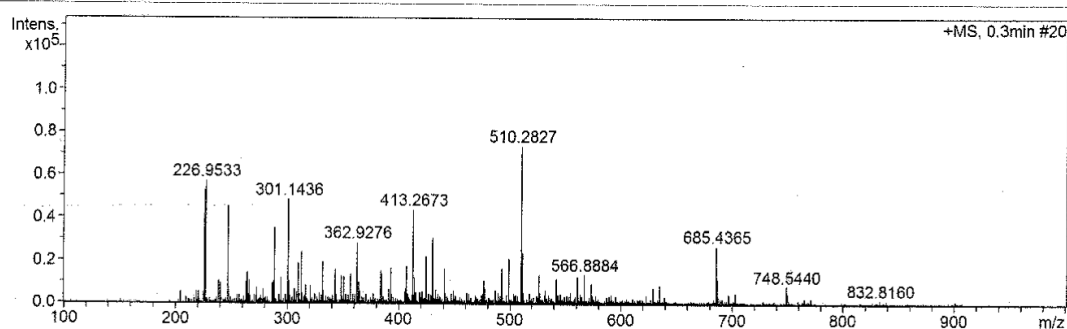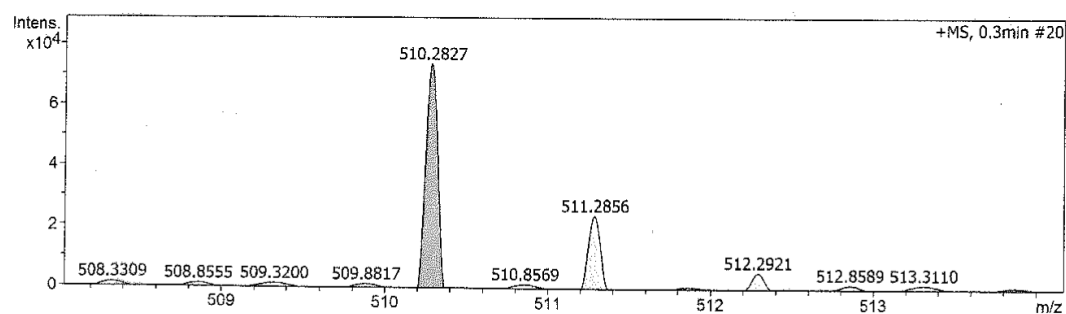

| Meas. m/z | # | Ion Formula                                       | m/z      | err [ppm] | mSigma | # Sigma | Score  | rdB | e <sup>-</sup> Conf | N-Rule |
|-----------|---|---------------------------------------------------|----------|-----------|--------|---------|--------|-----|---------------------|--------|
| 510.2827  | 1 | C <sub>28</sub> H <sub>41</sub> NNaO <sub>6</sub> | 510.2826 | 0.3       | 11.0   | 1       | 100.00 | 8.5 | even                | ok     |

**Figure S48.** HR-ESIMS data for cacolide J (10)



## Mass Spectrum SmartFormula Report

### Analysis Info

Analysis Name D:\Data\s.khushi\CMB-03404-1-2-2-4.d  
 Method tune-med\_AP.m  
 Sample Name  
 Comment

Acquisition Date 4/18/2018 12:52:34 PM

Operator a.piggott  
 Instrument micrOTOF 213750.00232

### Acquisition Parameter

|             |            |                      |          |                  |           |
|-------------|------------|----------------------|----------|------------------|-----------|
| Source Type | ESI        | Ion Polarity         | Positive | Set Nebulizer    | 0.8 Bar   |
| Focus       | Not active |                      |          | Set Dry Heater   | 180 °C    |
| Scan Begin  | 100 m/z    | Set Capillary        | 4500 V   | Set Dry Gas      | 5.0 l/min |
| Scan End    | 1000 m/z   | Set End Plate Offset | -500 V   | Set Divert Valve | Source    |

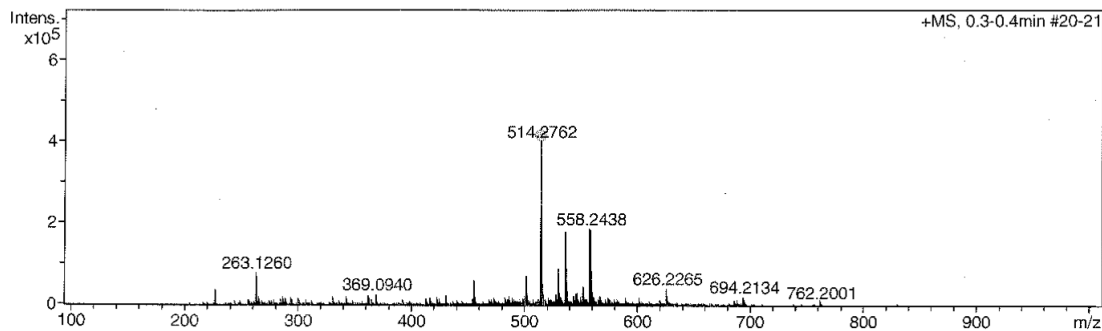

| Meas. m/z | # | Ion Formula | m/z      | err [ppm] | mSigma | # Sigma | Score  | rdb | e <sup>-</sup> Conf | N-Rule |
|-----------|---|-------------|----------|-----------|--------|---------|--------|-----|---------------------|--------|
| 514.2762  | 1 | C27H41NNaO7 | 514.2775 | 2.6       | 20.0   | 1       | 100.00 | 7.5 | even                | ok     |

**Figure S49.** HR-ESIMS data for cacolide K (11)

## Mass Spectrum SmartFormula Report

### Analysis Info

Analysis Name D:\Data\s.khushi\CMB-03404-1-2-2-6.d  
 Method tune-med\_AP.m  
 Sample Name  
 Comment

Acquisition Date 4/18/2018 11:41:00 AM

Operator a.piggott  
 Instrument micrOTOF 213750.00232

### Acquisition Parameter

|             |            |                      |          |                  |           |
|-------------|------------|----------------------|----------|------------------|-----------|
| Source Type | ESI        | Ion Polarity         | Positive | Set Nebulizer    | 0.8 Bar   |
| Focus       | Not active |                      |          | Set Dry Heater   | 180 °C    |
| Scan Begin  | 100 m/z    | Set Capillary        | 4500 V   | Set Dry Gas      | 5.0 l/min |
| Scan End    | 1000 m/z   | Set End Plate Offset | -500 V   | Set Divert Valve | Source    |

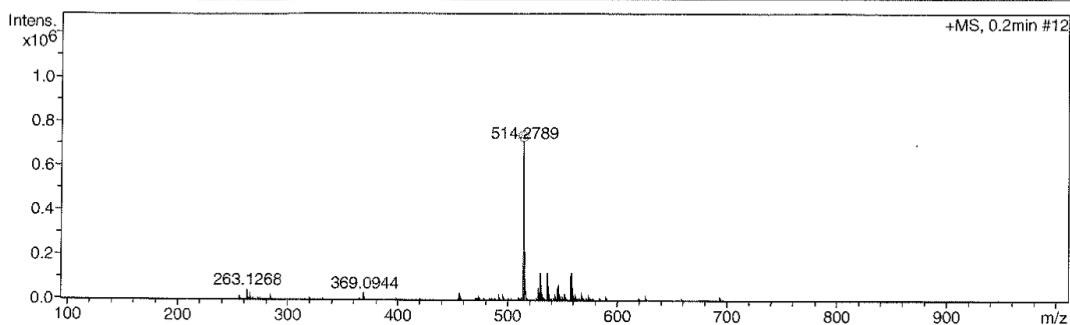

| Meas. m/z | # | Ion Formula | m/z      | err [ppm] | mSigma | # Sigma | Score  | rdb | e <sup>-</sup> Conf | N-Rule |
|-----------|---|-------------|----------|-----------|--------|---------|--------|-----|---------------------|--------|
| 514.2789  | 1 | C27H41NNaO7 | 514.2775 | -2.7      | 5.1    | 1       | 100.00 | 7.5 | even                | ok     |

**Figure S50.** HR-ESIMS data for cacolide L (12)

## Mass Spectrum SmartFormula Report

### Analysis Info

Analysis Name D:\Data\s.khushi\CMB-03404-1-2-6-7.d  
 Method tune-med\_AP.m  
 Sample Name  
 Comment

Acquisition Date 4/18/2018 12:26:02 PM  
 Operator a.piggott  
 Instrument micrOTOF 213750.00232

### Acquisition Parameter

|             |            |                      |          |                  |           |
|-------------|------------|----------------------|----------|------------------|-----------|
| Source Type | ESI        | Ion Polarity         | Positive | Set Nebulizer    | 0.8 Bar   |
| Focus       | Not active |                      |          | Set Dry Heater   | 180 °C    |
| Scan Begin  | 100 m/z    | Set Capillary        | 4500 V   | Set Dry Gas      | 5.0 l/min |
| Scan End    | 1000 m/z   | Set End Plate Offset | -500 V   | Set Divert Valve | Source    |

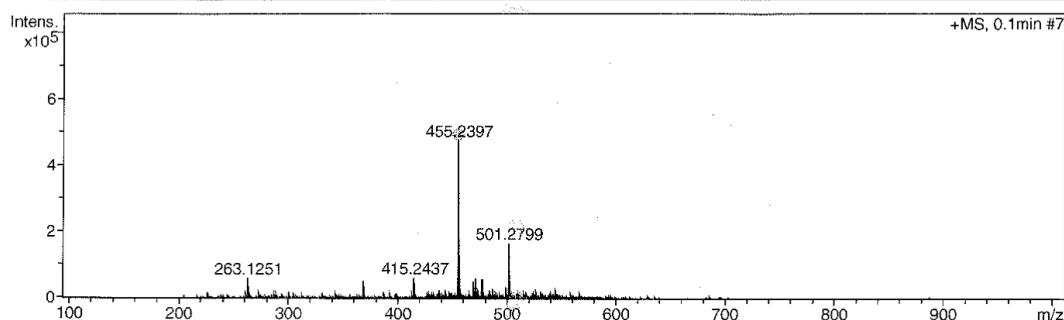

| Meas. m/z | # | Ion Formula                                      | m/z      | err [ppm] | mSigma | # Sigma | Score  | rdb | e <sup>-</sup> Conf | N-Rule |
|-----------|---|--------------------------------------------------|----------|-----------|--------|---------|--------|-----|---------------------|--------|
| 455.2397  | 1 | C <sub>25</sub> H <sub>36</sub> NaO <sub>6</sub> | 455.2404 | 1.7       | 7.4    | 1       | 100.00 | 7.5 | even                | ok     |

**Figure S51.** HR-ESIMS data for cacolic acid A (13)

## Mass Spectrum SmartFormula Report

### Analysis Info

Analysis Name D:\Data\s.khushi\CMB-03404-1-2-5-1.d  
 Method tune-med\_AP.m  
 Sample Name  
 Comment

Acquisition Date 4/18/2018 11:48:52 AM  
 Operator a.piggott  
 Instrument micrOTOF 213750.00232

### Acquisition Parameter

|             |            |                      |          |                  |           |
|-------------|------------|----------------------|----------|------------------|-----------|
| Source Type | ESI        | Ion Polarity         | Positive | Set Nebulizer    | 0.8 Bar   |
| Focus       | Not active |                      |          | Set Dry Heater   | 180 °C    |
| Scan Begin  | 100 m/z    | Set Capillary        | 4500 V   | Set Dry Gas      | 5.0 l/min |
| Scan End    | 1000 m/z   | Set End Plate Offset | -500 V   | Set Divert Valve | Source    |

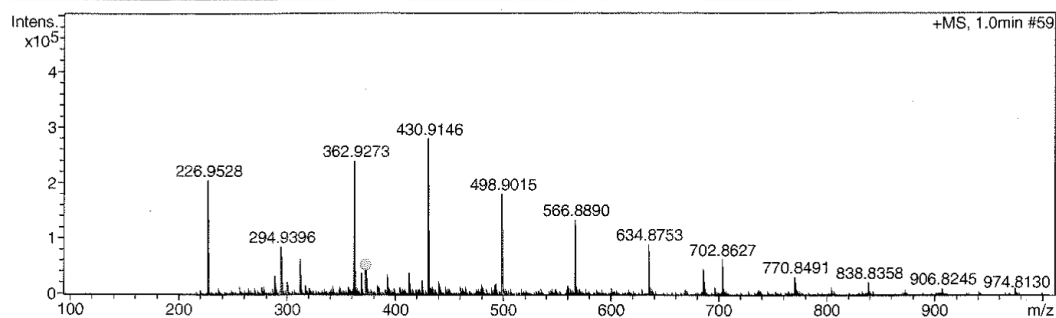

| Meas. m/z | # | Ion Formula                                      | m/z      | err [ppm] | mSigma | # Sigma | Score  | rdb | e <sup>-</sup> Conf | N-Rule |
|-----------|---|--------------------------------------------------|----------|-----------|--------|---------|--------|-----|---------------------|--------|
| 373.1995  | 1 | C <sub>20</sub> H <sub>30</sub> NaO <sub>5</sub> | 373.1985 | 2.7       | 63.2   | 1       | 100.00 | 5.5 | even                | ok     |

**Figure S52.** HR-ESIMS data for cacolic acid B (14)

## Mass Spectrum SmartFormula Report

### Analysis Info

Analysis Name D:\Data\s.khushi\CMB-03404-1-2-5-2.d  
 Method tune-med\_AP.m  
 Sample Name  
 Comment

Acquisition Date 4/18/2018 12:59:59 PM

Operator a.piggott  
 Instrument micrOTOF 213750.00232

### Acquisition Parameter

|             |            |                      |          |                  |           |
|-------------|------------|----------------------|----------|------------------|-----------|
| Source Type | ESI        | Ion Polarity         | Positive | Set Nebulizer    | 0.8 Bar   |
| Focus       | Not active |                      |          | Set Dry Heater   | 180 °C    |
| Scan Begin  | 100 m/z    | Set Capillary        | 4500 V   | Set Dry Gas      | 5.0 l/min |
| Scan End    | 1000 m/z   | Set End Plate Offset | -500 V   | Set Divert Valve | Source    |

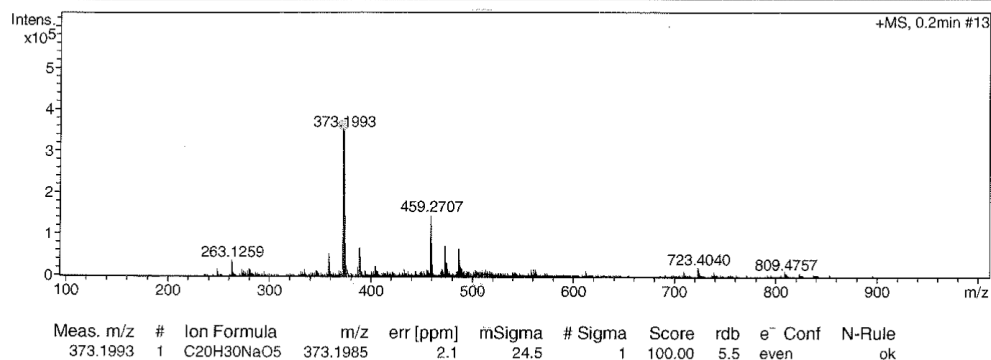

**Figure S53.** HR-ESIMS data for cacolic acid C (15)
